# Supplementary material for: Artificial Intelligence-Guided Design of some Pan-H5N1-clade 2.3.4.4b Mosaic DNA-based vaccines to combat the circulating HPAI in birds
Source: Research Square preprint supplement (doi:10.21203/rs.3.rs-6711963/v1), 2025-05-23
Supplement: Supplementary file 1 [file 7bd151b7ad1f60c2cf909e16.xlsx]

## Sheet: Chicken
Accession Number	Strain	Size	State/region	Isolation date
PV370536	Influenza A virus (A/chicken/Larimer-BYC/2.3.4.4b/2022(H5N1)) segment 6 neuraminidase (NA) gene, complete cds		Larimer-BYC	2022-01-01
OR819338	Influenza A virus (A/chicken/New York/NYCVH-168127/2023(H5N1)) segment 6 neuraminidase (NA) gene, complete cds	1451	New York	2023-04-09
OQ967118	Influenza A virus (A/chicken/Colorado/22-011826-001/2022(H5N1)) segment 6 neuraminidase (NA) gene, complete cds	1455	Colorado	2022-04-15
OQ967126	Influenza A virus (A/chicken/Colorado/22-011826-002/2022(H5N1)) segment 6 neuraminidase (NA) gene, complete cds	1410	Colorado	2022-04-15
OQ967134	Influenza A virus (A/chicken/Colorado/22-012308-001/2022(H5N1)) segment 6 neuraminidase (NA) gene, complete cds	1410	Colorado	2022-04-19
OQ967142	Influenza A virus (A/chicken/Colorado/22-012308-002/2022(H5N1)) segment 6 neuraminidase (NA) gene, complete cds	1410	Colorado	2022-04-19
OQ967150	Influenza A virus (A/chicken/Colorado/22-012308-003/2022(H5N1)) segment 6 neuraminidase (NA) gene, complete cds	1410	Colorado	2022-04-19
OQ967158	Influenza A virus (A/chicken/Colorado/22-013057-001/2022(H5N1)) segment 6 neuraminidase (NA) gene, complete cds	1410	Colorado	2022-04-28
OQ967166	Influenza A virus (A/chicken/Delaware/22-005260-001/2022(H5N1)) segment 6 neuraminidase (NA) gene, complete cds	1410	Delaware	2022-02-21
OQ967174	Influenza A virus (A/chicken/Delaware/22-006945-001/2022(H5N1)) segment 6 neuraminidase (NA) gene, complete cds	1410	Delaware	2022-03-07
OQ967182	Influenza A virus (A/chicken/Delaware/22-006945-002/2022(H5N1)) segment 6 neuraminidase (NA) gene, complete cds	1410	Delaware	2022-03-07
OQ967190	Influenza A virus (A/chicken/Delaware/22-006945-003/2022(H5N1)) segment 6 neuraminidase (NA) gene, complete cds	1410	Delaware	2022-03-07
OQ967198	Influenza A virus (A/chicken/Delaware/22-006945-004/2022(H5N1)) segment 6 neuraminidase (NA) gene, complete cds	1410	Delaware	2022-03-07
OQ967206	Influenza A virus (A/chicken/Delaware/22-008054-001/2022(H5N1)) segment 6 neuraminidase (NA) gene, complete cds	1410	Delaware	2022-03-16
OQ967214	Influenza A virus (A/chicken/Delaware/22-008054-003/2022(H5N1)) segment 6 neuraminidase (NA) gene, complete cds	1410	Delaware	2022-03-16
OQ967222	Influenza A virus (A/chicken/Delaware/22-008054-004/2022(H5N1)) segment 6 neuraminidase (NA) gene, complete cds	1410	Delaware	2022-03-16
OQ967230	Influenza A virus (A/chicken/Idaho/22-011336-001/2022(H5N1)) segment 6 neuraminidase (NA) gene, complete cds	1410	Idaho	2022-04-13
OQ967238	Influenza A virus (A/chicken/Idaho/22-011347-002/2022(H5N1)) segment 6 neuraminidase (NA) gene, complete cds	1410	Idaho	2022-04-14
OQ967246	Influenza A virus (A/chicken/Idaho/22-011347-004/2022(H5N1)) segment 6 neuraminidase (NA) gene, complete cds	1410	Idaho	2022-04-14
OQ967254	Influenza A virus (A/chicken/Idaho/22-011347-005/2022(H5N1)) segment 6 neuraminidase (NA) gene, complete cds	1410	Idaho	2022-04-14
OQ967262	Influenza A virus (A/chicken/Indiana/22-012933-001/2022(H5N1)) segment 6 neuraminidase (NA) gene, complete cds	1410	Indiana	2022-04-23
OQ967270	Influenza A virus (A/chicken/Iowa/22-007376-001/2022(H5N1)) segment 6 neuraminidase (NA) gene, complete cds	1410	Iowa	2022-03-10
OQ967278	Influenza A virus (A/chicken/Iowa/22-007376-003/2022(H5N1)) segment 6 neuraminidase (NA) gene, complete cds	1410	Iowa	2022-03-10
OQ967286	Influenza A virus (A/chicken/Iowa/22-007376-005/2022(H5N1)) segment 6 neuraminidase (NA) gene, complete cds	1410	Iowa	2022-03-10
OQ967294	Influenza A virus (A/chicken/Iowa/22-007376-007/2022(H5N1)) segment 6 neuraminidase (NA) gene, complete cds	1410	Iowa	2022-03-10
OQ967302	Influenza A virus (A/chicken/Iowa/22-007376-012/2022(H5N1)) segment 6 neuraminidase (NA) gene, complete cds	1410	Iowa	2022-03-10
OQ967310	Influenza A virus (A/chicken/Iowa/22-008176-003/2022(H5N1)) segment 6 neuraminidase (NA) gene, complete cds	1410	Iowa	2022-03-17
OQ967318	Influenza A virus (A/chicken/Iowa/22-008176-004/2022(H5N1)) segment 6 neuraminidase (NA) gene, complete cds	1410	Iowa	2022-03-17
OQ967326	Influenza A virus (A/chicken/Iowa/22-008176-005/2022(H5N1)) segment 6 neuraminidase (NA) gene, complete cds	1410	Iowa	2022-03-17
OQ967334	Influenza A virus (A/chicken/Iowa/22-009180-001/2022(H5N1)) segment 6 neuraminidase (NA) gene, complete cds	1410	Iowa	2022-03-25
OQ967342	Influenza A virus (A/chicken/Iowa/22-009180-002/2022(H5N1)) segment 6 neuraminidase (NA) gene, complete cds	1410	Iowa	2022-03-25
OQ967350	Influenza A virus (A/chicken/Iowa/22-009287-001/2022(H5N1)) segment 6 neuraminidase (NA) gene, complete cds	1410	Iowa	2022-03-28
OQ967358	Influenza A virus (A/chicken/Iowa/22-009819-001/2022(H5N1)) segment 6 neuraminidase (NA) gene, complete cds	1410	Iowa	2022-03-31
OQ967366	Influenza A virus (A/chicken/Iowa/22-009819-002/2022(H5N1)) segment 6 neuraminidase (NA) gene, complete cds	1410	Iowa	2022-03-31
OQ967374	Influenza A virus (A/chicken/Iowa/22-009985-001/2022(H5N1)) segment 6 neuraminidase (NA) gene, complete cds	1410	Iowa	2022-04-01
OQ967382	Influenza A virus (A/chicken/Kentucky/22-004416-001/2022(H5N1)) segment 6 neuraminidase (NA) gene, complete cds	1410	Kentucky	2022-02-11
OQ967390	Influenza A virus (A/chicken/Kentucky/22-004416-002/2022(H5N1)) segment 6 neuraminidase (NA) gene, complete cds	1410	Kentucky	2022-02-11
OQ967398	Influenza A virus (A/chicken/Kentucky/22-004416-003/2022(H5N1)) segment 6 neuraminidase (NA) gene, complete cds	1410	Kentucky	2022-02-11
OQ967406	Influenza A virus (A/chicken/Maryland/22-006578-001/2022(H5N1)) segment 6 neuraminidase (NA) gene, complete cds	1410	Maryland	2022-03-03
OQ967414	Influenza A virus (A/chicken/Maryland/22-006578-002/2022(H5N1)) segment 6 neuraminidase (NA) gene, complete cds	1410	Maryland	2022-03-03
OQ967422	Influenza A virus (A/chicken/Maryland/22-006578-005/2022(H5N1)) segment 6 neuraminidase (NA) gene, complete cds	1410	Maryland	2022-03-03
OQ967430	Influenza A virus (A/chicken/Maryland/22-006578-013/2022(H5N1)) segment 6 neuraminidase (NA) gene, complete cds	1410	Maryland	2022-03-03
OQ967438	Influenza A virus (A/chicken/Maryland/22-006578-014/2022(H5N1)) segment 6 neuraminidase (NA) gene, complete cds	1410	Maryland	2022-03-03
OQ967446	Influenza A virus (A/chicken/Maryland/22-006948-001/2022(H5N1)) segment 6 neuraminidase (NA) gene, complete cds	1410	Maryland	2022-03-04
OQ967454	Influenza A virus (A/chicken/Maryland/22-007086-001/2022(H5N1)) segment 6 neuraminidase (NA) gene, complete cds	1410	Maryland	2022-03-07
OQ967462	Influenza A virus (A/chicken/Maryland/22-007273-001/2022(H5N1)) segment 6 neuraminidase (NA) gene, complete cds	1410	Maryland	2022-03-08
OQ967470	Influenza A virus (A/chicken/Maryland/22-007273-002/2022(H5N1)) segment 6 neuraminidase (NA) gene, complete cds	1410	Maryland	2022-03-08
OQ967478	Influenza A virus (A/chicken/Maryland/22-007273-003/2022(H5N1)) segment 6 neuraminidase (NA) gene, complete cds	1410	Maryland	2022-03-08
OQ967486	Influenza A virus (A/chicken/Maryland/22-007273-004/2022(H5N1)) segment 6 neuraminidase (NA) gene, complete cds	1410	Maryland	2022-03-08
OQ967494	Influenza A virus (A/chicken/Maryland/22-007273-005/2022(H5N1)) segment 6 neuraminidase (NA) gene, complete cds	1410	Maryland	2022-03-08
OQ967502	Influenza A virus (A/chicken/Maryland/22-008243-001/2022(H5N1)) segment 6 neuraminidase (NA) gene, complete cds	1410	Maryland	2022-03-17
OQ967510	Influenza A virus (A/chicken/Michigan/22-011627-001/2022(H5N1)) segment 6 neuraminidase (NA) gene, complete cds	1410	Michigan	2022-04-13
OQ967518	Influenza A virus (A/chicken/Michigan/22-012855-001/2022(H5N1)) segment 6 neuraminidase (NA) gene, complete cds	1410	Michigan	2022-04-25
OQ967526	Influenza A virus (A/chicken/Michigan/22-012855-002/2022(H5N1)) segment 6 neuraminidase (NA) gene, complete cds	1410	Michigan	2022-04-25
OQ967534	Influenza A virus (A/chicken/Michigan/22-012855-003/2022(H5N1)) segment 6 neuraminidase (NA) gene, complete cds	1410	Michigan	2022-04-25
OQ967542	Influenza A virus (A/chicken/Michigan/22-012855-004/2022(H5N1)) segment 6 neuraminidase (NA) gene, complete cds	1410	Michigan	2022-04-25
OQ967550	Influenza A virus (A/chicken/Michigan/22-012855-005/2022(H5N1)) segment 6 neuraminidase (NA) gene, complete cds	1410	Michigan	2022-04-25
OQ967558	Influenza A virus (A/chicken/Michigan/22-012977-001/2022(H5N1)) segment 6 neuraminidase (NA) gene, complete cds	1410	Michigan	2022-04-26
OQ967566	Influenza A virus (A/chicken/Michigan/22-013224-001/2022(H5N1)) segment 6 neuraminidase (NA) gene, complete cds	1410	Michigan	2022-04-29
OQ967574	Influenza A virus (A/chicken/Minnesota/22-010993-001/2022(H5N1)) segment 6 neuraminidase (NA) gene, complete cds	1410	Minnesota	2022-04-10
OQ967582	Influenza A virus (A/chicken/Minnesota/22-010993-004/2022(H5N1)) segment 6 neuraminidase (NA) gene, complete cds	1410	Minnesota	2022-04-10
OQ967590	Influenza A virus (A/chicken/Minnesota/22-010994-001/2022(H5N1)) segment 6 neuraminidase (NA) gene, complete cds	1410	Minnesota	2022-04-10
OQ967598	Influenza A virus (A/chicken/Minnesota/22-012373-001/2022(H5N1)) segment 6 neuraminidase (NA) gene, complete cds	1410	Minnesota	2022-04-21
OQ967606	Influenza A virus (A/chicken/Minnesota/22-012932-001/2022(H5N1)) segment 6 neuraminidase (NA) gene, complete cds	1410	Minnesota	2022-04-26
OQ967614	Influenza A virus (A/chicken/Minnesota/22-012966-001/2022(H5N1)) segment 6 neuraminidase (NA) gene, complete cds	1410	Minnesota	2022-04-26
OQ967622	Influenza A virus (A/chicken/Missouri/22-006569-001/2022(H5N1)) segment 6 neuraminidase (NA) gene, complete cds	1410	Missouri	2022-03-02
OQ967630	Influenza A virus (A/chicken/Missouri/22-006569-004/2022(H5N1)) segment 6 neuraminidase (NA) gene, complete cds	1410	Missouri	2022-03-02
OQ967638	Influenza A virus (A/chicken/Missouri/22-006569-005/2022(H5N1)) segment 6 neuraminidase (NA) gene, complete cds	1410	Missouri	2022-03-02
OQ967646	Influenza A virus (A/chicken/Missouri/22-006569-007/2022(H5N1)) segment 6 neuraminidase (NA) gene, complete cds	1410	Missouri	2022-03-02
OQ967654	Influenza A virus (A/chicken/Montana/22-010923-004/2022(H5N1)) segment 6 neuraminidase (NA) gene, complete cds	1410	Montana	2022-04-09
OQ967662	Influenza A virus (A/chicken/Montana/22-010923-006/2022(H5N1)) segment 6 neuraminidase (NA) gene, complete cds	1410	Montana	2022-04-09
OQ967670	Influenza A virus (A/chicken/Montana/22-012040-001/2022(H5N1)) segment 6 neuraminidase (NA) gene, complete cds	1410	Montana	2022-04-19
OQ967678	Influenza A virus (A/chicken/Montana/22-012040-003/2022(H5N1)) segment 6 neuraminidase (NA) gene, complete cds	1410	Montana	2022-04-19
OQ967686	Influenza A virus (A/chicken/Montana/22-012540-001/2022(H5N1)) segment 6 neuraminidase (NA) gene, complete cds	1410	Montana	2022-04-22
OQ967694	Influenza A virus (A/chicken/Montana/22-013053-001/2022(H5N1)) segment 6 neuraminidase (NA) gene, complete cds	1410	Montana	2022-04-28
OQ967702	Influenza A virus (A/chicken/Montana/22-013053-002/2022(H5N1)) segment 6 neuraminidase (NA) gene, complete cds	1410	Montana	2022-04-28
OQ967710	Influenza A virus (A/chicken/Montana/22-013056-002/2022(H5N1)) segment 6 neuraminidase (NA) gene, complete cds	1410	Montana	2022-04-28
OQ967718	Influenza A virus (A/chicken/Nebraska/22-008467-001/2022(H5N1)) segment 6 neuraminidase (NA) gene, complete cds	1410	Nebraska	2022-03-21
OQ967726	Influenza A virus (A/chicken/Nebraska/22-009006-001/2022(H5N1)) segment 6 neuraminidase (NA) gene, complete cds	1410	Nebraska	2022-03-23
OQ967734	Influenza A virus (A/chicken/Nebraska/22-010905-001/2022(H5N1)) segment 6 neuraminidase (NA) gene, complete cds	1410	Nebraska	2022-04-11
OQ967742	Influenza A virus (A/chicken/Nebraska/22-012756-001/2022(H5N1)) segment 6 neuraminidase (NA) gene, complete cds	1410	Nebraska	2022-04-26
OQ967750	Influenza A virus (A/chicken/North Carolina/22-010298-001/2022(H5N1)) segment 6 neuraminidase (NA) gene, complete cds	1410	North Carolina	2022-04-04
OQ967758	Influenza A virus (A/chicken/North Carolina/22-010298-002/2022(H5N1)) segment 6 neuraminidase (NA) gene, complete cds	1410	North Carolina	2022-04-04
OQ967766	Influenza A virus (A/chicken/North Carolina/22-010299-002/2022(H5N1)) segment 6 neuraminidase (NA) gene, complete cds	1410	North Carolina	2022-04-04
OQ967774	Influenza A virus (A/chicken/North Carolina/22-010929-001/2022(H5N1)) segment 6 neuraminidase (NA) gene, complete cds	1410	North Carolina	2022-04-11
OQ967782	Influenza A virus (A/chicken/North Carolina/22-010929-002/2022(H5N1)) segment 6 neuraminidase (NA) gene, complete cds	1410	North Carolina	2022-04-11
OQ967790	Influenza A virus (A/chicken/North Carolina/22-010929-007/2022(H5N1)) segment 6 neuraminidase (NA) gene, complete cds	1410	North Carolina	2022-04-11
OQ967798	Influenza A virus (A/chicken/North Dakota/22-009337-001/2022(H5N1)) segment 6 neuraminidase (NA) gene, complete cds	1410	North Dakota	2022-03-28
OQ967806	Influenza A virus (A/chicken/North Dakota/22-009677-001/2022(H5N1)) segment 6 neuraminidase (NA) gene, complete cds	1410	North Dakota	2022-03-30
OQ967814	Influenza A virus (A/chicken/North Dakota/22-011109-001/2022(H5N1)) segment 6 neuraminidase (NA) gene, complete cds	1410	North Dakota	2022-04-11
OQ967822	Influenza A virus (A/chicken/North Dakota/22-011286-001/2022(H5N1)) segment 6 neuraminidase (NA) gene, complete cds	1410	North Dakota	2022-04-12
OQ967830	Influenza A virus (A/chicken/North Dakota/22-012538-001/2022(H5N1)) segment 6 neuraminidase (NA) gene, complete cds	1410	North Dakota	2022-04-25
OQ967838	Influenza A virus (A/chicken/North Dakota/22-012538-002/2022(H5N1)) segment 6 neuraminidase (NA) gene, complete cds	1410	North Dakota	2022-04-25
OQ967846	Influenza A virus (A/chicken/Oklahoma/22-013220-001/2022(H5N1)) segment 6 neuraminidase (NA) gene, complete cds	1410	Oklahoma	2022-04-28
OQ967854	Influenza A virus (A/chicken/Pennsylvania/22-011531-001/2022(H5N1)) segment 6 neuraminidase (NA) gene, complete cds	1410	Pennsylvania	2022-04-14
OQ967862	Influenza A virus (A/chicken/Pennsylvania/22-011531-005/2022(H5N1)) segment 6 neuraminidase (NA) gene, complete cds	1410	Pennsylvania	2022-04-14
OQ967870	Influenza A virus (A/chicken/Pennsylvania/22-011531-006/2022(H5N1)) segment 6 neuraminidase (NA) gene, complete cds	1410	Pennsylvania	2022-04-14
OQ967878	Influenza A virus (A/chicken/Pennsylvania/22-011767-001/2022(H5N1)) segment 6 neuraminidase (NA) gene, complete cds	1410	Pennsylvania	2022-04-16
OQ967886	Influenza A virus (A/chicken/Pennsylvania/22-011920-001/2022(H5N1)) segment 6 neuraminidase (NA) gene, complete cds	1410	Pennsylvania	2022-04-18
OQ967894	Influenza A virus (A/chicken/Pennsylvania/22-011921-002/2022(H5N1)) segment 6 neuraminidase (NA) gene, complete cds	1410	Pennsylvania	2022-04-18
OQ967902	Influenza A virus (A/chicken/Pennsylvania/22-012091-001/2022(H5N1)) segment 6 neuraminidase (NA) gene, complete cds	1410	Pennsylvania	2022-04-19
OQ967910	Influenza A virus (A/chicken/Pennsylvania/22-012092-003/2022(H5N1)) segment 6 neuraminidase (NA) gene, complete cds	1410	Pennsylvania	2022-04-19
OQ967918	Influenza A virus (A/chicken/Pennsylvania/22-012092-005/2022(H5N1)) segment 6 neuraminidase (NA) gene, complete cds	1410	Pennsylvania	2022-04-19
OQ967926	Influenza A virus (A/chicken/Pennsylvania/22-012092-007/2022(H5N1)) segment 6 neuraminidase (NA) gene, complete cds	1410	Pennsylvania	2022-04-19
OQ967934	Influenza A virus (A/chicken/Pennsylvania/22-012092-008/2022(H5N1)) segment 6 neuraminidase (NA) gene, complete cds	1410	Pennsylvania	2022-04-19
OQ967942	Influenza A virus (A/chicken/Pennsylvania/22-012248-001/2022(H5N1)) segment 6 neuraminidase (NA) gene, complete cds	1410	Pennsylvania	2022-04-19
OQ967950	Influenza A virus (A/chicken/Pennsylvania/22-012578-004/2022(H5N1)) segment 6 neuraminidase (NA) gene, complete cds	1410	Pennsylvania	2022-04-25
OQ967958	Influenza A virus (A/chicken/Pennsylvania/22-012742-001/2022(H5N1)) segment 6 neuraminidase (NA) gene, complete cds	1410	Pennsylvania	2022-04-26
OQ967966	Influenza A virus (A/chicken/Utah/22-011468-001/2022(H5N1)) segment 6 neuraminidase (NA) gene, complete cds	1410	Utah	2022-04-14
OQ967974	Influenza A virus (A/chicken/Utah/22-011468-002/2022(H5N1)) segment 6 neuraminidase (NA) gene, complete cds	1410	Utah	2022-04-14
OQ967982	Influenza A virus (A/chicken/Utah/22-012375-001/2022(H5N1)) segment 6 neuraminidase (NA) gene, complete cds	1410	Utah	2022-04-21
OQ967990	Influenza A virus (A/chicken/Wisconsin/22-007545-001/2022(H5N1)) segment 6 neuraminidase (NA) gene, complete cds	1410	Wisconsim	2022-03-13
OQ967998	Influenza A virus (A/chicken/Wisconsin/22-007545-004/2022(H5N1)) segment 6 neuraminidase (NA) gene, complete cds	1410	Wisconsim	2022-03-13
OQ968006	Influenza A virus (A/chicken/Wisconsin/22-007545-005/2022(H5N1)) segment 6 neuraminidase (NA) gene, complete cds	1410	Wisconsim	2022-03-13
OQ968014	Influenza A virus (A/chicken/Wisconsin/22-011334-002/2022(H5N1)) segment 6 neuraminidase (NA) gene, complete cds	1410	Wisconsim	2022-04-13

## Sheet: Duck
Accession Number	Strain	Size	State/region	Isolation date
OQ957614	Influenza A virus (A/American Black Duck/Connecticut/22-005000-001/2022(H5N1)) segment 6 neuraminidase (NA) gene, complete cds	1410	Connecticut	2022-02-06
OQ957622	Influenza A virus (A/American Black Duck/Connecticut/22-005313-006/2022(H5N1)) segment 6 neuraminidase (NA) gene, complete cds	1410	Connecticut	2022-02-16
OQ957630	Influenza A virus (A/American Black Duck/Connecticut/22-005313-007/2022(H5N1)) segment 6 neuraminidase (NA) gene, complete cds	1410	Connecticut	2022-02-16
OQ957638	Influenza A virus (A/American Black Duck/Connecticut/22-005313-008/2022(H5N1)) segment 6 neuraminidase (NA) gene, complete cds	1410	Connecticut	2022-02-16
OQ957646	Influenza A virus (A/American Black Duck/Ohio/22-009205-005/2022(H5N1)) segment 6 neuraminidase (NA) gene, complete cds	1410	Ohio	2022-03-04
OQ957654	Influenza A virus (A/American Black Duck/Ohio/22-009205-010/2022(H5N1)) segment 6 neuraminidase (NA) gene, complete cds	1410	Ohio	2022-03-04
OQ957662	Influenza A virus (A/American Black Duck/Ohio/22-009209-007/2022(H5N1)) segment 6 neuraminidase (NA) gene, complete cds	1410	Ohio	2022-03-09
OQ960926	Influenza A virus (A/Duck/Florida/22-006447-001/2022(H5N1)) segment 6 neuraminidase (NA) gene, complete cds	1410	Florida	2022-03-03
OQ960934	Influenza A virus (A/Duck/Idaho/22-012046-001/2022(H5N1)) segment 6 neuraminidase (NA) gene, complete cds	1410	Idaho	2022-04-18
OQ960942	Influenza A virus (A/Duck/Idaho/22-012047-001/2022(H5N1)) segment 6 neuraminidase (NA) gene, complete cds	1410	Idaho	2022-04-18
OQ960950	Influenza A virus (A/Duck/Indiana/22-010611-001/2022(H5N1)) segment 6 neuraminidase (NA) gene, complete cds	1410	Indiana	2022-04-07
OQ960958	Influenza A virus (A/Duck/Indiana/22-010624-001/2022(H5N1)) segment 6 neuraminidase (NA) gene, complete cds	1410	Indiana	2022-04-07
OQ960966	Influenza A virus (A/Duck/Indiana/22-011343-001/2022(H5N1)) segment 6 neuraminidase (NA) gene, complete cds	1410	Indiana	2022-04-12
OQ960974	Influenza A virus (A/Duck/Indiana/22-011946-002/2022(H5N1)) segment 6 neuraminidase (NA) gene, complete cds	1410	Indiana	2022-04-17
OQ960982	Influenza A virus (A/Duck/Indiana/22-011946-004/2022(H5N1)) segment 6 neuraminidase (NA) gene, complete cds	1410	Indiana	2022-04-17
OQ960990	Influenza A virus (A/Duck/Montana/22-010454-001/2022(H5N1)) segment 6 neuraminidase (NA) gene, complete cds	1410	Montana	2022-04-06
OQ960998	Influenza A virus (A/Duck/Montana/22-010454-003/2022(H5N1)) segment 6 neuraminidase (NA) gene, complete cds	1410	Montana	2022-04-06
OQ961006	Influenza A virus (A/Duck/Montana/22-012040-005/2022(H5N1)) segment 6 neuraminidase (NA) gene, complete cds	1410	Montana	2022-04-19
OQ961014	Influenza A virus (A/Duck/Montana/22-012040-007/2022(H5N1)) segment 6 neuraminidase (NA) gene, complete cds	1410	Montana	2022-04-19
OQ961022	Influenza A virus (A/Duck/Montana/22-013055-005/2022(H5N1)) segment 6 neuraminidase (NA) gene, complete cds	1410	Montana	2022-04-27
OQ961030	Influenza A virus (A/Duck/Montana/22-013055-006/2022(H5N1)) segment 6 neuraminidase (NA) gene, complete cds	1410	Montana	2022-04-27
OQ961038	Influenza A virus (A/Duck/Montana/22-013055-007/2022(H5N1)) segment 6 neuraminidase (NA) gene, complete cds	1410	Montana	2022-04-27
OQ961046	Influenza A virus (A/Duck/Pennsylvania/22-013189-003/2022(H5N1)) segment 6 neuraminidase (NA) gene, complete cds	1410	Pennsylvania	2022-04-28
OQ961054	Influenza A virus (A/Duck/Pennsylvania/22-013189-004/2022(H5N1)) segment 6 neuraminidase (NA) gene, complete cds	1410	Pennsylvania	2022-04-28
OQ962590	Influenza A virus (A/Muscovy Duck/Florida/22-010679-002/2022(H5N1)) segment 6 neuraminidase (NA) gene, complete cds	1410	Florida	2022-04-04
OQ962598	Influenza A virus (A/Muscovy Duck/Florida/22-010679-003/2022(H5N1)) segment 6 neuraminidase (NA) gene, complete cds	1410	Florida	2022-04-04
OQ962606	Influenza A virus (A/Muscovy Duck/Florida/22-010682-002/2022(H5N1)) segment 6 neuraminidase (NA) gene, complete cds	1410	Florida	2022-04-05
OQ963270	Influenza A virus (A/Ring-necked Duck/Michigan/22-009361-006/2022(H5N1)) segment 6 neuraminidase (NA) gene, complete cds	1410	Michigan	2022-03-23
OQ963278	Influenza A virus (A/Ring-necked Duck/Michigan/22-009361-011/2022(H5N1)) segment 6 neuraminidase (NA) gene, complete cds	1410	Michigan	2022-03-23
OQ963294	Influenza A virus (A/Ring-necked Duck/Missouri/22-012338-025/2022(H5N1)) segment 6 neuraminidase (NA) gene, complete cds	1410	Missouri	2022-03-11
OQ966958	Influenza A virus (A/Wood Duck/Michigan/22-009361-014/2022(H5N1)) segment 6 neuraminidase (NA) gene, complete cds	1410	Michigan	2022-03-23
OQ966966	Influenza A virus (A/Wood Duck/Michigan/22-009361-015/2022(H5N1)) segment 6 neuraminidase (NA) gene, complete cds	1410	Michigan	2022-03-23
OQ966990	Influenza A virus (A/Wood Duck/Minnesota/22-009381-001/2022(H5N1)) segment 6 neuraminidase (NA) gene, complete cds	1410	Minnesota	2022-03-24
OQ966998	Influenza A virus (A/Wood Duck/Minnesota/22-011225-001/2022(H5N1)) segment 6 neuraminidase (NA) gene, complete cds	1410	Minnesota	2022-04-05
OQ967070	Influenza A virus (A/Wood Duck/Missouri/22-012338-023/2022(H5N1)) segment 6 neuraminidase (NA) gene, complete cds	1410	Missouri	2022-04-07
OQ967078	Influenza A virus (A/Wood Duck/New York/22-011188-001/2022(H5N1)) segment 6 neuraminidase (NA) gene, complete cds	1410	New York	2022-04-11
OQ967086	Influenza A virus (A/Wood Duck/North Carolina/22-003829-001/2022(H5N1)) segment 6 neuraminidase (NA) gene, complete cds	1410	North Carolina	2022-01-29
OQ967094	Influenza A virus (A/Wood Duck/Tennessee/22-005907-002/2022(H5N1)) segment 6 neuraminidase (NA) gene, complete cds	1410	Tennessee	2022-02-13
OQ967102	Influenza A virus (A/Wood Duck/Wisconsin/22-011240-001/2022(H5N1)) segment 6 neuraminidase (NA) gene, complete cds	1410	Wisconsin	2022-03-29
OQ967110	Influenza A virus (A/Wood Duck/Wisconsin/22-011820-001/2022(H5N1)) segment 6 neuraminidase (NA) gene, complete cds	1410	Wisconsin	2022-04-05

## Sheet: Canadian goose
Accession Number	Strain	Size	State/region	Isolation date
OQ957566	Influenza A virus (A/Canada Goose/Michigan/22-008506-005/2022(H5N1)) segment 6 neuraminidase (NA) gene, complete cds	1410	Michigan	March 17th, 2022
OQ960430	Influenza A virus (A/Canada Goose/Colorado/22-010377-001/2022(H5N1)) segment 6 neuraminidase (NA) gene, complete cds	1410	Colorado	April 1st, 2022
OQ960438	Influenza A virus (A/Canada Goose/Colorado/22-013125-001/2022(H5N1)) segment 6 neuraminidase (NA) gene, complete cds	1410	Colorado	April 26th, 2022
OQ960446	Influenza A virus (A/Canada Goose/Delaware/22-004745-001/2022(H5N1)) segment 6 neuraminidase (NA) gene, complete cds	1410	Delaware	February 4th, 2022
OQ960454	Influenza A virus (A/Canada Goose/Florida/22-010682-001/2022(H5N1)) segment 6 neuraminidase (NA) gene, complete cds	1410	Florida	April 5th, 2022
OQ960462	Influenza A virus (A/Canada Goose/Illinois/22-008379-001/2022(H5N1)) segment 6 neuraminidase (NA) gene, complete cds	1410	Illinois	March 16th, 2022
OQ960470	Influenza A virus (A/Canada Goose/Massachusetts/22-005893-001/2022(H5N1)) segment 6 neuraminidase (NA) gene, complete cds	1410	Massachusetts	February 3rd, 2022
OQ960478	Influenza A virus (A/Canada Goose/Massachusetts/22-005893-002/2022(H5N1)) segment 6 neuraminidase (NA) gene, complete cds	1410	Massachusetts	February 3rd, 2022
OQ960486	Influenza A virus (A/Canada Goose/Massachusetts/22-007630-001/2022(H5N1)) segment 6 neuraminidase (NA) gene, complete cds	1410	Massachusetts	March 8th, 2022
OQ960494	Influenza A virus (A/Canada Goose/Michigan/22-008506-003/2022(H5N1)) segment 6 neuraminidase (NA) gene, complete cds	1410	Michigan	March 17th, 2022
OQ960502	Influenza A virus (A/Canada Goose/Michigan/22-008506-004/2022(H5N1)) segment 6 neuraminidase (NA) gene, complete cds	1410	Michigan	March 17th, 2022
OQ960510	Influenza A virus (A/Canada Goose/Michigan/22-008506-006/2022(H5N1)) segment 6 neuraminidase (NA) gene, complete cds	1410	Michigan	March 17th, 2022
OQ960518	Influenza A virus (A/Canada Goose/Michigan/22-008506-007/2022(H5N1)) segment 6 neuraminidase (NA) gene, complete cds	1410	Michigan	March 17th, 2022
OQ960526	Influenza A virus (A/Canada Goose/Michigan/22-008506-008/2022(H5N1)) segment 6 neuraminidase (NA) gene, complete cds	1410	Michigan	March 17th, 2022
OQ960534	Influenza A virus (A/Canada Goose/Minnesota/22-009383-001/2022(H5N1)) segment 6 neuraminidase (NA) gene, complete cds	1410	Minnesota	March 25th, 2022
OQ960542	Influenza A virus (A/Canada Goose/Minnesota/22-010232-001/2022(H5N1)) segment 6 neuraminidase (NA) gene, complete cds	1410	Minnesota	March 25th, 2022
OQ960550	Influenza A virus (A/Canada Goose/Minnesota/22-010355-002/2022(H5N1)) segment 6 neuraminidase (NA) gene, complete cds	1410	Minnesota	April 5th, 2022
OQ960558	Influenza A virus (A/Canada Goose/Missouri/22-012338-008/2022(H5N1)) segment 6 neuraminidase (NA) gene, complete cds	1410	Missouri	March 18th, 2022
OQ960566	Influenza A virus (A/Canada Goose/Missouri/22-012338-010/2022(H5N1)) segment 6 neuraminidase (NA) gene, complete cds	1410	Missouri	March 18th, 2022
OQ960574	Influenza A virus (A/Canada Goose/Missouri/22-012338-014/2022(H5N1)) segment 6 neuraminidase (NA) gene, complete cds	1410	Missouri	2022-03-01
OQ960582	Influenza A virus (A/Canada Goose/Missouri/22-012338-026/2022(H5N1)) segment 6 neuraminidase (NA) gene, complete cds	1410	Missouri	2022-04-01
OQ960590	Influenza A virus (A/Canada Goose/Missouri/22-012338-029/2022(H5N1)) segment 6 neuraminidase (NA) gene, complete cds	1410	Missouri	2022-03-01
OQ960598	Influenza A virus (A/Canada Goose/Montana/22-011285-001/2022(H5N1)) segment 6 neuraminidase (NA) gene, complete cds	1410	Montana	April 11th, 2022
OQ960606	Influenza A virus (A/Canada Goose/Montana/22-012541-001/2022(H5N1)) segment 6 neuraminidase (NA) gene, complete cds	1410	Montana	April 20th, 2022
OQ960614	Influenza A virus (A/Canada Goose/Nebraska/22-007169-001/2022(H5N1)) segment 6 neuraminidase (NA) gene, complete cds	1410	Nebraska	March 7th, 2022
OQ960622	Influenza A virus (A/Canada Goose/Nebraska/22-007179-001/2022(H5N1)) segment 6 neuraminidase (NA) gene, complete cds	1410	Nebraska	March 7th, 2022
OQ960630	Influenza A virus (A/Canada Goose/New Hampshire/22-006203-001/2022(H5N1)) segment 6 neuraminidase (NA) gene, complete cds	1410	New Hampshire	February 22nd, 2022
OQ960638	Influenza A virus (A/Canada Goose/New Hampshire/22-006203-002/2022(H5N1)) segment 6 neuraminidase (NA) gene, complete cds	1410	New Hampshire	February 22nd, 2022
OQ960646	Influenza A virus (A/Canada Goose/New Hampshire/22-006203-003/2022(H5N1)) segment 6 neuraminidase (NA) gene, complete cds	1410	New Hampshire	February 22nd, 2022
OQ960654	Influenza A virus (A/Canada Goose/New Hampshire/22-010920-002/2022(H5N1)) segment 6 neuraminidase (NA) gene, complete cds	1410	New Hampshire	April 7th, 2022
OQ960662	Influenza A virus (A/Canada Goose/New York/22-009396-001/2022(H5N1)) segment 6 neuraminidase (NA) gene, complete cds	1410	New York	March 21st, 2022
OQ960670	Influenza A virus (A/Canada Goose/North Dakota/22-010036-004/2022(H5N1)) segment 6 neuraminidase (NA) gene, complete cds	1410	North Dakota	March 25th, 2022
OQ960678	Influenza A virus (A/Canada Goose/Ohio/22-007948-001/2022(H5N1)) segment 6 neuraminidase (NA) gene, complete cds	1410	Ohio	March 1st, 2022
OQ960686	Influenza A virus (A/Canada Goose/Ohio/22-008995-001/2022(H5N1)) segment 6 neuraminidase (NA) gene, complete cds	1410	Ohio	March 15th, 2022
OQ960694	Influenza A virus (A/Canada Goose/Ohio/22-008995-002/2022(H5N1)) segment 6 neuraminidase (NA) gene, complete cds	1410	Ohio	March 15th, 2022
OQ960702	Influenza A virus (A/Canada Goose/South Dakota/22-007946-003/2022(H5N1)) segment 6 neuraminidase (NA) gene, complete cds	1410	South Dakota	March 9th, 2022
OQ960710	Influenza A virus (A/Canada Goose/South Dakota/22-008382-001/2022(H5N1)) segment 6 neuraminidase (NA) gene, complete cds	1410	South Dakota	March 16th, 2022
OQ960718	Influenza A virus (A/Canada Goose/South Dakota/22-008571-001/2022(H5N1)) segment 6 neuraminidase (NA) gene, complete cds	1410	South Dakota	March 14th, 2022
OQ960726	Influenza A virus (A/Canada Goose/South Dakota/22-008571-002/2022(H5N1)) segment 6 neuraminidase (NA) gene, complete cds	1410	South Dakota	March 14th, 2022
OQ960734	Influenza A virus (A/Canada Goose/South Dakota/22-008571-003/2022(H5N1)) segment 6 neuraminidase (NA) gene, complete cds	1410	South Dakota	March 14th, 2022
OQ960742	Influenza A virus (A/Canada Goose/Tennessee/22-010667-001/2022(H5N1)) segment 6 neuraminidase (NA) gene, complete cds	1410	Tennessee	April 1st, 2022
OQ960750	Influenza A virus (A/Canada Goose/Vermont/22-012250-001/2022(H5N1)) segment 6 neuraminidase (NA) gene, complete cds	1410	Vermont	April 18th, 2022
OQ960758	Influenza A virus (A/Canada Goose/Wisconsin/22-009408-001/2022(H5N1)) segment 6 neuraminidase (NA) gene, complete cds	1410	Wisconsin	March 20th, 2022
OQ960766	Influenza A virus (A/Canada Goose/Wisconsin/22-011238-001/2022(H5N1)) segment 6 neuraminidase (NA) gene, complete cds	1410	Wisconsin	March 28th, 2022
OQ960774	Influenza A virus (A/Canada Goose/Wisconsin/22-011818-001/2022(H5N1)) segment 6 neuraminidase (NA) gene, complete cds	1410	Wisconsin	April 2nd, 2022
OQ960782	Influenza A virus (A/Canada Goose/Wisconsin/22-011819-001/2022(H5N1)) segment 6 neuraminidase (NA) gene, complete cds	1410	Wisconsin	April 4th, 2022
OQ960790	Influenza A virus (A/Canada Goose/Wyoming/22-010373-001/2022(H5N1)) segment 6 neuraminidase (NA) gene, complete cds	1410	Wyoming	March 31st, 2022
OQ960798	Influenza A virus (A/Canada Goose/Wyoming/22-011125-001/2022(H5N1)) segment 6 neuraminidase (NA) gene, complete cds	1410	Wyoming	April 10th, 2022
OQ960806	Influenza A virus (A/Canada Goose/Wyoming/22-011671-001/2022(H5N1)) segment 6 neuraminidase (NA) gene, complete cds	1410	Wyoming	April 13th, 2022
OQ960814	Influenza A virus (A/Canada Goose/Wyoming/22-012062-001/2022(H5N1)) segment 6 neuraminidase (NA) gene, complete cds	1410	Wyoming	April 18th, 2022
OQ960822	Influenza A virus (A/Canada Goose/Wyoming/22-012665-003/2022(H5N1)) segment 6 neuraminidase (NA) gene, complete cds	1410	Wyoming	April 21st, 2022

## Sheet: Misc birds
Accession Number	Species	Strain	Size	State/region	Isolation date
OR818562	Red-tailed hawk	Influenza A virus (A/red-tailed hawk/New York/NYCVH-22-8477/2022(H5N1)) segment 6 neuraminidase (NA) gene, partial cds	1407	New York	October 22nd, 2022
OR819058	Peregrine falcon	Influenza A virus (A/peregrine falcon/New York/NYCVH-160820/2022(H5N1)) segment 6 neuraminidase (NA) gene, partial cds	1407	New York	December 18th, 2022
OQ958070	Backyard bird	Influenza A virus (A/Backyard bird/Alaska/22-013107-001/2022(H5N1)) segment 6 neuraminidase (NA) gene, complete cds	1410	Alaska	April 28th, 2022
OQ958078	Backyard bird	Influenza A virus (A/Backyard bird/Alaska/22-013107-002/2022(H5N1)) segment 6 neuraminidase (NA) gene, complete cds	1410	Alaska	April 28th, 2022
OQ958086	Backyard bird	Influenza A virus (A/Backyard bird/Colorado/22-010668-001/2022(H5N1)) segment 6 neuraminidase (NA) gene, complete cds	1410	Colorado	April 7th, 2022
OQ958094	Backyard bird	Influenza A virus (A/Backyard bird/Colorado/22-011827-001/2022(H5N1)) segment 6 neuraminidase (NA) gene, complete cds	1410	Colorado	April 15th, 2022
OQ958102	Backyard bird	Influenza A virus (A/Backyard bird/Colorado/22-011827-002/2022(H5N1)) segment 6 neuraminidase (NA) gene, complete cds	1410	Colorado	April 15th, 2022
OQ958110	Backyard bird	Influenza A virus (A/Backyard bird/Connecticut/22-006118-001/2022(H5N1)) segment 6 neuraminidase (NA) gene, complete cds	1410	Connecticut	February 28th, 2022
OQ958118	Backyard bird	Influenza A virus (A/Backyard bird/Idaho/22-011775-001/2022(H5N1)) segment 6 neuraminidase (NA) gene, complete cds	1410	Idaho	April 18th, 2022
OQ958126	Backyard bird	Influenza A virus (A/Backyard bird/Idaho/22-011775-002/2022(H5N1)) segment 6 neuraminidase (NA) gene, complete cds	1410	Idaho	April 18th, 2022
OQ958134	Backyard bird	Influenza A virus (A/Backyard bird/Idaho/22-012045-001/2022(H5N1)) segment 6 neuraminidase (NA) gene, complete cds	1410	Idaho	April 18th, 2022
OQ958142	Backyard bird	Influenza A virus (A/Backyard bird/Idaho/22-012045-002/2022(H5N1)) segment 6 neuraminidase (NA) gene, complete cds	1410	Idaho	April 18th, 2022
OQ958150	Backyard bird	Influenza A virus (A/Backyard bird/Illinois/22-009720-001/2022(H5N1)) segment 6 neuraminidase (NA) gene, complete cds	1410	Illinois	2022-03-29
OQ958158	Backyard bird	Influenza A virus (A/Backyard bird/Illinois/22-009720-003/2022(H5N1)) segment 6 neuraminidase (NA) gene, complete cds	1410	Illinois	2022-03-29
OQ958166	Backyard bird	Influenza A virus (A/Backyard bird/Iowa/22-006114-001/2022(H5N1)) segment 6 neuraminidase (NA) gene, complete cds	1410	Iowa	2022-02-28
OQ958174	Backyard bird	Influenza A virus (A/Backyard bird/Iowa/22-008373-001/2022(H5N1)) segment 6 neuraminidase (NA) gene, complete cds	1410	Iowa	2022-03-19
OQ958198	Backyard bird	Influenza A virus (A/Backyard bird/Kansas/22-008114-001/2022(H5N1)) segment 6 neuraminidase (NA) gene, complete cds	1410	Kansas	2022-03-16
OQ958206	Backyard bird	Influenza A virus (A/Backyard bird/Kansas/22-008114-002/2022(H5N1)) segment 6 neuraminidase (NA) gene, complete cds	1410	Kansas	2022-03-16
OQ958246	Backyard bird	Influenza A virus (A/Backyard bird/Maine/22-005158-001/2022(H5N1)) segment 6 neuraminidase (NA) gene, complete cds	1410	Maine	2022-02-17
OQ958254	Backyard bird	Influenza A virus (A/Backyard bird/Maine/22-005443-001/2022(H5N1)) segment 6 neuraminidase (NA) gene, complete cds	1410	Maine	2022-02-20
OQ958382	Backyard bird	Influenza A virus (A/Backyard bird/Massachusetts/22-009371-001/2022(H5N1)) segment 6 neuraminidase (NA) gene, complete cds	1410	Massachusetts	2022-03-25
OQ958390	Backyard bird	Influenza A virus (A/Backyard bird/Michigan/22-005440-001/2022(H5N1)) segment 6 neuraminidase (NA) gene, complete cds	1410	Michigan	2022-02-22
OQ958398	Backyard bird	Influenza A virus (A/Backyard bird/Michigan/22-005440-002/2022(H5N1)) segment 6 neuraminidase (NA) gene, complete cds	1410	Michigan	2022-02-22
OQ958534	Backyard bird	Influenza A virus (A/Backyard bird/Minnesota/22-009181-001/2022(H5N1)) segment 6 neuraminidase (NA) gene, complete cds	1410	Minnesota	2022-03-25
OQ958542	Backyard bird	Influenza A virus (A/Backyard bird/Minnesota/22-009181-003/2022(H5N1)) segment 6 neuraminidase (NA) gene, complete cds	1410	Minnesota	2022-03-25
OQ958662	Backyard bird	Influenza A virus (A/Backyard bird/Missouri/22-006639-001/2022(H5N1)) segment 6 neuraminidase (NA) gene, complete cds	1410	Missouri	2022-03-03
OQ958670	Backyard bird	Influenza A virus (A/Backyard bird/Missouri/22-007677-001/2022(H5N1)) segment 6 neuraminidase (NA) gene, complete cds	1410	Missouri	2022-03-14
OQ958686	Backyard bird	Influenza A virus (A/Backyard bird/Montana/22-010445-001/2022(H5N1)) segment 6 neuraminidase (NA) gene, complete cds	1410	Montana	2022-04-05
OQ958694	Backyard bird	Influenza A virus (A/Backyard bird/Montana/22-010445-003/2022(H5N1)) segment 6 neuraminidase (NA) gene, complete cds	1410	Montana	2022-04-05
OQ958702	Backyard bird	Influenza A virus (A/Backyard bird/Nebraska/22-007805-001/2022(H5N1)) segment 6 neuraminidase (NA) gene, complete cds	1410	Nebraska	2022-03-14
OQ958710	Backyard bird	Influenza A virus (A/Backyard bird/Nebraska/22-007805-002/2022(H5N1)) segment 6 neuraminidase (NA) gene, complete cds	1410	Nebraska	2022-03-14
OQ958750	Backyard bird	Influenza A virus (A/Backyard bird/New Hampshire/22-007886-001/2022(H5N1)) segment 6 neuraminidase (NA) gene, complete cds	1410	New Hampshire	2022-03-15
OQ958758	Backyard bird	Influenza A virus (A/Backyard bird/New York/22-005647-001/2022(H5N1)) segment 6 neuraminidase (NA) gene, complete cds	1410	New York	2022-02-22
OQ958766	Backyard bird	Influenza A virus (A/Backyard bird/New York/22-005647-002/2022(H5N1)) segment 6 neuraminidase (NA) gene, complete cds	1410	New York	2022-02-22
OQ958830	Backyard bird	Influenza A virus (A/Backyard bird/North Carolina/22-009583-001/2022(H5N1)) segment 6 neuraminidase (NA) gene, complete cds	1410	North Carolina	2022-03-27
OQ958838	Backyard bird	Influenza A virus (A/Backyard bird/North Dakota/22-010141-001/2022(H5N1)) segment 6 neuraminidase (NA) gene, complete cds	1410	North Dakota	2022-04-04
OQ958846	Backyard bird	Influenza A virus (A/Backyard bird/North Dakota/22-010657-001/2022(H5N1)) segment 6 neuraminidase (NA) gene, complete cds	1410	North Dakota	2022-04-06
OQ958894	Backyard bird	Influenza A virus (A/Backyard bird/Ohio/22-009419-001/2022(H5N1)) segment 6 neuraminidase (NA) gene, complete cds	1410	Ohio	2022-03-26
OQ958902	Backyard bird	Influenza A virus (A/Backyard bird/South Dakota/22-009194-002/2022(H5N1)) segment 6 neuraminidase (NA) gene, complete cds	1410	South Dakota	2022-03-25
OQ958910	Backyard bird	Influenza A virus (A/Backyard bird/Virginia/22-004415-001/2022(H5N1)) segment 6 neuraminidase (NA) gene, complete cds	1410	Virginia	2022-02-11
OQ958918	Backyard bird	Influenza A virus (A/Backyard bird/Wisconsin/22-009934-002/2022(H5N1)) segment 6 neuraminidase (NA) gene, complete cds	1410	Wisconsin	2022-03-31
OQ958926	Backyard bird	Influenza A virus (A/Backyard bird/Wisconsin/22-010325-001/2022(H5N1)) segment 6 neuraminidase (NA) gene, complete cds	1410	Wisconsin	2022-04-05
OQ789277	American wigeon	Influenza A virus (A/American wigeon/South Carolina/AH0195145/2021(H5N1)) segment 6 neuraminidase (NA) gene, complete cds	1410	South Carolina	2021-12-30

## Sheet: Turkey
Accession Number	Strain	Size	State/region	Isolation date
OQ957582	Influenza A virus (A/Turkey/Minnesota/22-011787-001/2022(H5N1)) segment 6 neuraminidase (NA) gene, complete cds	1410	Minnesota	2022-04-15
OQ957590	Influenza A virus (A/Turkey/Minnesota/22-011787-002/2022(H5N1)) segment 6 neuraminidase (NA) gene, complete cds	1410	Minnesota	2022-04-15
OQ965190	Influenza A virus (A/Turkey Vulture/New York/22-011863-001/2022(H5N1)) segment 6 neuraminidase (NA) gene, complete cds	1410	New York	2022-04-12
OQ965198	Influenza A virus (A/Turkey Vulture/North Dakota/22-013134-001/2022(H5N1)) segment 6 neuraminidase (NA) gene, complete cds	1410	North Dakota	2022-04-21
OQ965206	Influenza A virus (A/Turkey Vulture/North Dakota/22-013144-001/2022(H5N1)) segment 6 neuraminidase (NA) gene, complete cds	1410	North Dakota	2022-04-21
OQ965222	Influenza A virus (A/Turkey Vulture/Vermont/22-011552-001/2022(H5N1)) segment 6 neuraminidase (NA) gene, complete cds	1410	Vermont	2022-04-12
OQ965230	Influenza A virus (A/Turkey/Indiana/22-003707-003/2022(H5N1)) segment 6 neuraminidase (NA) gene, complete cds	1410	Indiana	2022-02-07
OQ965238	Influenza A virus (A/Turkey/Indiana/22-004688-002/2022(H5N1)) segment 6 neuraminidase (NA) gene, complete cds	1410	Indiana	2022-02-14
OQ965326	Influenza A virus (A/Turkey/Iowa/22-006795-001/2022(H5N1)) segment 6 neuraminidase (NA) gene, complete cds	1410	Iowa	2022-03-06
OQ965334	Influenza A virus (A/Turkey/Iowa/22-008862-002/2022(H5N1)) segment 6 neuraminidase (NA) gene, complete cds	1410	Iowa	2022-03-23
OQ965430	Influenza A virus (A/Turkey/Kansas/22-011119-001/2022(H5N1)) segment 6 neuraminidase (NA) gene, complete cds	1410	Kansas	2022-04-09
OQ965438	Influenza A virus (A/Turkey/Kansas/22-011119-002/2022(H5N1)) segment 6 neuraminidase (NA) gene, complete cds	1410	Kansas	2022-04-09
OQ965454	Influenza A virus (A/Turkey/Kentucky/22-004546-001/2022(H5N1)) segment 6 neuraminidase (NA) gene, complete cds	1410	Kentucky	2022-02-12
OQ965462	Influenza A virus (A/Turkey/Minnesota/22-009182-001/2022(H5N1)) segment 6 neuraminidase (NA) gene, complete cds	1410	Minnesota	2022-03-25
OQ965470	Influenza A virus (A/Turkey/Minnesota/22-009182-002/2022(H5N1)) segment 6 neuraminidase (NA) gene, complete cds	1410	Minnesota	2022-03-25
OQ966142	Influenza A virus (A/Turkey/Missouri/22-006944-002/2022(H5N1)) segment 6 neuraminidase (NA) gene, complete cds	1410	Missouri	2022-03-07
OQ966150	Influenza A virus (A/Turkey/Missouri/22-007087-001/2022(H5N1)) segment 6 neuraminidase (NA) gene, complete cds	1410	Missouri	2022-03-08
OQ966182	Influenza A virus (A/Turkey/North Carolina/22-009332-001/2022(H5N1)) segment 6 neuraminidase (NA) gene, complete cds	1410	North Carolina	2022-03-27
OQ966190	Influenza A virus (A/Turkey/North Carolina/22-009981-001/2022(H5N1)) segment 6 neuraminidase (NA) gene, complete cds	1410	North Carolina	2022-03-31
OQ966302	Influenza A virus (A/Turkey/North Dakota/22-009840-001/2022(H5N1)) segment 6 neuraminidase (NA) gene, complete cds	1410	North Dakota	2022-03-30
OQ966310	Influenza A virus (A/Turkey/North Dakota/22-009978-001/2022(H5N1)) segment 6 neuraminidase (NA) gene, complete cds	1410	North Dakota	2022-04-01
OQ966342	Influenza A virus (A/Turkey/South Dakota/22-006792-001/2022(H5N1)) segment 6 neuraminidase (NA) gene, complete cds	1410	South Dakota	2022-03-04
OQ966350	Influenza A virus (A/Turkey/South Dakota/22-006792-002/2022(H5N1)) segment 6 neuraminidase (NA) gene, complete cds	1410	South Dakota	2022-03-04
OQ966734	Influenza A virus (A/Turkey/Utah/22-012960-001/2022(H5N1)) segment 6 neuraminidase (NA) gene, complete cds	1410	Utah	2022-04-26
OQ966742	Influenza A virus (A/Turkey/Wisconsin/22-010935-001/2022(H5N1)) segment 6 neuraminidase (NA) gene, complete cds	1410	Wisconsin	2022-04-10
OQ966750	Influenza A virus (A/Turkey/Wisconsin/22-010935-002/2022(H5N1)) segment 6 neuraminidase (NA) gene, complete cds	1410	Wisconsin	2022-04-10
OQ966870	Influenza A virus (A/Wild Turkey/Montana/22-012657-001/2022(H5N1)) segment 6 neuraminidase (NA) gene, complete cds	1410	Montana	2022-04-12
OQ966878	Influenza A virus (A/Wild Turkey/Montana/22-012657-002/2022(H5N1)) segment 6 neuraminidase (NA) gene, complete cds	1410	Montana	2022-04-12
OQ966886	Influenza A virus (A/Wild Turkey/Wyoming/22-011426-001/2022(H5N1)) segment 6 neuraminidase (NA) gene, complete cds	1410	Wyoming	2022-04-01
OQ966894	Influenza A virus (A/Wild Turkey/Wyoming/22-011426-003/2022(H5N1)) segment 6 neuraminidase (NA) gene, complete cds	1410	Wyoming	2022-04-01
