# Supplementary material for: Artificial Intelligence-Guided Design of some Pan-H5N1-clade 2.3.4.4b Mosaic DNA-based vaccines to combat the circulating HPAI in birds
Source: Research Square preprint supplement (doi:10.21203/rs.3.rs-6711963/v1), 2025-05-23
Supplement: Supplementary file 2 [file aae6d4002eef5bdb5c557676.xlsx]

## Sheet: 1. H5N1 - HA - Chicken
Acc. No.	Name	Size	State - Country	collection_date
PV370534	Influenza A virus (A/chicken/Larimer-BYC/2.3.4.4b/2022(H5N1)) segment 4 hemagglutinin (HA) gene, complete cds	1763	Larimer-BYC	2022-01-01
OR819337	Influenza A virus (A/chicken/New York/NYCVH-168127/2023(H5N1)) segment 4 hemagglutinin (HA) gene, complete cds	1720	New York	2023-04-09
OQ967116	Influenza A virus (A/chicken/Colorado/22-011826-001/2022(H5N1)) segment 4 hemagglutinin (HA) gene, complete cds	1704	Colorado	2022-04-15
OQ967124	Influenza A virus (A/chicken/Colorado/22-011826-002/2022(H5N1)) segment 4 hemagglutinin (HA) gene, complete cds	1704	Colorado	2022-04-15
OQ967132	Influenza A virus (A/chicken/Colorado/22-012308-001/2022(H5N1)) segment 4 hemagglutinin (HA) gene, complete cds	1704	Colorado	2022-04-19
OQ967140	Influenza A virus (A/chicken/Colorado/22-012308-002/2022(H5N1)) segment 4 hemagglutinin (HA) gene, complete cds	1704	Colorado	2022-04-19
OQ967148	Influenza A virus (A/chicken/Colorado/22-012308-003/2022(H5N1)) segment 4 hemagglutinin (HA) gene, complete cds	1704	Colorado	2022-04-19
OQ967156	Influenza A virus (A/chicken/Colorado/22-013057-001/2022(H5N1)) segment 4 hemagglutinin (HA) gene, complete cds	1704	Colorado	2022-04-28
OQ967164	Influenza A virus (A/chicken/Delaware/22-005260-001/2022(H5N1)) segment 4 hemagglutinin (HA) gene, complete cds	1704	Delaware	2022-02-21
OQ967172	Influenza A virus (A/chicken/Delaware/22-006945-001/2022(H5N1)) segment 4 hemagglutinin (HA) gene, complete cds	1704	Delaware	2022-03-07
OQ967180	Influenza A virus (A/chicken/Delaware/22-006945-002/2022(H5N1)) segment 4 hemagglutinin (HA) gene, complete cds	1704	Delaware	2022-03-07
OQ967188	Influenza A virus (A/chicken/Delaware/22-006945-003/2022(H5N1)) segment 4 hemagglutinin (HA) gene, complete cds	1704	Delaware	2022-03-07
OQ967196	Influenza A virus (A/chicken/Delaware/22-006945-004/2022(H5N1)) segment 4 hemagglutinin (HA) gene, complete cds	1704	Delaware	2022-03-07
OQ967204	Influenza A virus (A/chicken/Delaware/22-008054-001/2022(H5N1)) segment 4 hemagglutinin (HA) gene, complete cds	1704	Delaware	2022-03-16
OQ967212	Influenza A virus (A/chicken/Delaware/22-008054-003/2022(H5N1)) segment 4 hemagglutinin (HA) gene, complete cds	1704	Delaware	2022-03-16
OQ967220	Influenza A virus (A/chicken/Delaware/22-008054-004/2022(H5N1)) segment 4 hemagglutinin (HA) gene, complete cds	1704	Delaware	2022-03-16
OQ967228	Influenza A virus (A/chicken/Idaho/22-011336-001/2022(H5N1)) segment 4 hemagglutinin (HA) gene, complete cds	1704	Idaho	2022-04-13
OQ967236	Influenza A virus (A/chicken/Idaho/22-011347-002/2022(H5N1)) segment 4 hemagglutinin (HA) gene, complete cds	1704	Idaho	2022-04-14
OQ967244	Influenza A virus (A/chicken/Idaho/22-011347-004/2022(H5N1)) segment 4 hemagglutinin (HA) gene, complete cds	1704	Idaho	2022-04-14
OQ967252	Influenza A virus (A/chicken/Idaho/22-011347-005/2022(H5N1)) segment 4 hemagglutinin (HA) gene, complete cds	1704	Idaho	2022-04-14
OQ967260	Influenza A virus (A/chicken/Indiana/22-012933-001/2022(H5N1)) segment 4 hemagglutinin (HA) gene, complete cds	1704	Indiana	2022-04-23
OQ967268	Influenza A virus (A/chicken/Iowa/22-007376-001/2022(H5N1)) segment 4 hemagglutinin (HA) gene, complete cds	1704	Iowa	2022-03-10
OQ967276	Influenza A virus (A/chicken/Iowa/22-007376-003/2022(H5N1)) segment 4 hemagglutinin (HA) gene, complete cds	1704	Iowa	2022-03-10
OQ967284	Influenza A virus (A/chicken/Iowa/22-007376-005/2022(H5N1)) segment 4 hemagglutinin (HA) gene, complete cds	1704	Iowa	2022-03-10
OQ967292	Influenza A virus (A/chicken/Iowa/22-007376-007/2022(H5N1)) segment 4 hemagglutinin (HA) gene, complete cds	1704	Iowa	2022-03-10
OQ967300	Influenza A virus (A/chicken/Iowa/22-007376-012/2022(H5N1)) segment 4 hemagglutinin (HA) gene, complete cds	1704	Iowa	2022-03-10
OQ967308	Influenza A virus (A/chicken/Iowa/22-008176-003/2022(H5N1)) segment 4 hemagglutinin (HA) gene, complete cds	1704	Iowa	2022-03-17
OQ967316	Influenza A virus (A/chicken/Iowa/22-008176-004/2022(H5N1)) segment 4 hemagglutinin (HA) gene, complete cds	1704	Iowa	2022-03-17
OQ967324	Influenza A virus (A/chicken/Iowa/22-008176-005/2022(H5N1)) segment 4 hemagglutinin (HA) gene, complete cds	1704	Iowa	2022-03-17
OQ967332	Influenza A virus (A/chicken/Iowa/22-009180-001/2022(H5N1)) segment 4 hemagglutinin (HA) gene, complete cds	1704	Iowa	2022-03-25
OQ967340	Influenza A virus (A/chicken/Iowa/22-009180-002/2022(H5N1)) segment 4 hemagglutinin (HA) gene, complete cds	1704	Iowa	2022-03-25
OQ967348	Influenza A virus (A/chicken/Iowa/22-009287-001/2022(H5N1)) segment 4 hemagglutinin (HA) gene, complete cds	1704	Iowa	2022-03-28
OQ967356	Influenza A virus (A/chicken/Iowa/22-009819-001/2022(H5N1)) segment 4 hemagglutinin (HA) gene, complete cds	1704	Iowa	2022-03-31
OQ967364	Influenza A virus (A/chicken/Iowa/22-009819-002/2022(H5N1)) segment 4 hemagglutinin (HA) gene, complete cds	1704	Iowa	2022-03-31
OQ967372	Influenza A virus (A/chicken/Iowa/22-009985-001/2022(H5N1)) segment 4 hemagglutinin (HA) gene, complete cds	1704	Iowa	2022-04-01
OQ967380	Influenza A virus (A/chicken/Kentucky/22-004416-001/2022(H5N1)) segment 4 hemagglutinin (HA) gene, complete cds	1704	Kentucky	2022-02-11
OQ967388	Influenza A virus (A/chicken/Kentucky/22-004416-002/2022(H5N1)) segment 4 hemagglutinin (HA) gene, complete cds	1704	Kentucky	2022-02-11
OQ967396	Influenza A virus (A/chicken/Kentucky/22-004416-003/2022(H5N1)) segment 4 hemagglutinin (HA) gene, complete cds	1704	Kentucky	2022-02-11
OQ967404	Influenza A virus (A/chicken/Maryland/22-006578-001/2022(H5N1)) segment 4 hemagglutinin (HA) gene, complete cds	1704	Maryland	2022-03-03
OQ967412	Influenza A virus (A/chicken/Maryland/22-006578-002/2022(H5N1)) segment 4 hemagglutinin (HA) gene, complete cds	1704	Maryland	2022-03-03
OQ967420	Influenza A virus (A/chicken/Maryland/22-006578-005/2022(H5N1)) segment 4 hemagglutinin (HA) gene, complete cds	1704	Maryland	2022-03-03
OQ967428	Influenza A virus (A/chicken/Maryland/22-006578-013/2022(H5N1)) segment 4 hemagglutinin (HA) gene, complete cds	1704	Maryland	2022-03-03
OQ967436	Influenza A virus (A/chicken/Maryland/22-006578-014/2022(H5N1)) segment 4 hemagglutinin (HA) gene, complete cds	1704	Maryland	2022-03-03
OQ967444	Influenza A virus (A/chicken/Maryland/22-006948-001/2022(H5N1)) segment 4 hemagglutinin (HA) gene, complete cds	1704	Maryland	2022-03-04
OQ967452	Influenza A virus (A/chicken/Maryland/22-007086-001/2022(H5N1)) segment 4 hemagglutinin (HA) gene, complete cds	1704	Maryland	2022-03-07
OQ967460	Influenza A virus (A/chicken/Maryland/22-007273-001/2022(H5N1)) segment 4 hemagglutinin (HA) gene, complete cds	1704	Maryland	2022-03-08
OQ967468	Influenza A virus (A/chicken/Maryland/22-007273-002/2022(H5N1)) segment 4 hemagglutinin (HA) gene, complete cds	1704	Maryland	2022-03-08
OQ967476	Influenza A virus (A/chicken/Maryland/22-007273-003/2022(H5N1)) segment 4 hemagglutinin (HA) gene, complete cds	1704	Maryland	2022-03-08
OQ967484	Influenza A virus (A/chicken/Maryland/22-007273-004/2022(H5N1)) segment 4 hemagglutinin (HA) gene, complete cds	1704	Maryland	2022-03-08
OQ967492	Influenza A virus (A/chicken/Maryland/22-007273-005/2022(H5N1)) segment 4 hemagglutinin (HA) gene, complete cds	1704	Maryland	2022-03-08
OQ967500	Influenza A virus (A/chicken/Maryland/22-008243-001/2022(H5N1)) segment 4 hemagglutinin (HA) gene, complete cds	1704	Maryland	2022-03-17
OQ967508	Influenza A virus (A/chicken/Michigan/22-011627-001/2022(H5N1)) segment 4 hemagglutinin (HA) gene, complete cds	1704	Michigan	2022-04-13
OQ967516	Influenza A virus (A/chicken/Michigan/22-012855-001/2022(H5N1)) segment 4 hemagglutinin (HA) gene, complete cds	1704	Michigan	2022-04-25
OQ967524	Influenza A virus (A/chicken/Michigan/22-012855-002/2022(H5N1)) segment 4 hemagglutinin (HA) gene, complete cds	1704	Michigan	2022-04-25
OQ967532	Influenza A virus (A/chicken/Michigan/22-012855-003/2022(H5N1)) segment 4 hemagglutinin (HA) gene, complete cds	1704	Michigan	2022-04-25
OQ967540	Influenza A virus (A/chicken/Michigan/22-012855-004/2022(H5N1)) segment 4 hemagglutinin (HA) gene, complete cds	1704	Michigan	2022-04-25
OQ967548	Influenza A virus (A/chicken/Michigan/22-012855-005/2022(H5N1)) segment 4 hemagglutinin (HA) gene, complete cds	1704	Michigan	2022-04-25
OQ967556	Influenza A virus (A/chicken/Michigan/22-012977-001/2022(H5N1)) segment 4 hemagglutinin (HA) gene, complete cds	1704	Michigan	2022-04-26
OQ967564	Influenza A virus (A/chicken/Michigan/22-013224-001/2022(H5N1)) segment 4 hemagglutinin (HA) gene, complete cds	1704	Michigan	2022-04-29
OQ967572	Influenza A virus (A/chicken/Minnesota/22-010993-001/2022(H5N1)) segment 4 hemagglutinin (HA) gene, complete cds	1704	Minnesota	2022-04-10
OQ967580	Influenza A virus (A/chicken/Minnesota/22-010993-004/2022(H5N1)) segment 4 hemagglutinin (HA) gene, complete cds	1704	Minnesota	2022-04-10
OQ967588	Influenza A virus (A/chicken/Minnesota/22-010994-001/2022(H5N1)) segment 4 hemagglutinin (HA) gene, complete cds	1704	Minnesota	2022-04-10
OQ967596	Influenza A virus (A/chicken/Minnesota/22-012373-001/2022(H5N1)) segment 4 hemagglutinin (HA) gene, complete cds	1704	Minnesota	2022-04-21
OQ967604	Influenza A virus (A/chicken/Minnesota/22-012932-001/2022(H5N1)) segment 4 hemagglutinin (HA) gene, complete cds	1704	Minnesota	2022-04-26
OQ967612	Influenza A virus (A/chicken/Minnesota/22-012966-001/2022(H5N1)) segment 4 hemagglutinin (HA) gene, complete cds	1704	Minnesota	2022-04-26
OQ967620	Influenza A virus (A/chicken/Missouri/22-006569-001/2022(H5N1)) segment 4 hemagglutinin (HA) gene, complete cds	1704	Missouri	2022-03-02
OQ967628	Influenza A virus (A/chicken/Missouri/22-006569-004/2022(H5N1)) segment 4 hemagglutinin (HA) gene, complete cds	1704	Missouri	2022-03-02
OQ967636	Influenza A virus (A/chicken/Missouri/22-006569-005/2022(H5N1)) segment 4 hemagglutinin (HA) gene, complete cds	1704	Missouri	2022-03-02
OQ967644	Influenza A virus (A/chicken/Missouri/22-006569-007/2022(H5N1)) segment 4 hemagglutinin (HA) gene, complete cds	1704	Missouri	2022-03-02
OQ967652	Influenza A virus (A/chicken/Montana/22-010923-004/2022(H5N1)) segment 4 hemagglutinin (HA) gene, complete cds	1704	Montana	2022-04-09
OQ967660	Influenza A virus (A/chicken/Montana/22-010923-006/2022(H5N1)) segment 4 hemagglutinin (HA) gene, complete cds	1704	Montana	2022-04-09
OQ967668	Influenza A virus (A/chicken/Montana/22-012040-001/2022(H5N1)) segment 4 hemagglutinin (HA) gene, complete cds	1704	Montana	2022-04-19
OQ967676	Influenza A virus (A/chicken/Montana/22-012040-003/2022(H5N1)) segment 4 hemagglutinin (HA) gene, complete cds	1704	Montana	2022-04-19
OQ967684	Influenza A virus (A/chicken/Montana/22-012540-001/2022(H5N1)) segment 4 hemagglutinin (HA) gene, complete cds	1704	Montana	2022-04-22
OQ967692	Influenza A virus (A/chicken/Montana/22-013053-001/2022(H5N1)) segment 4 hemagglutinin (HA) gene, complete cds	1704	Montana	2022-04-28
OQ967700	Influenza A virus (A/chicken/Montana/22-013053-002/2022(H5N1)) segment 4 hemagglutinin (HA) gene, complete cds	1704	Montana	2022-04-28
OQ967708	Influenza A virus (A/chicken/Montana/22-013056-002/2022(H5N1)) segment 4 hemagglutinin (HA) gene, complete cds	1704 bp	Montana	2022-04-28
OQ967716	Influenza A virus (A/chicken/Nebraska/22-008467-001/2022(H5N1)) segment 4 hemagglutinin (HA) gene, complete cds	1704 bp	Nebraska	2022-03-21
OQ967724	Influenza A virus (A/chicken/Nebraska/22-009006-001/2022(H5N1)) segment 4 hemagglutinin (HA) gene, complete cds	1704 bp	Nebraska	2022-03-23
OQ967732	Influenza A virus (A/chicken/Nebraska/22-010905-001/2022(H5N1)) segment 4 hemagglutinin (HA) gene, complete cds	1704 bp	Nebraska	2022-04-11
OQ967740	Influenza A virus (A/chicken/Nebraska/22-012756-001/2022(H5N1)) segment 4 hemagglutinin (HA) gene, complete cds	1704 bp	Nebraska	2022-04-26
OQ967748	Influenza A virus (A/chicken/North Carolina/22-010298-001/2022(H5N1)) segment 4 hemagglutinin (HA) gene, complete cds	1704 bp	North Carolina	2022-04-04
OQ967756	Influenza A virus (A/chicken/North Carolina/22-010298-002/2022(H5N1)) segment 4 hemagglutinin (HA) gene, complete cds	1704 bp	North Carolina	2022-04-04
OQ967764	Influenza A virus (A/chicken/North Carolina/22-010299-002/2022(H5N1)) segment 4 hemagglutinin (HA) gene, complete cds	1704 bp	North Carolina	2022-04-04
OQ967772	Influenza A virus (A/chicken/North Carolina/22-010929-001/2022(H5N1)) segment 4 hemagglutinin (HA) gene, complete cds	1704 bp	North Carolina	2022-04-11
OQ967780	Influenza A virus (A/chicken/North Carolina/22-010929-002/2022(H5N1)) segment 4 hemagglutinin (HA) gene, complete cds	1704 bp	North Carolina	2022-04-11
OQ967788	Influenza A virus (A/chicken/North Carolina/22-010929-007/2022(H5N1)) segment 4 hemagglutinin (HA) gene, complete cds	1704 bp	North Carolina	2022-04-11
OQ967796	Influenza A virus (A/chicken/North Dakota/22-009337-001/2022(H5N1)) segment 4 hemagglutinin (HA) gene, complete cds	1704 bp	North Dakota	2022-03-28
OQ967804	Influenza A virus (A/chicken/North Dakota/22-009677-001/2022(H5N1)) segment 4 hemagglutinin (HA) gene, complete cds	1704 bp	North Dakota	2022-03-30
OQ967812	Influenza A virus (A/chicken/North Dakota/22-011109-001/2022(H5N1)) segment 4 hemagglutinin (HA) gene, complete cds	1704 bp	North Dakota	2022-04-11
OQ967820	Influenza A virus (A/chicken/North Dakota/22-011286-001/2022(H5N1)) segment 4 hemagglutinin (HA) gene, complete cds	1704 bp	North Dakota	2022-04-12
OQ967828	Influenza A virus (A/chicken/North Dakota/22-012538-001/2022(H5N1)) segment 4 hemagglutinin (HA) gene, complete cds	1704 bp	North Dakota	2022-04-25
OQ967836	Influenza A virus (A/chicken/North Dakota/22-012538-002/2022(H5N1)) segment 4 hemagglutinin (HA) gene, complete cds	1704 bp	North Dakota	2022-04-25
OQ967844	Influenza A virus (A/chicken/Oklahoma/22-013220-001/2022(H5N1)) segment 4 hemagglutinin (HA) gene, complete cds	1704 bp	Oklahoma	2022-04-28
OQ967852	Influenza A virus (A/chicken/Pennsylvania/22-011531-001/2022(H5N1)) segment 4 hemagglutinin (HA) gene, complete cds	1704 bp	Pennsylvania	2022-04-14
OQ967860	Influenza A virus (A/chicken/Pennsylvania/22-011531-005/2022(H5N1)) segment 4 hemagglutinin (HA) gene, complete cds	1704 bp	Pennsylvania	2022-04-14
OQ967868	Influenza A virus (A/chicken/Pennsylvania/22-011531-006/2022(H5N1)) segment 4 hemagglutinin (HA) gene, complete cds	1704 bp	Pennsylvania	2022-04-14
OQ967876	Influenza A virus (A/chicken/Pennsylvania/22-011767-001/2022(H5N1)) segment 4 hemagglutinin (HA) gene, complete cds	1704 bp	Pennsylvania	2022-04-16
OQ967884	Influenza A virus (A/chicken/Pennsylvania/22-011920-001/2022(H5N1)) segment 4 hemagglutinin (HA) gene, complete cds	1704 bp	Pennsylvania	2022-04-18
OQ967892	Influenza A virus (A/chicken/Pennsylvania/22-011921-002/2022(H5N1)) segment 4 hemagglutinin (HA) gene, complete cds	1704 bp	Pennsylvania	2022-04-18
OQ967900	Influenza A virus (A/chicken/Pennsylvania/22-012091-001/2022(H5N1)) segment 4 hemagglutinin (HA) gene, complete cds	1704 bp	Pennsylvania	2022-04-19
OQ967908	Influenza A virus (A/chicken/Pennsylvania/22-012092-003/2022(H5N1)) segment 4 hemagglutinin (HA) gene, complete cds	1704 bp	Pennsylvania	2022-04-19
OQ967916	Influenza A virus (A/chicken/Pennsylvania/22-012092-005/2022(H5N1)) segment 4 hemagglutinin (HA) gene, complete cds	1704 bp	Pennsylvania	2022-04-19
OQ967924	Influenza A virus (A/chicken/Pennsylvania/22-012092-007/2022(H5N1)) segment 4 hemagglutinin (HA) gene, complete cds	1704 bp	Pennsylvania	2022-04-19
OQ967932	Influenza A virus (A/chicken/Pennsylvania/22-012092-008/2022(H5N1)) segment 4 hemagglutinin (HA) gene, complete cds	1704 bp	Pennsylvania	2022-04-19
OQ967940	Influenza A virus (A/chicken/Pennsylvania/22-012248-001/2022(H5N1)) segment 4 hemagglutinin (HA) gene, complete cds	1704 bp	Pennsylvania	2022-04-19
OQ967948	Influenza A virus (A/chicken/Pennsylvania/22-012578-004/2022(H5N1)) segment 4 hemagglutinin (HA) gene, complete cds	1704 bp	Pennsylvania	2022-04-25
OQ967956	Influenza A virus (A/chicken/Pennsylvania/22-012742-001/2022(H5N1)) segment 4 hemagglutinin (HA) gene, complete cds	1704 bp	Pennsylvania	2022-04-26
OQ967964	Influenza A virus (A/chicken/Utah/22-011468-001/2022(H5N1)) segment 4 hemagglutinin (HA) gene, complete cds	1704 bp	Utah	2022-04-14
OQ967972	Influenza A virus (A/chicken/Utah/22-011468-002/2022(H5N1)) segment 4 hemagglutinin (HA) gene, complete cds	1704 bp	Utah	2022-04-14
OQ967980	Influenza A virus (A/chicken/Utah/22-012375-001/2022(H5N1)) segment 4 hemagglutinin (HA) gene, complete cds	1704 bp	Utah	2022-04-21
OQ967988	Influenza A virus (A/chicken/Wisconsin/22-007545-001/2022(H5N1)) segment 4 hemagglutinin (HA) gene, complete cds	1704 bp	Wisconsin	2022-03-13
OQ967996	Influenza A virus (A/chicken/Wisconsin/22-007545-004/2022(H5N1)) segment 4 hemagglutinin (HA) gene, complete cds	1704 bp	Wisconsin	2022-03-13
OQ968004	Influenza A virus (A/chicken/Wisconsin/22-007545-005/2022(H5N1)) segment 4 hemagglutinin (HA) gene, complete cds	1704 bp	Wisconsin	2022-03-13
OQ968012	Influenza A virus (A/chicken/Wisconsin/22-011334-002/2022(H5N1)) segment 4 hemagglutinin (HA) gene, complete cds	1704 bp	Wisconsin	2022-04-13

## Sheet: 2. H5N1 - HA - Duck
	Acc. No.	Name	Size	State - Country	collection_date
	OQ957612	Influenza A virus (A/American Black Duck/Connecticut/22-005000-001/2022(H5N1)) segment 4 hemagglutinin (HA) gene, complete cds	1704	Connecticut	2022-02-06
	OQ957620	Influenza A virus (A/American Black Duck/Connecticut/22-005313-006/2022(H5N1)) segment 4 hemagglutinin (HA) gene, complete cds	1704	Connecticut	2022-02-16
	OQ957628	Influenza A virus (A/American Black Duck/Connecticut/22-005313-007/2022(H5N1)) segment 4 hemagglutinin (HA) gene, complete cds	1704	Connecticut	2022-02-16
	OQ957636	Influenza A virus (A/American Black Duck/Connecticut/22-005313-008/2022(H5N1)) segment 4 hemagglutinin (HA) gene, complete cds	1704	Connecticut	2022-02-16
	OQ957644	Influenza A virus (A/American Black Duck/Ohio/22-009205-005/2022(H5N1)) segment 4 hemagglutinin (HA) gene, complete cds	1704	Ohio	2022-03-04
	OQ957652	Influenza A virus (A/American Black Duck/Ohio/22-009205-010/2022(H5N1)) segment 4 hemagglutinin (HA) gene, complete cds	1704	Ohio	2022-03-04
	OQ957660	Influenza A virus (A/American Black Duck/Ohio/22-009209-007/2022(H5N1)) segment 4 hemagglutinin (HA) gene, complete cds	1704	Ohio	2022-03-09
	OQ960924	Influenza A virus (A/Duck/Florida/22-006447-001/2022(H5N1)) segment 4 hemagglutinin (HA) gene, complete cds	1704	Florida	2022-03-03
	OQ960932	Influenza A virus (A/Duck/Idaho/22-012046-001/2022(H5N1)) segment 4 hemagglutinin (HA) gene, complete cds	1704	Idaho	2022-04-18
	OQ960940	Influenza A virus (A/Duck/Idaho/22-012047-001/2022(H5N1)) segment 4 hemagglutinin (HA) gene, complete cds	1704	Idaho	2022-04-18
	OQ960948	Influenza A virus (A/Duck/Indiana/22-010611-001/2022(H5N1)) segment 4 hemagglutinin (HA) gene, complete cds	1704	Indiana	2022-04-07
	OQ960956	Influenza A virus (A/Duck/Indiana/22-010624-001/2022(H5N1)) segment 4 hemagglutinin (HA) gene, complete cds	1704	Indiana	2022-04-07
	OQ960964	Influenza A virus (A/Duck/Indiana/22-011343-001/2022(H5N1)) segment 4 hemagglutinin (HA) gene, complete cds	1704	Indiana	2022-04-12
	OQ960972	Influenza A virus (A/Duck/Indiana/22-011946-002/2022(H5N1)) segment 4 hemagglutinin (HA) gene, complete cds	1704	Indiana	2022-04-17
	OQ960980	Influenza A virus (A/Duck/Indiana/22-011946-004/2022(H5N1)) segment 4 hemagglutinin (HA) gene, complete cds	1704	Indiana	2022-04-17
	OQ960988	Influenza A virus (A/Duck/Montana/22-010454-001/2022(H5N1)) segment 4 hemagglutinin (HA) gene, complete cds	1704	Montana	2022-04-06
	OQ960996	Influenza A virus (A/Duck/Montana/22-010454-003/2022(H5N1)) segment 4 hemagglutinin (HA) gene, complete cds	1704	Montana	2022-04-06
	OQ961004	Influenza A virus (A/Duck/Montana/22-012040-005/2022(H5N1)) segment 4 hemagglutinin (HA) gene, complete cds	1704	Montana	2022-04-19
	OQ961012	Influenza A virus (A/Duck/Montana/22-012040-007/2022(H5N1)) segment 4 hemagglutinin (HA) gene, complete cds	1704	Montana	2022-04-19
	OQ961020	Influenza A virus (A/Duck/Montana/22-013055-005/2022(H5N1)) segment 4 hemagglutinin (HA) gene, complete cds	1704	Montana	2022-04-27
	OQ961028	Influenza A virus (A/Duck/Montana/22-013055-006/2022(H5N1)) segment 4 hemagglutinin (HA) gene, complete cds	1704	Montana	2022-04-27
	OQ961036	Influenza A virus (A/Duck/Montana/22-013055-007/2022(H5N1)) segment 4 hemagglutinin (HA) gene, complete cds	1704	Montana	2022-04-27
	OQ961044	Influenza A virus (A/Duck/Pennsylvania/22-013189-003/2022(H5N1)) segment 4 hemagglutinin (HA) gene, complete cds	1704	Pennsylvania	2022-04-28
	OQ961052	Influenza A virus (A/Duck/Pennsylvania/22-013189-004/2022(H5N1)) segment 4 hemagglutinin (HA) gene, complete cds	1704	Pennsylvania	2022-04-28
	OQ962588	Influenza A virus (A/Muscovy Duck/Florida/22-010679-002/2022(H5N1)) segment 4 hemagglutinin (HA) gene, complete cds	1704	Florida	2022-04-04
	OQ962596	Influenza A virus (A/Muscovy Duck/Florida/22-010679-003/2022(H5N1)) segment 4 hemagglutinin (HA) gene, complete cds	1704	Florida	2022-04-04
	OQ962604	Influenza A virus (A/Muscovy Duck/Florida/22-010682-002/2022(H5N1)) segment 4 hemagglutinin (HA) gene, complete cds	1704	Florida	2022-04-05
	OQ963268	Influenza A virus (A/Ring-necked Duck/Michigan/22-009361-006/2022(H5N1)) segment 4 hemagglutinin (HA) gene, complete cds	1704	Michigan	2022-03-23
	OQ963276	Influenza A virus (A/Ring-necked Duck/Michigan/22-009361-011/2022(H5N1)) segment 4 hemagglutinin (HA) gene, complete cds	1704	Michigan	2022-03-23
	OQ963292	Influenza A virus (A/Ring-necked Duck/Missouri/22-012338-025/2022(H5N1)) segment 4 hemagglutinin (HA) gene, complete cds	1704	Missouri	2022-03-11
	OQ966956	Influenza A virus (A/Wood Duck/Michigan/22-009361-014/2022(H5N1)) segment 4 hemagglutinin (HA) gene, complete cds	1704	Michigan	2022-03-23
	OQ966964	Influenza A virus (A/Wood Duck/Michigan/22-009361-015/2022(H5N1)) segment 4 hemagglutinin (HA) gene, complete cds	1704	Michigan	2022-03-23
	OQ966988	Influenza A virus (A/Wood Duck/Minnesota/22-009381-001/2022(H5N1)) segment 4 hemagglutinin (HA) gene, complete cds	1704	Minnesota	2022-03-24
	OQ966996	Influenza A virus (A/Wood Duck/Minnesota/22-011225-001/2022(H5N1)) segment 4 hemagglutinin (HA) gene, complete cds	1704	Minnesota	2022-04-05
	OQ967068	Influenza A virus (A/Wood Duck/Missouri/22-012338-023/2022(H5N1)) segment 4 hemagglutinin (HA) gene, complete cds	1704	Missouri	2022-04-07
	OQ967076	Influenza A virus (A/Wood Duck/New York/22-011188-001/2022(H5N1)) segment 4 hemagglutinin (HA) gene, complete cds	1704	New York	2022-04-11
	OQ967084	Influenza A virus (A/Wood Duck/North Carolina/22-003829-001/2022(H5N1)) segment 4 hemagglutinin (HA) gene, complete cds	1704	North Carolina	2022-01-29
	OQ967092	Influenza A virus (A/Wood Duck/Tennessee/22-005907-002/2022(H5N1)) segment 4 hemagglutinin (HA) gene, complete cds	1704	Tennessee	2022-02-13
	OQ967100	Influenza A virus (A/Wood Duck/Wisconsin/22-011240-001/2022(H5N1)) segment 4 hemagglutinin (HA) gene, complete cds	1704	Wisconsin	2022-03-29
	OQ967108	Influenza A virus (A/Wood Duck/Wisconsin/22-011820-001/2022(H5N1)) segment 4 hemagglutinin (HA) gene, complete cds	1704	Wisconsin	2022-04-05

## Sheet: 3. H5N1 - HA - Canadian Goose
Accession Number	Strain	Size	Country	State/region	Isolation date
OQ957564	Influenza A virus (A/Canada Goose/Michigan/22-008506-005/2022(H5N1)) segment 4 hemagglutinin (HA) gene, complete cds	1704 bp	USA	Michigan	March 17th, 2022
OQ960428	Influenza A virus (A/Canada Goose/Colorado/22-010377-001/2022(H5N1)) segment 4 hemagglutinin (HA) gene, complete cds	1704 bp	USA	Colorado	April 1st, 2022
OQ960436	Influenza A virus (A/Canada Goose/Colorado/22-013125-001/2022(H5N1)) segment 4 hemagglutinin (HA) gene, complete cds	1704 bp	USA	Colorado	April 26th, 2022
OQ960444	Influenza A virus (A/Canada Goose/Delaware/22-004745-001/2022(H5N1)) segment 4 hemagglutinin (HA) gene, complete cds	1704 bp	USA	Delaware	February 2nd, 2022
OQ960452	Influenza A virus (A/Canada Goose/Florida/22-010682-001/2022(H5N1)) segment 4 hemagglutinin (HA) gene, complete cds	1704 bp	USA	Florida	April 5th, 2022
OQ960460	Influenza A virus (A/Canada Goose/Illinois/22-008379-001/2022(H5N1)) segment 4 hemagglutinin (HA) gene, complete cds	1704 bp	USA	Illinois	March 16th, 2022
OQ960468	Influenza A virus (A/Canada Goose/Massachusetts/22-005893-001/2022(H5N1)) segment 4 hemagglutinin (HA) gene, complete cds	1704 bp	USA	Massachusetts	February 3rd, 2022
OQ960476	Influenza A virus (A/Canada Goose/Massachusetts/22-005893-002/2022(H5N1)) segment 4 hemagglutinin (HA) gene, complete cds	1704 bp	USA	Massachusetts	February 3rd, 2022
OQ960484	Influenza A virus (A/Canada Goose/Massachusetts/22-007630-001/2022(H5N1)) segment 4 hemagglutinin (HA) gene, complete cds	1704 bp	USA	Massachusetts	March 8th, 2022
OQ960492	Influenza A virus (A/Canada Goose/Michigan/22-008506-003/2022(H5N1)) segment 4 hemagglutinin (HA) gene, complete cds	1704 bp	USA	Michigan	March 17th, 2022
OQ960500	Influenza A virus (A/Canada Goose/Michigan/22-008506-004/2022(H5N1)) segment 4 hemagglutinin (HA) gene, complete cds	1704 bp	USA	Michigan	March 17th, 2022
OQ960508	Influenza A virus (A/Canada Goose/Michigan/22-008506-006/2022(H5N1)) segment 4 hemagglutinin (HA) gene, complete cds	1704 bp	USA	Michigan	March 17th, 2022
OQ960516	Influenza A virus (A/Canada Goose/Michigan/22-008506-007/2022(H5N1)) segment 4 hemagglutinin (HA) gene, complete cds	1704 bp	USA	Michigan	March 17th, 2022
OQ960524	Influenza A virus (A/Canada Goose/Michigan/22-008506-008/2022(H5N1)) segment 4 hemagglutinin (HA) gene, complete cds	1704 bp	USA	Michigan	March 17th, 2022
OQ960532	Influenza A virus (A/Canada Goose/Minnesota/22-009383-001/2022(H5N1)) segment 4 hemagglutinin (HA) gene, complete cds	1704 bp	USA	Minnesota	March 25th, 2022
OQ960540	Influenza A virus (A/Canada Goose/Minnesota/22-010232-001/2022(H5N1)) segment 4 hemagglutinin (HA) gene, complete cds	1704 bp	USA	Minnesota	March 25th, 2022
OQ960548	Influenza A virus (A/Canada Goose/Minnesota/22-010355-002/2022(H5N1)) segment 4 hemagglutinin (HA) gene, complete cds	1704 bp	USA	Minnesota	April 5th, 2022
OQ960556	Influenza A virus (A/Canada Goose/Missouri/22-012338-008/2022(H5N1)) segment 4 hemagglutinin (HA) gene, complete cds	1704 bp	USA	Missouri	March 18th, 2022
OQ960564	Influenza A virus (A/Canada Goose/Missouri/22-012338-010/2022(H5N1)) segment 4 hemagglutinin (HA) gene, complete cds	1704 bp	USA	Missouri	March 18th, 2022
OQ960572	Influenza A virus (A/Canada Goose/Missouri/22-012338-014/2022(H5N1)) segment 4 hemagglutinin (HA) gene, complete cds	1704 bp	USA	Missouri	2022-03-01
OQ960580	Influenza A virus (A/Canada Goose/Missouri/22-012338-026/2022(H5N1)) segment 4 hemagglutinin (HA) gene, complete cds	1704 bp	USA	Missouri	2022-04-01
OQ960588	Influenza A virus (A/Canada Goose/Missouri/22-012338-029/2022(H5N1)) segment 4 hemagglutinin (HA) gene, complete cds	1704 bp	USA	Missouri	2022-03-01
OQ960596	Influenza A virus (A/Canada Goose/Montana/22-011285-001/2022(H5N1)) segment 4 hemagglutinin (HA) gene, complete cds	1704 bp	USA	Montana	April 11th, 2022
OQ960604	Influenza A virus (A/Canada Goose/Montana/22-012541-001/2022(H5N1)) segment 4 hemagglutinin (HA) gene, complete cds	1704 bp	USA	Montana	April 20th, 2022
OQ960612	Influenza A virus (A/Canada Goose/Nebraska/22-007169-001/2022(H5N1)) segment 4 hemagglutinin (HA) gene, complete cds	1704 bp	USA	Nebraska	March 7th, 2022
OQ960620	Influenza A virus (A/Canada Goose/Nebraska/22-007179-001/2022(H5N1)) segment 4 hemagglutinin (HA) gene, complete cds	1704 bp	USA	Nebraska	March 7th, 2022
OQ960628	Influenza A virus (A/Canada Goose/New Hampshire/22-006203-001/2022(H5N1)) segment 4 hemagglutinin (HA) gene, complete cds	1704 bp	USA	New Hampshire	February 22nd, 2022
OQ960636	Influenza A virus (A/Canada Goose/New Hampshire/22-006203-002/2022(H5N1)) segment 4 hemagglutinin (HA) gene, complete cds	1704 bp	USA	New Hampshire	February 22nd, 2022
OQ960644	Influenza A virus (A/Canada Goose/New Hampshire/22-006203-003/2022(H5N1)) segment 4 hemagglutinin (HA) gene, complete cds	1704 bp	USA	New Hampshire	February 22nd, 2022
OQ960652	Influenza A virus (A/Canada Goose/New Hampshire/22-010920-002/2022(H5N1)) segment 4 hemagglutinin (HA) gene, complete cds	1704 bp	USA	New Hampshire	April 7th, 2022
OQ960660	Influenza A virus (A/Canada Goose/New York/22-009396-001/2022(H5N1)) segment 4 hemagglutinin (HA) gene, complete cds	1704 bp	USA	New York	March 21st, 2022
OQ960668	Influenza A virus (A/Canada Goose/North Dakota/22-010036-004/2022(H5N1)) segment 4 hemagglutinin (HA) gene, complete cds	1704 bp	USA	North Dakota	March 25th, 2022
OQ960676	Influenza A virus (A/Canada Goose/Ohio/22-007948-001/2022(H5N1)) segment 4 hemagglutinin (HA) gene, complete cds	1704 bp	USA	Ohio	March 1st, 2022
OQ960684	Influenza A virus (A/Canada Goose/Ohio/22-008995-001/2022(H5N1)) segment 4 hemagglutinin (HA) gene, complete cds	1704 bp	USA	Ohio	March 15th, 2022
OQ960692	Influenza A virus (A/Canada Goose/Ohio/22-008995-002/2022(H5N1)) segment 4 hemagglutinin (HA) gene, complete cds	1704 bp	USA	Ohio	March 15th, 2022
OQ960700	Influenza A virus (A/Canada Goose/South Dakota/22-007946-003/2022(H5N1)) segment 4 hemagglutinin (HA) gene, complete cds	1704 bp	USA	South Dakota	March 9th, 2022
OQ960708	Influenza A virus (A/Canada Goose/South Dakota/22-008382-001/2022(H5N1)) segment 4 hemagglutinin (HA) gene, complete cds	1704 bp	USA	South Dakota	March 16th, 2022
OQ960716	Influenza A virus (A/Canada Goose/South Dakota/22-008571-001/2022(H5N1)) segment 4 hemagglutinin (HA) gene, complete cds	1704 bp	USA	South Dakota	March 14th, 2022
OQ960724	Influenza A virus (A/Canada Goose/South Dakota/22-008571-002/2022(H5N1)) segment 4 hemagglutinin (HA) gene, complete cds	1704 bp	USA	South Dakota	March 14th, 2022
OQ960732	Influenza A virus (A/Canada Goose/South Dakota/22-008571-003/2022(H5N1)) segment 4 hemagglutinin (HA) gene, complete cds	1704 bp	USA	South Dakota	March 14th, 2022
OQ960740	Influenza A virus (A/Canada Goose/Tennessee/22-010667-001/2022(H5N1)) segment 4 hemagglutinin (HA) gene, complete cds	1704 bp	USA	Tennessee	April 1st, 2022
OQ960748	Influenza A virus (A/Canada Goose/Vermont/22-012250-001/2022(H5N1)) segment 4 hemagglutinin (HA) gene, complete cds	1704 bp	USA	Vermont	April 18th, 2022
OQ960756	Influenza A virus (A/Canada Goose/Wisconsin/22-009408-001/2022(H5N1)) segment 4 hemagglutinin (HA) gene, complete cds	1704 bp	USA	Wisconsin	March 20th, 2022
OQ960764	Influenza A virus (A/Canada Goose/Wisconsin/22-011238-001/2022(H5N1)) segment 4 hemagglutinin (HA) gene, complete cds	1704 bp	USA	Wisconsin	March 28th, 2022
OQ960772	Influenza A virus (A/Canada Goose/Wisconsin/22-011818-001/2022(H5N1)) segment 4 hemagglutinin (HA) gene, complete cds	1704 bp	USA	Wisconsin	April 2nd, 2022
OQ960780	Influenza A virus (A/Canada Goose/Wisconsin/22-011819-001/2022(H5N1)) segment 4 hemagglutinin (HA) gene, complete cds	1704 bp	USA	Wisconsin	April 4th, 2022
OQ960788	Influenza A virus (A/Canada Goose/Wyoming/22-010373-001/2022(H5N1)) segment 4 hemagglutinin (HA) gene, complete cds	1704 bp	USA	Wyoming	March 31st, 2022
OQ960796	Influenza A virus (A/Canada Goose/Wyoming/22-011125-001/2022(H5N1)) segment 4 hemagglutinin (HA) gene, complete cds	1704 bp	USA	Wyoming	April 10th, 2022
OQ960804	Influenza A virus (A/Canada Goose/Wyoming/22-011671-001/2022(H5N1)) segment 4 hemagglutinin (HA) gene, complete cds	1704 bp	USA	Wyoming	April 13th, 2022
OQ960812	Influenza A virus (A/Canada Goose/Wyoming/22-012062-001/2022(H5N1)) segment 4 hemagglutinin (HA) gene, complete cds	1704 bp	USA	Wyoming	April 18th, 2022
OQ960820	Influenza A virus (A/Canada Goose/Wyoming/22-012665-003/2022(H5N1)) segment 4 hemagglutinin (HA) gene, complete cds	1704 bp	USA	Wyoming	April 21st, 2022

## Sheet: 4. H5N1 - HA - Mis Birds
Accession Number	Species	Strain	Size	Country	State/region	Isolation date
OR818561	Red-tailed hawk	Influenza A virus (A/red-tailed hawk/New York/NYCVH-22-8477/2022(H5N1)) segment 4 hemagglutinin (HA) gene, complete cds	1751 bp	USA	New York	October 22nd, 2022
OR819057	Peregrine falcon	Influenza A virus (A/peregrine falcon/New York/NYCVH-160820/2022(H5N1)) segment 4 hemagglutinin (HA) gene, complete cds	1751 bp	USA	New York	December 18th, 2022
OQ958068	Backyard bird	Influenza A virus (A/Backyard bird/Alaska/22-013107-001/2022(H5N1)) segment 4 hemagglutinin (HA) gene, complete cds	1751 bp	USA	Alaska	April 28th, 2022
OQ958076	Backyard bird	Influenza A virus (A/Backyard bird/Alaska/22-013107-002/2022(H5N1)) segment 4 hemagglutinin (HA) gene, complete cds	1704 bp	USA	Alaska	April 28th, 2022
OQ958084	Backyard bird	Influenza A virus (A/Backyard bird/Colorado/22-010668-001/2022(H5N1)) segment 4 hemagglutinin (HA) gene, complete cds	1704 bp	USA	Colorado	April 7th, 2022
OQ958092	Backyard bird	Influenza A virus (A/Backyard bird/Colorado/22-011827-001/2022(H5N1)) segment 4 hemagglutinin (HA) gene, complete cds	1704 bp	USA	Colorado	April 15th, 2022
OQ958100	Backyard bird	Influenza A virus (A/Backyard bird/Colorado/22-011827-002/2022(H5N1)) segment 4 hemagglutinin (HA) gene, complete cds	1704 bp	USA	Colorado	April 15th, 2022
OQ958108	Backyard bird	Influenza A virus (A/Backyard bird/Connecticut/22-006118-001/2022(H5N1)) segment 4 hemagglutinin (HA) gene, complete cds	1704 bp	USA	Connecticut	February 28th, 2022
OQ958116	Backyard bird	Influenza A virus (A/Backyard bird/Idaho/22-011775-001/2022(H5N1)) segment 4 hemagglutinin (HA) gene, complete cds	1704 bp	USA	Idaho	April 18th, 2022
OQ958124	Backyard bird	Influenza A virus (A/Backyard bird/Idaho/22-011775-002/2022(H5N1)) segment 4 hemagglutinin (HA) gene, complete cds	1704 bp	USA	Idaho	April 18th, 2022
OQ958132	Backyard bird	Influenza A virus (A/Backyard bird/Idaho/22-012045-001/2022(H5N1)) segment 4 hemagglutinin (HA) gene, complete cds	1704 bp	USA	Idaho	April 18th, 2022
OQ958140	Backyard bird	Influenza A virus (A/Backyard bird/Idaho/22-012045-002/2022(H5N1)) segment 4 hemagglutinin (HA) gene, complete cds	1704 bp	USA	Idaho	April 18th, 2022
OQ958148	Backyard bird	Influenza A virus (A/Backyard bird/Illinois/22-009720-001/2022(H5N1)) segment 4 hemagglutinin (HA) gene, complete cds	1704 bp	USA	Illinois	2022-03-29
OQ958156	Backyard bird	Influenza A virus (A/Backyard bird/Illinois/22-009720-003/2022(H5N1)) segment 4 hemagglutinin (HA) gene, complete cds	1704 bp	USA	Illinois	2022-03-29
OQ958164	Backyard bird	Influenza A virus (A/Backyard bird/Iowa/22-006114-001/2022(H5N1)) segment 4 hemagglutinin (HA) gene, complete cds	1704 bp	USA	Iowa	2022-02-28
OQ958172	Backyard bird	Influenza A virus (A/Backyard bird/Iowa/22-008373-001/2022(H5N1)) segment 4 hemagglutinin (HA) gene, complete cds	1704 bp	USA	Iowa	2022-03-19
OQ958196	Backyard bird	Influenza A virus (A/Backyard bird/Kansas/22-008114-001/2022(H5N1)) segment 4 hemagglutinin (HA) gene, complete cds	1704 bp	USA	Kansas	2022-03-16
OQ958204	Backyard bird	Influenza A virus (A/Backyard bird/Kansas/22-008114-002/2022(H5N1)) segment 4 hemagglutinin (HA) gene, complete cds	1704 bp	USA	Kansas	2022-03-16
OQ958244	Backyard bird	Influenza A virus (A/Backyard bird/Maine/22-005158-001/2022(H5N1)) segment 4 hemagglutinin (HA) gene, complete cds	1704 bp	USA	Maine	2022-02-17
OQ958252	Backyard bird	Influenza A virus (A/Backyard bird/Maine/22-005443-001/2022(H5N1)) segment 4 hemagglutinin (HA) gene, complete cds	1704 bp	USA	Maine	2022-02-20
OQ958380	Backyard bird	Influenza A virus (A/Backyard bird/Massachusetts/22-009371-001/2022(H5N1)) segment 4 hemagglutinin (HA) gene, complete cds	1704 bp	USA	Massachusetts	2022-03-25
OQ958388	Backyard bird	Influenza A virus (A/Backyard bird/Michigan/22-005440-001/2022(H5N1)) segment 4 hemagglutinin (HA) gene, complete cds	1704 bp	USA	Michigan	2022-02-22
OQ958396	Backyard bird	Influenza A virus (A/Backyard bird/Michigan/22-005440-002/2022(H5N1)) segment 4 hemagglutinin (HA) gene, complete cds	1704 bp	USA	Michigan	2022-02-22
OQ958532	Backyard bird	Influenza A virus (A/Backyard bird/Minnesota/22-009181-001/2022(H5N1)) segment 4 hemagglutinin (HA) gene, complete cds	1704 bp	USA	Minnesota	2022-03-25
OQ958540	Backyard bird	Influenza A virus (A/Backyard bird/Minnesota/22-009181-003/2022(H5N1)) segment 4 hemagglutinin (HA) gene, complete cds	1704 bp	USA	Minnesota	2022-03-25
OQ958660	Backyard bird	Influenza A virus (A/Backyard bird/Missouri/22-006639-001/2022(H5N1)) segment 4 hemagglutinin (HA) gene, complete cds	1704 bp	USA	Missouri	2022-03-03
OQ958668	Backyard bird	Influenza A virus (A/Backyard bird/Missouri/22-007677-001/2022(H5N1)) segment 4 hemagglutinin (HA) gene, complete cds	1704 bp	USA	Missouri	2022-03-14
OQ958684	Backyard bird	Influenza A virus (A/Backyard bird/Montana/22-010445-001/2022(H5N1)) segment 4 hemagglutinin (HA) gene, complete cds	1704 bp	USA	Montana	2022-04-05
OQ958692	Backyard bird	Influenza A virus (A/Backyard bird/Montana/22-010445-003/2022(H5N1)) segment 4 hemagglutinin (HA) gene, complete cds	1704 bp	USA	Montana	2022-04-05
OQ958700	Backyard bird	Influenza A virus (A/Backyard bird/Nebraska/22-007805-001/2022(H5N1)) segment 4 hemagglutinin (HA) gene, complete cds	1704 bp	USA	Nebraska	2022-03-14
OQ958708	Backyard bird	Influenza A virus (A/Backyard bird/Nebraska/22-007805-002/2022(H5N1)) segment 4 hemagglutinin (HA) gene, complete cds	1704 bp	USA	Nebraska	2022-03-14
OQ958748	Backyard bird	Influenza A virus (A/Backyard bird/New Hampshire/22-007886-001/2022(H5N1)) segment 4 hemagglutinin (HA) gene, complete cds	1704 bp	USA	New Hampshire	2022-03-15
OQ958756	Backyard bird	Influenza A virus (A/Backyard bird/New York/22-005647-001/2022(H5N1)) segment 4 hemagglutinin (HA) gene, complete cds	1704 bp	USA	New York	2022-02-22
OQ958764	Backyard bird	Influenza A virus (A/Backyard bird/New York/22-005647-002/2022(H5N1)) segment 4 hemagglutinin (HA) gene, complete cds	1704 bp	USA	New York	2022-02-22
OQ958828	Backyard bird	Influenza A virus (A/Backyard bird/North Carolina/22-009583-001/2022(H5N1)) segment 4 hemagglutinin (HA) gene, complete cds	1704 bp	USA	North Carolina	2022-03-27
OQ958836	Backyard bird	Influenza A virus (A/Backyard bird/North Dakota/22-010141-001/2022(H5N1)) segment 4 hemagglutinin (HA) gene, complete cds	1704 bp	USA	North Dakota	2022-04-04
OQ958844	Backyard bird	Influenza A virus (A/Backyard bird/North Dakota/22-010657-001/2022(H5N1)) segment 4 hemagglutinin (HA) gene, complete cds	1704 bp	USA	North Dakota	2022-04-06
OQ958892	Backyard bird	Influenza A virus (A/Backyard bird/Ohio/22-009419-001/2022(H5N1)) segment 4 hemagglutinin (HA) gene, complete cds	1704 bp	USA	Ohio	2022-03-26
OQ958900	Backyard bird	Influenza A virus (A/Backyard bird/South Dakota/22-009194-002/2022(H5N1)) segment 4 hemagglutinin (HA) gene, complete cds	1704 bp	USA	South Dakota	2022-03-25
OQ958908	Backyard bird	Influenza A virus (A/Backyard bird/Virginia/22-004415-001/2022(H5N1)) segment 4 hemagglutinin (HA) gene, complete cds	1704 bp	USA	Virgini	2022-02-11
OQ958916	Backyard bird	Influenza A virus (A/Backyard bird/Wisconsin/22-009934-002/2022(H5N1)) segment 4 hemagglutinin (HA) gene, complete cds	1704 bp	USA	Wisconsin	2022-03-31
OQ958924	Backyard bird	Influenza A virus (A/Backyard bird/Wisconsin/22-010325-001/2022(H5N1)) segment 4 hemagglutinin (HA) gene, complete cds	1704 bp	USA	Wisconsin	2022-04-05
OQ789275	American wigeon	Influenza A virus (A/American wigeon/South Carolina/AH0195145/2021(H5N1)) segment 4 hemagglutinin (HA) gene, complete cds	1704 bp	USA	South Carolina	2021-12-30

## Sheet: 5. H5N1 - HA - Turkey
Accession Number	Strain	Size	State/region	Isolation date
OQ957580	Influenza A virus (A/Turkey/Minnesota/22-011787-001/2022(H5N1)) segment 4 hemagglutinin (HA) gene, complete cds	1704	Minnesota	2022-04-15
OQ957588	Influenza A virus (A/Turkey/Minnesota/22-011787-002/2022(H5N1)) segment 4 hemagglutinin (HA) gene, complete cds	1704	Minnesota	2022-04-15
OQ965188	Influenza A virus (A/Turkey Vulture/New York/22-011863-001/2022(H5N1)) segment 4 hemagglutinin (HA) gene, complete cds	1704	New York	2022-04-12
OQ965196	Influenza A virus (A/Turkey Vulture/North Dakota/22-013134-001/2022(H5N1)) segment 4 hemagglutinin (HA) gene, complete cds	1704	North Dakota	2022-04-21
OQ965204	Influenza A virus (A/Turkey Vulture/North Dakota/22-013144-001/2022(H5N1)) segment 4 hemagglutinin (HA) gene, complete cds	1704	North Dakota	2022-04-21
OQ965220	Influenza A virus (A/Turkey Vulture/Vermont/22-011552-001/2022(H5N1)) segment 4 hemagglutinin (HA) gene, complete cds	1704	Vermont	2022-04-12
OQ965228	Influenza A virus (A/Turkey/Indiana/22-003707-003/2022(H5N1)) segment 4 hemagglutinin (HA) gene, complete cds	1704	Indiana	2022-02-07
OQ965236	Influenza A virus (A/Turkey/Indiana/22-004688-002/2022(H5N1)) segment 4 hemagglutinin (HA) gene, complete cds	1704	Indiana	2022-02-14
OQ965324	Influenza A virus (A/Turkey/Iowa/22-006795-001/2022(H5N1)) segment 4 hemagglutinin (HA) gene, complete cds	1704	Iowa	2022-03-06
OQ965332	Influenza A virus (A/Turkey/Iowa/22-008862-002/2022(H5N1)) segment 4 hemagglutinin (HA) gene, complete cds	1704	Iowa	2022-03-23
OQ965428	Influenza A virus (A/Turkey/Kansas/22-011119-001/2022(H5N1)) segment 4 hemagglutinin (HA) gene, complete cds	1704	Kansas	2022-04-09
OQ965436	Influenza A virus (A/Turkey/Kansas/22-011119-002/2022(H5N1)) segment 4 hemagglutinin (HA) gene, complete cds	1704	Kansas	2022-04-09
OQ965452	Influenza A virus (A/Turkey/Kentucky/22-004546-001/2022(H5N1)) segment 4 hemagglutinin (HA) gene, complete cds	1704	Kentucky	2022-02-12
OQ965460	Influenza A virus (A/Turkey/Minnesota/22-009182-001/2022(H5N1)) segment 4 hemagglutinin (HA) gene, complete cds	1704	Minnesota	2022-03-25
OQ965468	Influenza A virus (A/Turkey/Minnesota/22-009182-002/2022(H5N1)) segment 4 hemagglutinin (HA) gene, complete cds	1704	Minnesota	2022-03-25
OQ966140	Influenza A virus (A/Turkey/Missouri/22-006944-002/2022(H5N1)) segment 4 hemagglutinin (HA) gene, complete cds	1704	Missouri	2022-03-07
OQ966148	Influenza A virus (A/Turkey/Missouri/22-007087-001/2022(H5N1)) segment 4 hemagglutinin (HA) gene, complete cds	1704	Missouri	2022-03-08
OQ966180	Influenza A virus (A/Turkey/North Carolina/22-009332-001/2022(H5N1)) segment 4 hemagglutinin (HA) gene, complete cds	1704	North Carolina	2022-03-27
OQ966188	Influenza A virus (A/Turkey/North Carolina/22-009981-001/2022(H5N1)) segment 4 hemagglutinin (HA) gene, complete cds	1704	North Carolina	2022-03-31
OQ966300	Influenza A virus (A/Turkey/North Dakota/22-009840-001/2022(H5N1)) segment 4 hemagglutinin (HA) gene, complete cds	1704	North Dakota	2022-03-30
OQ966308	Influenza A virus (A/Turkey/North Dakota/22-009978-001/2022(H5N1)) segment 4 hemagglutinin (HA) gene, complete cds	1704	North Dakota	2022-04-01
OQ966340	Influenza A virus (A/Turkey/South Dakota/22-006792-001/2022(H5N1)) segment 4 hemagglutinin (HA) gene, complete cds	1704	South Dakota	2022-03-04
OQ966348	Influenza A virus (A/Turkey/South Dakota/22-006792-002/2022(H5N1)) segment 4 hemagglutinin (HA) gene, complete cds	1704	South Dakota	2022-03-04
OQ966732	Influenza A virus (A/Turkey/Utah/22-012960-001/2022(H5N1)) segment 4 hemagglutinin (HA) gene, complete cds	1704	Utah	2022-04-26
OQ966740	Influenza A virus (A/Turkey/Wisconsin/22-010935-001/2022(H5N1)) segment 4 hemagglutinin (HA) gene, complete cds	1704	Wisconsin	2022-04-10
OQ966748	Influenza A virus (A/Turkey/Wisconsin/22-010935-002/2022(H5N1)) segment 4 hemagglutinin (HA) gene, complete cds	1704	Wisconsin	2022-04-10
OQ966868	Influenza A virus (A/Wild Turkey/Montana/22-012657-001/2022(H5N1)) segment 4 hemagglutinin (HA) gene, complete cds	1704	Montana	2022-04-12
OQ966876	Influenza A virus (A/Wild Turkey/Montana/22-012657-002/2022(H5N1)) segment 4 hemagglutinin (HA) gene, complete cds	1704	Montana	2022-04-12
OQ966884	Influenza A virus (A/Wild Turkey/Wyoming/22-011426-001/2022(H5N1)) segment 4 hemagglutinin (HA) gene, complete cds	1704	Wyoming	2022-04-01
OQ966892	Influenza A virus (A/Wild Turkey/Wyoming/22-011426-003/2022(H5N1)) segment 4 hemagglutinin (HA) gene, complete cds	1704	Wyoming	2022-04-01
