# Supplementary material for: Artificial Intelligence-Guided Design of some Pan-H5N1-clade 2.3.4.4b Mosaic DNA-based vaccines to combat the circulating HPAI in birds
Source: Research Square preprint supplement (doi:10.21203/rs.3.rs-6711963/v1), 2025-05-23
Supplement: Supplementary file 3 [file d7501c55032559cc4a634a14.xlsx]

## Sheet: 1. H5N1 - NP - Chicken
Accession number	Strain	Size	State/region	Isolation date
PV370538	Influenza A virus (A/chicken/Larimer-BYC/2.3.4.4b/2022(H5N1)) segment 5 nucleocapsid protein (NP) gene, complete cd	1552 bp	Colorado	2022-01-01
OR819339	Influenza A virus (A/chicken/New York/NYCVH-168127/2023(H5N1)) segment 5 nucleocapsid protein (NP) gene, complete cds	1565 bp	New York	2023-04-09
OQ967117	Influenza A virus (A/chicken/Colorado/22-011826-001/2022(H5N1)) segment 5 nucleocapsid protein (NP) gene, complete cds	1497 bp	Colorado	2022-04-15
OQ967125	Influenza A virus (A/chicken/Colorado/22-011826-002/2022(H5N1)) segment 5 nucleocapsid protein (NP) gene, complete cds	1497 bp	Colorado	2022-04-15
OQ967133	Influenza A virus (A/chicken/Colorado/22-012308-001/2022(H5N1)) segment 5 nucleocapsid protein (NP) gene, complete cds	1497 bp	Colorado	2022-04-19
OQ967141	Influenza A virus (A/chicken/Colorado/22-012308-002/2022(H5N1)) segment 5 nucleocapsid protein (NP) gene, complete cds	1497 bp	Colorado	2022-04-19
OQ967149	Influenza A virus (A/chicken/Colorado/22-012308-003/2022(H5N1)) segment 5 nucleocapsid protein (NP) gene, complete cds	1497 bp	Colorado	2022-04-19
OQ967157	Influenza A virus (A/chicken/Colorado/22-013057-001/2022(H5N1)) segment 5 nucleocapsid protein (NP) gene, complete cds	1497 bp	Colorado	2022-04-28
OQ967165	Influenza A virus (A/chicken/Delaware/22-005260-001/2022(H5N1)) segment 5 nucleocapsid protein (NP) gene, complete cds	1497 bp	Delaware	2022-02-21
OQ967173	Influenza A virus (A/chicken/Delaware/22-006945-001/2022(H5N1)) segment 5 nucleocapsid protein (NP) gene, complete cds	1497 bp	Delaware	2022-03-07
OQ967181	Influenza A virus (A/chicken/Delaware/22-006945-002/2022(H5N1)) segment 5 nucleocapsid protein (NP) gene, complete cds	1497 bp	Delaware	2022-03-07
OQ967189	Influenza A virus (A/chicken/Delaware/22-006945-003/2022(H5N1)) segment 5 nucleocapsid protein (NP) gene, complete cds	1497 bp	Delaware	2022-03-07
OQ967197	Influenza A virus (A/chicken/Delaware/22-006945-004/2022(H5N1)) segment 5 nucleocapsid protein (NP) gene, complete cds	1497 bp	Delaware	2022-03-07
OQ967205	Influenza A virus (A/chicken/Delaware/22-008054-001/2022(H5N1)) segment 5 nucleocapsid protein (NP) gene, complete cds	1497 bp	Delaware	2022-03-16
OQ967213	Influenza A virus (A/chicken/Delaware/22-008054-003/2022(H5N1)) segment 5 nucleocapsid protein (NP) gene, complete cds	1497 bp	Delaware	2022-03-16
OQ967221	Influenza A virus (A/chicken/Delaware/22-008054-004/2022(H5N1)) segment 5 nucleocapsid protein (NP) gene, complete cds	1497 bp	Delaware	2022-03-16
OQ967229	Influenza A virus (A/chicken/Idaho/22-011336-001/2022(H5N1)) segment 5 nucleocapsid protein (NP) gene, complete cds	1497 bp	Idaho	2022-04-13
OQ967237	Influenza A virus (A/chicken/Idaho/22-011347-002/2022(H5N1)) segment 5 nucleocapsid protein (NP) gene, complete cds	1497 bp	Idaho	2022-04-14
OQ967245	Influenza A virus (A/chicken/Idaho/22-011347-004/2022(H5N1)) segment 5 nucleocapsid protein (NP) gene, complete cds	1497 bp	Idaho	2022-04-14
OQ967253	Influenza A virus (A/chicken/Idaho/22-011347-005/2022(H5N1)) segment 5 nucleocapsid protein (NP) gene, complete cds	1497 bp	Idaho	2022-04-14
OQ967261	Influenza A virus (A/chicken/Indiana/22-012933-001/2022(H5N1)) segment 5 nucleocapsid protein (NP) gene, complete cds	1497 bp	Idaho	2022-04-23
OQ967269	Influenza A virus (A/chicken/Iowa/22-007376-001/2022(H5N1)) segment 5 nucleocapsid protein (NP) gene, complete cds	1497 bp	Iowa	2022-03-10
OQ967277	Influenza A virus (A/chicken/Iowa/22-007376-003/2022(H5N1)) segment 5 nucleocapsid protein (NP) gene, complete cds	1497 bp	Iowa	2022-03-10
OQ967285	Influenza A virus (A/chicken/Iowa/22-007376-005/2022(H5N1)) segment 5 nucleocapsid protein (NP) gene, complete cds	1497 bp	Iowa	2022-03-10
OQ967293	Influenza A virus (A/chicken/Iowa/22-007376-007/2022(H5N1)) segment 5 nucleocapsid protein (NP) gene, complete cds	1497 bp	Iowa	2022-03-10
OQ967301	Influenza A virus (A/chicken/Iowa/22-007376-012/2022(H5N1)) segment 5 nucleocapsid protein (NP) gene, complete cds	1497 bp	Iowa	2022-03-10
OQ967309	Influenza A virus (A/chicken/Iowa/22-008176-003/2022(H5N1)) segment 5 nucleocapsid protein (NP) gene, complete cds	1497 bp	Iowa	2022-03-17
OQ967317	Influenza A virus (A/chicken/Iowa/22-008176-004/2022(H5N1)) segment 5 nucleocapsid protein (NP) gene, complete cds	1497 bp	Iowa	2022-03-17
OQ967325	Influenza A virus (A/chicken/Iowa/22-008176-005/2022(H5N1)) segment 5 nucleocapsid protein (NP) gene, complete cds	1497 bp	Iowa	2022-03-17
OQ967333	Influenza A virus (A/chicken/Iowa/22-009180-001/2022(H5N1)) segment 5 nucleocapsid protein (NP) gene, complete cds	1497 bp	Iowa	2022-03-25
OQ967341	Influenza A virus (A/chicken/Iowa/22-009180-002/2022(H5N1)) segment 5 nucleocapsid protein (NP) gene, complete cds	1497 bp	Iowa	2022-03-25
OQ967349	Influenza A virus (A/chicken/Iowa/22-009287-001/2022(H5N1)) segment 5 nucleocapsid protein (NP) gene, complete cds	1497 bp	Iowa	2022-03-28
OQ967357	Influenza A virus (A/chicken/Iowa/22-009819-001/2022(H5N1)) segment 5 nucleocapsid protein (NP) gene, complete cds	1497 bp	Iowa	2022-03-31
OQ967365	Influenza A virus (A/chicken/Iowa/22-009819-002/2022(H5N1)) segment 5 nucleocapsid protein (NP) gene, complete cds	1497 bp	Iowa	2022-03-31
OQ967373	Influenza A virus (A/chicken/Iowa/22-009985-001/2022(H5N1)) segment 5 nucleocapsid protein (NP) gene, complete cds	1497 bp	Iowa	2022-04-01
OQ967381	Influenza A virus (A/chicken/Kentucky/22-004416-001/2022(H5N1)) segment 5 nucleocapsid protein (NP) gene, complete cds	1497 bp	Kentucky	2022-02-11
OQ967389	Influenza A virus (A/chicken/Kentucky/22-004416-002/2022(H5N1)) segment 5 nucleocapsid protein (NP) gene, complete cds	1497 bp	Kentucky	2022-02-11
OQ967397	Influenza A virus (A/chicken/Kentucky/22-004416-003/2022(H5N1)) segment 5 nucleocapsid protein (NP) gene, complete cds	1497 bp	Kentucky	2022-02-11
OQ967405	Influenza A virus (A/chicken/Maryland/22-006578-001/2022(H5N1)) segment 5 nucleocapsid protein (NP) gene, complete cds	1497 bp	Maryland	2022-03-03
OQ967413	Influenza A virus (A/chicken/Maryland/22-006578-002/2022(H5N1)) segment 5 nucleocapsid protein (NP) gene, complete cds	1497 bp	Maryland	2022-03-03
OQ967421	Influenza A virus (A/chicken/Maryland/22-006578-005/2022(H5N1)) segment 5 nucleocapsid protein (NP) gene, complete cds	1497 bp	Maryland	2022-03-03
OQ967429	Influenza A virus (A/chicken/Maryland/22-006578-013/2022(H5N1)) segment 5 nucleocapsid protein (NP) gene, complete cds	1497 bp	Maryland	2022-03-03
OQ967437	Influenza A virus (A/chicken/Maryland/22-006578-014/2022(H5N1)) segment 5 nucleocapsid protein (NP) gene, complete cds	1497 bp	Maryland	2022-03-03
OQ967445	Influenza A virus (A/chicken/Maryland/22-006948-001/2022(H5N1)) segment 5 nucleocapsid protein (NP) gene, complete cds	1497 bp	Maryland	2022-03-04
OQ967453	Influenza A virus (A/chicken/Maryland/22-007086-001/2022(H5N1)) segment 5 nucleocapsid protein (NP) gene, complete cds	1497 bp	Maryland	2022-03-07
OQ967461	Influenza A virus (A/chicken/Maryland/22-007273-001/2022(H5N1)) segment 5 nucleocapsid protein (NP) gene, complete cds	1497 bp	Maryland	2022-03-08
OQ967469	Influenza A virus (A/chicken/Maryland/22-007273-002/2022(H5N1)) segment 5 nucleocapsid protein (NP) gene, complete cds	1497 bp	Maryland	2022-03-08
OQ967477	Influenza A virus (A/chicken/Maryland/22-007273-003/2022(H5N1)) segment 5 nucleocapsid protein (NP) gene, complete cds	1497 bp	Maryland	2022-03-08
OQ967485	Influenza A virus (A/chicken/Maryland/22-007273-004/2022(H5N1)) segment 5 nucleocapsid protein (NP) gene, complete cds	1497 bp	Maryland	2022-03-08
OQ967493	Influenza A virus (A/chicken/Maryland/22-007273-005/2022(H5N1)) segment 5 nucleocapsid protein (NP) gene, complete cds	1497 bp	Maryland	2022-03-08
OQ967501	Influenza A virus (A/chicken/Maryland/22-008243-001/2022(H5N1)) segment 5 nucleocapsid protein (NP) gene, complete cds	1497 bp	Maryland	2022-03-17
OQ967509	Influenza A virus (A/chicken/Michigan/22-011627-001/2022(H5N1)) segment 5 nucleocapsid protein (NP) gene, complete cds	1497 bp	Michigan	2022-04-13
OQ967517	Influenza A virus (A/chicken/Michigan/22-012855-001/2022(H5N1)) segment 5 nucleocapsid protein (NP) gene, complete cds	1497 bp	Michigan	2022-04-25
OQ967525	Influenza A virus (A/chicken/Michigan/22-012855-002/2022(H5N1)) segment 5 nucleocapsid protein (NP) gene, complete cds	1497 bp	Michigan	2022-04-25
OQ967533	Influenza A virus (A/chicken/Michigan/22-012855-003/2022(H5N1)) segment 5 nucleocapsid protein (NP) gene, complete cds	1497 bp	Michigan	2022-04-25
OQ967541	Influenza A virus (A/chicken/Michigan/22-012855-004/2022(H5N1)) segment 5 nucleocapsid protein (NP) gene, complete cds	1497 bp	Michigan	2022-04-25
OQ967549	Influenza A virus (A/chicken/Michigan/22-012855-005/2022(H5N1)) segment 5 nucleocapsid protein (NP) gene, complete cds	1497 bp	Michigan	2022-04-25
OQ967557	Influenza A virus (A/chicken/Michigan/22-012977-001/2022(H5N1)) segment 5 nucleocapsid protein (NP) gene, complete cds	1497 bp	Michigan	2022-04-26
OQ967565	Influenza A virus (A/chicken/Michigan/22-013224-001/2022(H5N1)) segment 5 nucleocapsid protein (NP) gene, complete cds	1497 bp	Michigan	2022-04-29
OQ967573	Influenza A virus (A/chicken/Minnesota/22-010993-001/2022(H5N1)) segment 5 nucleocapsid protein (NP) gene, complete cds	1497 bp	Minnesota	2022-04-10
OQ967581	Influenza A virus (A/chicken/Minnesota/22-010993-004/2022(H5N1)) segment 5 nucleocapsid protein (NP) gene, complete cds	1497 bp	Minnesota	2022-04-10
OQ967589	Influenza A virus (A/chicken/Minnesota/22-010994-001/2022(H5N1)) segment 5 nucleocapsid protein (NP) gene, complete cds	1497 bp	Minnesota	2022-04-10
OQ967597	Influenza A virus (A/chicken/Minnesota/22-012373-001/2022(H5N1)) segment 5 nucleocapsid protein (NP) gene, complete cds	1497 bp	Minnesota	2022-04-21
OQ967605	Influenza A virus (A/chicken/Minnesota/22-012932-001/2022(H5N1)) segment 5 nucleocapsid protein (NP) gene, complete cds	1497 bp	Minnesota	2022-04-26
OQ967613	Influenza A virus (A/chicken/Minnesota/22-012966-001/2022(H5N1)) segment 5 nucleocapsid protein (NP) gene, complete cds	1497 bp	Minnesota	2022-04-26
OQ967621	Influenza A virus (A/chicken/Missouri/22-006569-001/2022(H5N1)) segment 5 nucleocapsid protein (NP) gene, complete cds	1497 bp	Missouri	2022-03-02
OQ967629	Influenza A virus (A/chicken/Missouri/22-006569-004/2022(H5N1)) segment 5 nucleocapsid protein (NP) gene, complete cds	1497 bp	Missouri	2022-03-02
OQ967637	Influenza A virus (A/chicken/Missouri/22-006569-005/2022(H5N1)) segment 5 nucleocapsid protein (NP) gene, complete cds	1497 bp	Missouri	2022-03-02
OQ967645	Influenza A virus (A/chicken/Missouri/22-006569-007/2022(H5N1)) segment 5 nucleocapsid protein (NP) gene, complete cds	1497 bp	Missouri	2022-03-02
OQ967653	Influenza A virus (A/chicken/Montana/22-010923-004/2022(H5N1)) segment 5 nucleocapsid protein (NP) gene, complete cds	1497 bp	Montana	2022-04-09
OQ967661	Influenza A virus (A/chicken/Montana/22-010923-006/2022(H5N1)) segment 5 nucleocapsid protein (NP) gene, complete cds	1497 bp	Montana	2022-04-09
OQ967669	Influenza A virus (A/chicken/Montana/22-012040-001/2022(H5N1)) segment 5 nucleocapsid protein (NP) gene, complete cds	1497 bp	Montana	2022-04-19
OQ967677	Influenza A virus (A/chicken/Montana/22-012040-003/2022(H5N1)) segment 5 nucleocapsid protein (NP) gene, complete cds	1497 bp	Montana	2022-04-19
OQ967685	Influenza A virus (A/chicken/Montana/22-012540-001/2022(H5N1)) segment 5 nucleocapsid protein (NP) gene, complete cds	1497 bp	Montana	2022-04-22
OQ967693	Influenza A virus (A/chicken/Montana/22-013053-001/2022(H5N1)) segment 5 nucleocapsid protein (NP) gene, complete cds	1497 bp	Montana	2022-04-28
OQ967701	Influenza A virus (A/chicken/Montana/22-013053-002/2022(H5N1)) segment 5 nucleocapsid protein (NP) gene, complete cds	1497 bp	Montana	2022-04-28
OQ967709	Influenza A virus (A/chicken/Montana/22-013056-002/2022(H5N1)) segment 5 nucleocapsid protein (NP) gene, complete cds	1497 bp	Montana	2022-04-28
OQ967717	Influenza A virus (A/chicken/Nebraska/22-008467-001/2022(H5N1)) segment 5 nucleocapsid protein (NP) gene, complete cds	1497 bp	Nebraska	2022-03-21
OQ967725	Influenza A virus (A/chicken/Nebraska/22-009006-001/2022(H5N1)) segment 5 nucleocapsid protein (NP) gene, complete cds	1497 bp	Nebraska	2022-03-23
OQ967733	Influenza A virus (A/chicken/Nebraska/22-010905-001/2022(H5N1)) segment 5 nucleocapsid protein (NP) gene, complete cds	1497 bp	Nebraska	2022-04-11
OQ967741	Influenza A virus (A/chicken/Nebraska/22-012756-001/2022(H5N1)) segment 5 nucleocapsid protein (NP) gene, complete cds	1497 bp	Nebraska	2022-04-26
OQ967749	Influenza A virus (A/chicken/North Carolina/22-010298-001/2022(H5N1)) segment 5 nucleocapsid protein (NP) gene, complete cds	1497 bp	North Carolina	2022-04-04
OQ967757	Influenza A virus (A/chicken/North Carolina/22-010298-002/2022(H5N1)) segment 5 nucleocapsid protein (NP) gene, complete cds	1497 bp	North Carolina	2022-04-04
OQ967765	Influenza A virus (A/chicken/North Carolina/22-010299-002/2022(H5N1)) segment 5 nucleocapsid protein (NP) gene, complete cds	1497 bp	North Carolina	2022-04-04
OQ967773	Influenza A virus (A/chicken/North Carolina/22-010929-001/2022(H5N1)) segment 5 nucleocapsid protein (NP) gene, complete cds	1497 bp	North Carolina	2022-04-11
OQ967781	Influenza A virus (A/chicken/North Carolina/22-010929-002/2022(H5N1)) segment 5 nucleocapsid protein (NP) gene, complete cds	1497 bp	North Carolina	2022-04-11
OQ967789	Influenza A virus (A/chicken/North Carolina/22-010929-007/2022(H5N1)) segment 5 nucleocapsid protein (NP) gene, complete cds	1497 bp	North Carolina	2022-04-11
OQ967797	Influenza A virus (A/chicken/North Dakota/22-009337-001/2022(H5N1)) segment 5 nucleocapsid protein (NP) gene, complete cds	1497 bp	North Dakota	2022-03-28
OQ967805	Influenza A virus (A/chicken/North Dakota/22-009677-001/2022(H5N1)) segment 5 nucleocapsid protein (NP) gene, complete cds	1497 bp	North Dakota	2022-03-30
OQ967813	Influenza A virus (A/chicken/North Dakota/22-011109-001/2022(H5N1)) segment 5 nucleocapsid protein (NP) gene, complete cds	1497 bp	North Dakota	2022-04-11
OQ967821	Influenza A virus (A/chicken/North Dakota/22-011286-001/2022(H5N1)) segment 5 nucleocapsid protein (NP) gene, complete cds	1497 bp	North Dakota	2022-04-12
OQ967829	Influenza A virus (A/chicken/North Dakota/22-012538-001/2022(H5N1)) segment 5 nucleocapsid protein (NP) gene, complete cds	1497 bp	North Dakota	2022-04-25
OQ967837	Influenza A virus (A/chicken/North Dakota/22-012538-002/2022(H5N1)) segment 5 nucleocapsid protein (NP) gene, complete cds	1497 bp	North Dakota	2022-04-25
OQ967845	Influenza A virus (A/chicken/Oklahoma/22-013220-001/2022(H5N1)) segment 5 nucleocapsid protein (NP) gene, complete cds	1497 bp	Oklahoma	2022-04-28
OQ967853	Influenza A virus (A/chicken/Pennsylvania/22-011531-001/2022(H5N1)) segment 5 nucleocapsid protein (NP) gene, complete cds	1497 bp	Pennsylvania	2022-04-14
OQ967861	Influenza A virus (A/chicken/Pennsylvania/22-011531-005/2022(H5N1)) segment 5 nucleocapsid protein (NP) gene, complete cds	1497 bp	Pennsylvania	2022-04-14
OQ967869	Influenza A virus (A/chicken/Pennsylvania/22-011531-006/2022(H5N1)) segment 5 nucleocapsid protein (NP) gene, complete cds	1497 bp	Pennsylvania	2022-04-14
OQ967877	Influenza A virus (A/chicken/Pennsylvania/22-011767-001/2022(H5N1)) segment 5 nucleocapsid protein (NP) gene, complete cds	1497 bp	Pennsylvania	2022-04-16
OQ967885	Influenza A virus (A/chicken/Pennsylvania/22-011920-001/2022(H5N1)) segment 5 nucleocapsid protein (NP) gene, complete cds	1497 bp	Pennsylvania	2022-04-18
OQ967893	Influenza A virus (A/chicken/Pennsylvania/22-011921-002/2022(H5N1)) segment 5 nucleocapsid protein (NP) gene, complete cds	1497 bp	Pennsylvania	2022-04-18
OQ967901	Influenza A virus (A/chicken/Pennsylvania/22-012091-001/2022(H5N1)) segment 5 nucleocapsid protein (NP) gene, complete cds	1497 bp	Pennsylvania	2022-04-19
OQ967909	Influenza A virus (A/chicken/Pennsylvania/22-012092-003/2022(H5N1)) segment 5 nucleocapsid protein (NP) gene, complete cds	1497 bp	Pennsylvania	2022-04-19
OQ967917	Influenza A virus (A/chicken/Pennsylvania/22-012092-005/2022(H5N1)) segment 5 nucleocapsid protein (NP) gene, complete cds	1497 bp	Pennsylvania	2022-04-19
OQ967925	Influenza A virus (A/chicken/Pennsylvania/22-012092-007/2022(H5N1)) segment 5 nucleocapsid protein (NP) gene, complete cds	1497 bp	Pennsylvania	2022-04-19
OQ967933	Influenza A virus (A/chicken/Pennsylvania/22-012092-008/2022(H5N1)) segment 5 nucleocapsid protein (NP) gene, complete cds	1497 bp	Pennsylvania	2022-04-19
OQ967941	Influenza A virus (A/chicken/Pennsylvania/22-012248-001/2022(H5N1)) segment 5 nucleocapsid protein (NP) gene, complete cds	1497 bp	Pennsylvania	2022-04-19
OQ967949	Influenza A virus (A/chicken/Pennsylvania/22-012578-004/2022(H5N1)) segment 5 nucleocapsid protein (NP) gene, complete cds	1497 bp	Pennsylvania	2022-04-25
OQ967957	Influenza A virus (A/chicken/Pennsylvania/22-012742-001/2022(H5N1)) segment 5 nucleocapsid protein (NP) gene, complete cds	1497 bp	Pennsylvania	2022-04-26
OQ967965	Influenza A virus (A/chicken/Utah/22-011468-001/2022(H5N1)) segment 5 nucleocapsid protein (NP) gene, complete cds	1497 bp	Utah	2022-04-14
OQ967973	Influenza A virus (A/chicken/Utah/22-011468-002/2022(H5N1)) segment 5 nucleocapsid protein (NP) gene, complete cds	1497 bp	Utah	2022-04-14
OQ967981	Influenza A virus (A/chicken/Utah/22-012375-001/2022(H5N1)) segment 5 nucleocapsid protein (NP) gene, complete cds	1497 bp	Utah	2022-04-14
OQ967989	Influenza A virus (A/chicken/Wisconsin/22-007545-001/2022(H5N1)) segment 5 nucleocapsid protein (NP) gene, complete cds	1497 bp	Wisconsin	2022-03-13
OQ967997	Influenza A virus (A/chicken/Wisconsin/22-007545-004/2022(H5N1)) segment 5 nucleocapsid protein (NP) gene, complete cds	1497 bp	Wisconsin	2022-03-13
OQ968005	Influenza A virus (A/chicken/Wisconsin/22-007545-005/2022(H5N1)) segment 5 nucleocapsid protein (NP) gene, complete cds	1497 bp	Wisconsin	2022-03-13
OQ968013	Influenza A virus (A/chicken/Wisconsin/22-011334-002/2022(H5N1)) segment 5 nucleocapsid protein (NP) gene, complete cds	1497 bp	Wisconsin	2022-04-13

## Sheet: 2. H5N1 - NP - Duck
Accession number	Strain	Size	State/region	Isolation date
OQ957613	Influenza A virus (A/American Black Duck/Connecticut/22-005000-001/2022(H5N1)) segment 5 nucleocapsid protein (NP) gene, complete cds	1497 bp	Connecticut	2022-02-06
OQ957621	Influenza A virus (A/American Black Duck/Connecticut/22-005313-006/2022(H5N1)) segment 5 nucleocapsid protein (NP) gene, complete cds	1497 bp	Connecticut	2022-02-16
OQ957629	Influenza A virus (A/American Black Duck/Connecticut/22-005313-007/2022(H5N1)) segment 5 nucleocapsid protein (NP) gene, complete cds	1497 bp	Connecticut	2022-02-16
OQ957637	Influenza A virus (A/American Black Duck/Connecticut/22-005313-008/2022(H5N1)) segment 5 nucleocapsid protein (NP) gene, complete cds	1497 bp	Connecticut	2022-02-16
OQ957645	Influenza A virus (A/American Black Duck/Ohio/22-009205-005/2022(H5N1)) segment 5 nucleocapsid protein (NP) gene, complete cds	1497 bp	Ohio	2022-03-04
OQ957653	Influenza A virus (A/American Black Duck/Ohio/22-009205-010/2022(H5N1)) segment 5 nucleocapsid protein (NP) gene, complete cds	1497 bp	Ohio	2022-03-04
OQ957661	Influenza A virus (A/American Black Duck/Ohio/22-009209-007/2022(H5N1)) segment 5 nucleocapsid protein (NP) gene, complete cds	1497 bp	Ohio	2022-03-09
OQ960925	Influenza A virus (A/Duck/Florida/22-006447-001/2022(H5N1)) segment 5 nucleocapsid protein (NP) gene, complete cds	1497 bp	Florida	2022-03-03
OQ960933	Influenza A virus (A/Duck/Idaho/22-012046-001/2022(H5N1)) segment 5 nucleocapsid protein (NP) gene, complete cds	1497 bp	Idaho	2022-04-18
OQ960941	Influenza A virus (A/Duck/Idaho/22-012047-001/2022(H5N1)) segment 5 nucleocapsid protein (NP) gene, complete cds	1497 bp	Idaho	2022-04-18
OQ960949	Influenza A virus (A/Duck/Indiana/22-010611-001/2022(H5N1)) segment 5 nucleocapsid protein (NP) gene, complete cds	1497 bp	Indiana	2022-04-07
OQ960957	Influenza A virus (A/Duck/Indiana/22-010624-001/2022(H5N1)) segment 5 nucleocapsid protein (NP) gene, complete cds	1497 bp	Indiana	2022-04-07
OQ960965	Influenza A virus (A/Duck/Indiana/22-011343-001/2022(H5N1)) segment 5 nucleocapsid protein (NP) gene, complete cds	1497 bp	Indiana	2022-04-12
OQ960973	Influenza A virus (A/Duck/Indiana/22-011946-002/2022(H5N1)) segment 5 nucleocapsid protein (NP) gene, complete cds	1497 bp	Indiana	2022-04-17
OQ960981	Influenza A virus (A/Duck/Indiana/22-011946-004/2022(H5N1)) segment 5 nucleocapsid protein (NP) gene, complete cds	1497 bp	Indiana	2022-04-17
OQ960989	Influenza A virus (A/Duck/Montana/22-010454-001/2022(H5N1)) segment 5 nucleocapsid protein (NP) gene, complete cds	1497 bp	Montana	2022-04-06
OQ960997	Influenza A virus (A/Duck/Montana/22-010454-003/2022(H5N1)) segment 5 nucleocapsid protein (NP) gene, complete cds	1497 bp	Montana	2022-04-06
OQ961005	Influenza A virus (A/Duck/Montana/22-012040-005/2022(H5N1)) segment 5 nucleocapsid protein (NP) gene, complete cds	1497 bp	Montana	2022-04-19
OQ961013	Influenza A virus (A/Duck/Montana/22-012040-007/2022(H5N1)) segment 5 nucleocapsid protein (NP) gene, complete cds	1497 bp	Montana	2022-04-19
OQ961021	Influenza A virus (A/Duck/Montana/22-013055-005/2022(H5N1)) segment 5 nucleocapsid protein (NP) gene, complete cds	1497 bp	Montana	2022-04-27
OQ961029	Influenza A virus (A/Duck/Montana/22-013055-006/2022(H5N1)) segment 5 nucleocapsid protein (NP) gene, complete cds	1497 bp	Montana	2022-04-27
OQ961037	Influenza A virus (A/Duck/Montana/22-013055-007/2022(H5N1)) segment 5 nucleocapsid protein (NP) gene, complete cds	1497 bp	Montana	2022-04-27
OQ961045	Influenza A virus (A/Duck/Pennsylvania/22-013189-003/2022(H5N1)) segment 5 nucleocapsid protein (NP) gene, complete cds	1497 bp	Pennsylvania	2022-04-28
OQ961053	Influenza A virus (A/Duck/Pennsylvania/22-013189-004/2022(H5N1)) segment 5 nucleocapsid protein (NP) gene, complete cds	1497 bp	Pennsylvania	2022-04-28
OQ962589	Influenza A virus (A/Muscovy Duck/Florida/22-010679-002/2022(H5N1)) segment 5 nucleocapsid protein (NP) gene, complete cds	1497 bp	Florida	2022-04-04
OQ962597	Influenza A virus (A/Muscovy Duck/Florida/22-010679-003/2022(H5N1)) segment 5 nucleocapsid protein (NP) gene, complete cds	1497 bp	Florida	2022-04-04
OQ962605	Influenza A virus (A/Muscovy Duck/Florida/22-010682-002/2022(H5N1)) segment 5 nucleocapsid protein (NP) gene, complete cds	1497 bp	Florida	2022-04-05
OQ963269	Influenza A virus (A/Ring-necked Duck/Michigan/22-009361-006/2022(H5N1)) segment 5 nucleocapsid protein (NP) gene, complete cds	1497 bp	Michigan	2022-03-23
OQ963277	Influenza A virus (A/Ring-necked Duck/Michigan/22-009361-011/2022(H5N1)) segment 5 nucleocapsid protein (NP) gene, complete cds	1497 bp	Michigan	2022-03-23
OQ963293	Influenza A virus (A/Ring-necked Duck/Missouri/22-012338-025/2022(H5N1)) segment 5 nucleocapsid protein (NP) gene, complete cds	1497 bp	Missouri	2022-03-11
OQ966957	Influenza A virus (A/Wood Duck/Michigan/22-009361-014/2022(H5N1)) segment 5 nucleocapsid protein (NP) gene, complete cds	1497 bp	Michigan	2022-03-23
OQ966965	Influenza A virus (A/Wood Duck/Michigan/22-009361-015/2022(H5N1)) segment 5 nucleocapsid protein (NP) gene, complete cds	1497 bp	Michigan	2022-03-23
OQ966989	Influenza A virus (A/Wood Duck/Minnesota/22-009381-001/2022(H5N1)) segment 5 nucleocapsid protein (NP) gene, complete cds	1497 bp	Minnesota	2022-03-24
OQ966997	Influenza A virus (A/Wood Duck/Minnesota/22-011225-001/2022(H5N1)) segment 5 nucleocapsid protein (NP) gene, complete cds	1497 bp	Minnesota	2022-04-05
OQ967069	Influenza A virus (A/Wood Duck/Missouri/22-012338-023/2022(H5N1)) segment 5 nucleocapsid protein (NP) gene, complete cds	1497 bp	Missouri	2022-04-07
OQ967077	Influenza A virus (A/Wood Duck/New York/22-011188-001/2022(H5N1)) segment 5 nucleocapsid protein (NP) gene, complete cds	1497 bp	New York	2022-04-11
OQ967085	Influenza A virus (A/Wood Duck/North Carolina/22-003829-001/2022(H5N1)) segment 5 nucleocapsid protein (NP) gene, complete cds	1497 bp	North Carolina	2022-01-29
OQ967093	Influenza A virus (A/Wood Duck/Tennessee/22-005907-002/2022(H5N1)) segment 5 nucleocapsid protein (NP) gene, complete cds	1497 bp	Tennessee	2022-02-13
OQ967101	Influenza A virus (A/Wood Duck/Wisconsin/22-011240-001/2022(H5N1)) segment 5 nucleocapsid protein (NP) gene, complete cds	1497 bp	Wisconsin	2022-03-29
OQ967109	Influenza A virus (A/Wood Duck/Wisconsin/22-011820-001/2022(H5N1)) segment 5 nucleocapsid protein (NP) gene, complete cds	1497 bp	Wisconsin	2022-04-05

## Sheet: 3. H5N1 - NP - Canadian Goose
Accession number	Strain	Size	State/region	Isolation date
OQ957565	Influenza A virus (A/Canada Goose/Michigan/22-008506-005/2022(H5N1)) segment 5 nucleocapsid protein (NP) gene, complete cds	1497	Michigan	2022-03-17
OQ960429	Influenza A virus (A/Canada Goose/Colorado/22-010377-001/2022(H5N1)) segment 5 nucleocapsid protein (NP) gene, complete cds	1497	Colorado	2022-04-01
OQ960437	Influenza A virus (A/Canada Goose/Colorado/22-013125-001/2022(H5N1)) segment 5 nucleocapsid protein (NP) gene, complete cds	1497	Colorado	2022-04-26
OQ960445	Influenza A virus (A/Canada Goose/Delaware/22-004745-001/2022(H5N1)) segment 5 nucleocapsid protein (NP) gene, complete cds	1497	Delaware	2022-02-04
OQ960453	Influenza A virus (A/Canada Goose/Florida/22-010682-001/2022(H5N1)) segment 5 nucleocapsid protein (NP) gene, complete cds	1497	Florida	2022-04-05
OQ960461	Influenza A virus (A/Canada Goose/Illinois/22-008379-001/2022(H5N1)) segment 5 nucleocapsid protein (NP) gene, complete cds	1497	Illinois	2022-03-16
OQ960469	Influenza A virus (A/Canada Goose/Massachusetts/22-005893-001/2022(H5N1)) segment 5 nucleocapsid protein (NP) gene, complete cds	1497	Massachusetts	2022-02-03
OQ960477	Influenza A virus (A/Canada Goose/Massachusetts/22-005893-002/2022(H5N1)) segment 5 nucleocapsid protein (NP) gene, complete cds	1497	Massachusetts	2022-02-03
OQ960485	Influenza A virus (A/Canada Goose/Massachusetts/22-007630-001/2022(H5N1)) segment 5 nucleocapsid protein (NP) gene, complete cds	1497	Massachusetts	2022-03-08
OQ960493	Influenza A virus (A/Canada Goose/Michigan/22-008506-003/2022(H5N1)) segment 5 nucleocapsid protein (NP) gene, complete cds	1497	Michigan	2022-03-17
OQ960501	Influenza A virus (A/Canada Goose/Michigan/22-008506-004/2022(H5N1)) segment 5 nucleocapsid protein (NP) gene, complete cds	1497	Michigan	2022-03-17
OQ960509	Influenza A virus (A/Canada Goose/Michigan/22-008506-006/2022(H5N1)) segment 5 nucleocapsid protein (NP) gene, complete cds	1497	Michigan	2022-03-17
OQ960517	Influenza A virus (A/Canada Goose/Michigan/22-008506-007/2022(H5N1)) segment 5 nucleocapsid protein (NP) gene, complete cds	1497	Michigan	2022-03-17
OQ960525	Influenza A virus (A/Canada Goose/Michigan/22-008506-008/2022(H5N1)) segment 5 nucleocapsid protein (NP) gene, complete cds	1497	Michigan	2022-03-17
OQ960533	Influenza A virus (A/Canada Goose/Minnesota/22-009383-001/2022(H5N1)) segment 5 nucleocapsid protein (NP) gene, complete cds	1497	Minnesota	2022-03-25
OQ960541	Influenza A virus (A/Canada Goose/Minnesota/22-010232-001/2022(H5N1)) segment 5 nucleocapsid protein (NP) gene, complete cds	1497	Minnesota	2022-03-25
OQ960549	Influenza A virus (A/Canada Goose/Minnesota/22-010355-002/2022(H5N1)) segment 5 nucleocapsid protein (NP) gene, complete cds	1497	Minnesota	2022-04-05
OQ960557	Influenza A virus (A/Canada Goose/Missouri/22-012338-008/2022(H5N1)) segment 5 nucleocapsid protein (NP) gene, complete cds	1497	Missouri	2022-03-18
OQ960565	Influenza A virus (A/Canada Goose/Missouri/22-012338-010/2022(H5N1)) segment 5 nucleocapsid protein (NP) gene, complete cds	1497	Missouri	2022-03-18
OQ960573	Influenza A virus (A/Canada Goose/Missouri/22-012338-014/2022(H5N1)) segment 5 nucleocapsid protein (NP) gene, complete cds	1497	Missouri	2022-03-01
OQ960581	Influenza A virus (A/Canada Goose/Missouri/22-012338-026/2022(H5N1)) segment 5 nucleocapsid protein (NP) gene, complete cds	1497	Missouri	2022-04-01
OQ960589	Influenza A virus (A/Canada Goose/Missouri/22-012338-029/2022(H5N1)) segment 5 nucleocapsid protein (NP) gene, complete cds	1497	Missouri	2022-03-01
OQ960597	Influenza A virus (A/Canada Goose/Montana/22-011285-001/2022(H5N1)) segment 5 nucleocapsid protein (NP) gene, complete cds	1497	Montana	2022-04-11
OQ960605	Influenza A virus (A/Canada Goose/Montana/22-012541-001/2022(H5N1)) segment 5 nucleocapsid protein (NP) gene, complete cds	1497	Montana	2022-04-20
OQ960613	Influenza A virus (A/Canada Goose/Nebraska/22-007169-001/2022(H5N1)) segment 5 nucleocapsid protein (NP) gene, complete cds	1497	Nebraska	2022-03-07
OQ960621	Influenza A virus (A/Canada Goose/Nebraska/22-007179-001/2022(H5N1)) segment 5 nucleocapsid protein (NP) gene, complete cds	1497	Nebraska	2022-03-07
OQ960629	Influenza A virus (A/Canada Goose/New Hampshire/22-006203-001/2022(H5N1)) segment 5 nucleocapsid protein (NP) gene, complete cds	1497	New Hampshire	2022-02-22
OQ960637	Influenza A virus (A/Canada Goose/New Hampshire/22-006203-002/2022(H5N1)) segment 5 nucleocapsid protein (NP) gene, complete cds	1497	New Hampshire	2022-02-22
OQ960645	Influenza A virus (A/Canada Goose/New Hampshire/22-006203-003/2022(H5N1)) segment 5 nucleocapsid protein (NP) gene, complete cds	1497	New Hampshire	2022-02-22
OQ960653	Influenza A virus (A/Canada Goose/New Hampshire/22-010920-002/2022(H5N1)) segment 5 nucleocapsid protein (NP) gene, complete cds	1497	New Hampshire	2022-04-07
OQ960661	Influenza A virus (A/Canada Goose/New York/22-009396-001/2022(H5N1)) segment 5 nucleocapsid protein (NP) gene, complete cds	1497	New York	2022-03-21
OQ960669	Influenza A virus (A/Canada Goose/North Dakota/22-010036-004/2022(H5N1)) segment 5 nucleocapsid protein (NP) gene, complete cds	1497	North Dakota	2022-03-25
OQ960677	Influenza A virus (A/Canada Goose/Ohio/22-007948-001/2022(H5N1)) segment 5 nucleocapsid protein (NP) gene, complete cds	1497	Ohio	2022-03-01
OQ960685	Influenza A virus (A/Canada Goose/Ohio/22-008995-001/2022(H5N1)) segment 5 nucleocapsid protein (NP) gene, complete cds	1497	Ohio	2022-03-15
OQ960693	Influenza A virus (A/Canada Goose/Ohio/22-008995-002/2022(H5N1)) segment 5 nucleocapsid protein (NP) gene, complete cds	1497	Ohio	2022-03-15
OQ960701	Influenza A virus (A/Canada Goose/South Dakota/22-007946-003/2022(H5N1)) segment 5 nucleocapsid protein (NP) gene, complete cds	1497	South Dakota	2022-03-09
OQ960709	Influenza A virus (A/Canada Goose/South Dakota/22-008382-001/2022(H5N1)) segment 5 nucleocapsid protein (NP) gene, complete cds	1497	South Dakota	2022-03-16
OQ960717	Influenza A virus (A/Canada Goose/South Dakota/22-008571-001/2022(H5N1)) segment 5 nucleocapsid protein (NP) gene, complete cds	1497	South Dakota	2022-03-14
OQ960725	Influenza A virus (A/Canada Goose/South Dakota/22-008571-002/2022(H5N1)) segment 5 nucleocapsid protein (NP) gene, complete cds	1497	South Dakota	2022-03-14
OQ960733	Influenza A virus (A/Canada Goose/South Dakota/22-008571-003/2022(H5N1)) segment 5 nucleocapsid protein (NP) gene, complete cds	1497	South Dakota	2022-03-14
OQ960741	Influenza A virus (A/Canada Goose/Tennessee/22-010667-001/2022(H5N1)) segment 5 nucleocapsid protein (NP) gene, complete cds	1497	Tennessee	2022-04-01
OQ960749	Influenza A virus (A/Canada Goose/Vermont/22-012250-001/2022(H5N1)) segment 5 nucleocapsid protein (NP) gene, complete cds	1497	Vermont	2022-04-18
OQ960757	Influenza A virus (A/Canada Goose/Wisconsin/22-009408-001/2022(H5N1)) segment 5 nucleocapsid protein (NP) gene, complete cds	1497	Wisconsin	2022-03-20
OQ960765	Influenza A virus (A/Canada Goose/Wisconsin/22-011238-001/2022(H5N1)) segment 5 nucleocapsid protein (NP) gene, complete cds	1497	Wisconsin	2022-03-28
OQ960773	Influenza A virus (A/Canada Goose/Wisconsin/22-011818-001/2022(H5N1)) segment 5 nucleocapsid protein (NP) gene, complete cds	1497	Wisconsin	2022-04-02
OQ960781	Influenza A virus (A/Canada Goose/Wisconsin/22-011819-001/2022(H5N1)) segment 5 nucleocapsid protein (NP) gene, complete cds	1497	Wisconsin	2022-04-04
OQ960789	Influenza A virus (A/Canada Goose/Wyoming/22-010373-001/2022(H5N1)) segment 5 nucleocapsid protein (NP) gene, complete cds	1497	Wyoming	2022-03-31
OQ960797	Influenza A virus (A/Canada Goose/Wyoming/22-011125-001/2022(H5N1)) segment 5 nucleocapsid protein (NP) gene, complete cds	1497	Wyoming	2022-04-10
OQ960805	Influenza A virus (A/Canada Goose/Wyoming/22-011671-001/2022(H5N1)) segment 5 nucleocapsid protein (NP) gene, complete cds	1497	Wyoming	2022-04-13
OQ960813	Influenza A virus (A/Canada Goose/Wyoming/22-012062-001/2022(H5N1)) segment 5 nucleocapsid protein (NP) gene, complete cds	1497	Wyoming	2022-04-18
OQ960821	Influenza A virus (A/Canada Goose/Wyoming/22-012665-003/2022(H5N1)) segment 5 nucleocapsid protein (NP) gene, complete cds	1497	Wyoming	2022-04-21

## Sheet: 4. H5N1 - NP - Misc. birds
Accession number	Species	Strain	Size	State/region	Isolation date
OR818566	Red-tailed hawk	Influenza A virus (A/red-tailed hawk/New York/NYCVH-22-8477/2022(H5N1)) segment 5 nucleocapsid protein (NP) gene, complete cds	1565 bp	New York	October 22nd, 2022
OR819059	Peregrine falcon	Influenza A virus (A/peregrine falcon/New York/NYCVH-160820/2022(H5N1)) segment 5 nucleocapsid protein (NP) gene, complete cds	1565 bp	New York	December 18th, 2022
OQ958069	Backyard bird	Influenza A virus (A/Backyard bird/Alaska/22-013107-001/2022(H5N1)) segment 5 nucleocapsid protein (NP) gene, complete cds	1497 bp	Alaska	April 28th, 2022
OQ958077	Backyard bird	Influenza A virus (A/Backyard bird/Alaska/22-013107-002/2022(H5N1)) segment 5 nucleocapsid protein (NP) gene, complete cds	1497 bp	Alaska	April 28th, 2022
OQ958085	Backyard bird	Influenza A virus (A/Backyard bird/Colorado/22-010668-001/2022(H5N1)) segment 5 nucleocapsid protein (NP) gene, complete cds	1497 bp	Colorado	April 7th, 2022
OQ958093	Backyard bird	Influenza A virus (A/Backyard bird/Colorado/22-011827-001/2022(H5N1)) segment 5 nucleocapsid protein (NP) gene, complete cds	1497 bp	Colorado	April 15th, 2022
OQ958101	Backyard bird	Influenza A virus (A/Backyard bird/Colorado/22-011827-002/2022(H5N1)) segment 5 nucleocapsid protein (NP) gene, complete cds	1497 bp	Colorado	April 15th, 2022
OQ958109	Backyard bird	Influenza A virus (A/Backyard bird/Connecticut/22-006118-001/2022(H5N1)) segment 5 nucleocapsid protein (NP) gene, complete cds	1497 bp	Connecticut	February 28th, 2022
OQ958117	Backyard bird	Influenza A virus (A/Backyard bird/Idaho/22-011775-001/2022(H5N1)) segment 5 nucleocapsid protein (NP) gene, complete cds	1497 bp	Idaho	April 18th, 2022
OQ958125	Backyard bird	Influenza A virus (A/Backyard bird/Idaho/22-011775-002/2022(H5N1)) segment 5 nucleocapsid protein (NP) gene, complete cds	1497 bp	Idaho	April 18th, 2022
OQ958133	Backyard bird	Influenza A virus (A/Backyard bird/Idaho/22-012045-001/2022(H5N1)) segment 5 nucleocapsid protein (NP) gene, complete cds	1497 bp	Idaho	April 18th, 2022
OQ958141	Backyard bird	Influenza A virus (A/Backyard bird/Idaho/22-012045-002/2022(H5N1)) segment 5 nucleocapsid protein (NP) gene, complete cds	1497 bp	Idaho	April 18th, 2022
OQ958149	Backyard bird	Influenza A virus (A/Backyard bird/Illinois/22-009720-001/2022(H5N1)) segment 5 nucleocapsid protein (NP) gene, complete cds	1497 bp	Illinois	2022-03-29
OQ958157	Backyard bird	Influenza A virus (A/Backyard bird/Illinois/22-009720-003/2022(H5N1)) segment 5 nucleocapsid protein (NP) gene, complete cds	1497 bp	Illinois	2022-03-29
OQ958165	Backyard bird	Influenza A virus (A/Backyard bird/Iowa/22-006114-001/2022(H5N1)) segment 5 nucleocapsid protein (NP) gene, complete cds	1497 bp	Iowa	2022-02-28
OQ958173	Backyard bird	Influenza A virus (A/Backyard bird/Iowa/22-008373-001/2022(H5N1)) segment 5 nucleocapsid protein (NP) gene, complete cds	1497 bp	Iowa	2022-03-19
OQ958197	Backyard bird	Influenza A virus (A/Backyard bird/Kansas/22-008114-001/2022(H5N1)) segment 5 nucleocapsid protein (NP) gene, complete cds	1497 bp	Kansas	2022-03-16
OQ958205	Backyard bird	Influenza A virus (A/Backyard bird/Kansas/22-008114-002/2022(H5N1)) segment 5 nucleocapsid protein (NP) gene, complete cds	1497 bp	Kansas	2022-03-16
OQ958245	Backyard bird	Influenza A virus (A/Backyard bird/Maine/22-005158-001/2022(H5N1)) segment 5 nucleocapsid protein (NP) gene, complete cds	1497 bp	Maine	2022-02-17
OQ958253	Backyard bird	Influenza A virus (A/Backyard bird/Maine/22-005443-001/2022(H5N1)) segment 5 nucleocapsid protein (NP) gene, complete cds	1497 bp	Maine	2022-02-20
OQ958381	Backyard bird	Influenza A virus (A/Backyard bird/Massachusetts/22-009371-001/2022(H5N1)) segment 5 nucleocapsid protein (NP) gene, complete cds	1497 bp	Massachusetts	2022-03-25
OQ958389	Backyard bird	Influenza A virus (A/Backyard bird/Michigan/22-005440-001/2022(H5N1)) segment 5 nucleocapsid protein (NP) gene, complete cds	1497 bp	Michigan	2022-02-22
OQ958397	Backyard bird	Influenza A virus (A/Backyard bird/Michigan/22-005440-002/2022(H5N1)) segment 5 nucleocapsid protein (NP) gene, complete cds	1497 bp	Michigan	2022-02-22
OQ958533	Backyard bird	Influenza A virus (A/Backyard bird/Minnesota/22-009181-001/2022(H5N1)) segment 5 nucleocapsid protein (NP) gene, complete cds	1497 bp	Minnesota	2022-03-25
OQ958541	Backyard bird	Influenza A virus (A/Backyard bird/Minnesota/22-009181-003/2022(H5N1)) segment 5 nucleocapsid protein (NP) gene, complete cds	1497 bp	Minnesota	2022-03-25
OQ958661	Backyard bird	Influenza A virus (A/Backyard bird/Missouri/22-006639-001/2022(H5N1)) segment 5 nucleocapsid protein (NP) gene, complete cds	1497 bp	Missouri	2022-03-03
OQ958669	Backyard bird	Influenza A virus (A/Backyard bird/Missouri/22-007677-001/2022(H5N1)) segment 5 nucleocapsid protein (NP) gene, complete cds	1497 bp	Missouri	2022-03-14
OQ958685	Backyard bird	Influenza A virus (A/Backyard bird/Montana/22-010445-001/2022(H5N1)) segment 5 nucleocapsid protein (NP) gene, complete cds	1497 bp	Montana	2022-04-05
OQ958693	Backyard bird	Influenza A virus (A/Backyard bird/Montana/22-010445-003/2022(H5N1)) segment 5 nucleocapsid protein (NP) gene, complete cds	1497 bp	Montana	2022-04-05
OQ958701	Backyard bird	Influenza A virus (A/Backyard bird/Nebraska/22-007805-001/2022(H5N1)) segment 5 nucleocapsid protein (NP) gene, complete cds	1497 bp	Nebraska	2022-03-14
OQ958709	Backyard bird	Influenza A virus (A/Backyard bird/Nebraska/22-007805-002/2022(H5N1)) segment 5 nucleocapsid protein (NP) gene, complete cds	1497 bp	Nebraska	2022-03-14
OQ958749	Backyard bird	Influenza A virus (A/Backyard bird/New Hampshire/22-007886-001/2022(H5N1)) segment 5 nucleocapsid protein (NP) gene, complete cds	1497 bp	New Hampshire	2022-03-15
OQ958757	Backyard bird	Influenza A virus (A/Backyard bird/New York/22-005647-001/2022(H5N1)) segment 5 nucleocapsid protein (NP) gene, complete cds	1497 bp	New York	2022-02-22
OQ958765	Backyard bird	Influenza A virus (A/Backyard bird/New York/22-005647-002/2022(H5N1)) segment 5 nucleocapsid protein (NP) gene, complete cds	1497 bp	New York	2022-02-22
OQ958829	Backyard bird	Influenza A virus (A/Backyard bird/North Carolina/22-009583-001/2022(H5N1)) segment 5 nucleocapsid protein (NP) gene, complete cds	1497 bp	North Carolina	2022-03-27
OQ958837	Backyard bird	Influenza A virus (A/Backyard bird/North Dakota/22-010141-001/2022(H5N1)) segment 5 nucleocapsid protein (NP) gene, complete cds	1497 bp	North Dakota	2022-04-04
OQ958845	Backyard bird	Influenza A virus (A/Backyard bird/North Dakota/22-010657-001/2022(H5N1)) segment 5 nucleocapsid protein (NP) gene, complete cds	1497 bp	North Dakota	2022-04-06
OQ958893	Backyard bird	Influenza A virus (A/Backyard bird/Ohio/22-009419-001/2022(H5N1)) segment 5 nucleocapsid protein (NP) gene, complete cds	1497 bp	Ohio	2022-03-26
OQ958901	Backyard bird	Influenza A virus (A/Backyard bird/South Dakota/22-009194-002/2022(H5N1)) segment 5 nucleocapsid protein (NP) gene, complete cds	1497 bp	South Dakota	2022-03-25
OQ958909	Backyard bird	Influenza A virus (A/Backyard bird/Virginia/22-004415-001/2022(H5N1)) segment 5 nucleocapsid protein (NP) gene, complete cds	1497 bp	Virgini	2022-02-11
OQ958917	Backyard bird	Influenza A virus (A/Backyard bird/Wisconsin/22-009934-002/2022(H5N1)) segment 5 nucleocapsid protein (NP) gene, complete cds	1497 bp	Wisconsin	2022-03-31
OQ958925	Backyard bird	Influenza A virus (A/Backyard bird/Wisconsin/22-010325-001/2022(H5N1)) segment 5 nucleocapsid protein (NP) gene, complete cds	1497 bp	Wisconsin	2022-04-05
OQ789276	American wigeon	Influenza A virus (A/American wigeon/South Carolina/AH0195145/2021(H5N1)) segment 5 nucleocapsid protein (NP) gene, complete cds	1497 bp	South Carolina	2021-12-30

## Sheet: 5. H5N1 - NP - Turkey
Accession number	Strain	Size	State/region	Isolation date
OQ957581	Influenza A virus (A/Turkey/Minnesota/22-011787-001/2022(H5N1)) segment 5 nucleocapsid protein (NP) gene, complete cds	1497 bp	Minnesota	2022-04-15
OQ957589	Influenza A virus (A/Turkey/Minnesota/22-011787-002/2022(H5N1)) segment 5 nucleocapsid protein (NP) gene, complete cds	1497 bp	Minnesota	2022-04-15
OQ965189	Influenza A virus (A/Turkey Vulture/New York/22-011863-001/2022(H5N1)) segment 5 nucleocapsid protein (NP) gene, complete cds	1497 bp	New York	2022-04-12
OQ965197	Influenza A virus (A/Turkey Vulture/North Dakota/22-013134-001/2022(H5N1)) segment 5 nucleocapsid protein (NP) gene, complete cds	1497 bp	North Dakota	2022-04-21
OQ965205	Influenza A virus (A/Turkey Vulture/North Dakota/22-013144-001/2022(H5N1)) segment 5 nucleocapsid protein (NP) gene, complete cds	1497 bp	North Dakota	2022-04-21
OQ965221	Influenza A virus (A/Turkey Vulture/Vermont/22-011552-001/2022(H5N1)) segment 5 nucleocapsid protein (NP) gene, complete cds	1497 bp	Vermont	2022-04-12
OQ965229	Influenza A virus (A/Turkey/Indiana/22-003707-003/2022(H5N1)) segment 5 nucleocapsid protein (NP) gene, complete cds	1497 bp	Indiana	2022-02-07
OQ965237	Influenza A virus (A/Turkey/Indiana/22-004688-002/2022(H5N1)) segment 5 nucleocapsid protein (NP) gene, complete cds	1497 bp	Indiana	2022-02-14
OQ965325	Influenza A virus (A/Turkey/Iowa/22-006795-001/2022(H5N1)) segment 5 nucleocapsid protein (NP) gene, complete cds	1497 bp	Iowa	2022-03-06
OQ965333	Influenza A virus (A/Turkey/Iowa/22-008862-002/2022(H5N1)) segment 5 nucleocapsid protein (NP) gene, complete cds	1497 bp	Iowa	2022-03-23
OQ965429	Influenza A virus (A/Turkey/Kansas/22-011119-001/2022(H5N1)) segment 5 nucleocapsid protein (NP) gene, complete cds	1497 bp	Kansas	2022-04-09
OQ965437	Influenza A virus (A/Turkey/Kansas/22-011119-002/2022(H5N1)) segment 5 nucleocapsid protein (NP) gene, complete cds	1497 bp	Kansas	2022-04-09
OQ965453	Influenza A virus (A/Turkey/Kentucky/22-004546-001/2022(H5N1)) segment 5 nucleocapsid protein (NP) gene, complete cds	1497 bp	Kentucky	2022-02-12
OQ965461	Influenza A virus (A/Turkey/Minnesota/22-009182-001/2022(H5N1)) segment 5 nucleocapsid protein (NP) gene, complete cds	1497 bp	Minnesota	2022-03-25
OQ965469	Influenza A virus (A/Turkey/Minnesota/22-009182-002/2022(H5N1)) segment 5 nucleocapsid protein (NP) gene, complete cds	1497 bp	Minnesota	2022-03-25
OQ966141	Influenza A virus (A/Turkey/Missouri/22-006944-002/2022(H5N1)) segment 5 nucleocapsid protein (NP) gene, complete cds	1497 bp	Missouri	2022-03-07
OQ966149	Influenza A virus (A/Turkey/Missouri/22-007087-001/2022(H5N1)) segment 5 nucleocapsid protein (NP) gene, complete cds	1497 bp	Missouri	2022-03-08
OQ966181	Influenza A virus (A/Turkey/North Carolina/22-009332-001/2022(H5N1)) segment 5 nucleocapsid protein (NP) gene, complete cds	1497 bp	North Carolina	2022-03-27
OQ966189	Influenza A virus (A/Turkey/North Carolina/22-009981-001/2022(H5N1)) segment 5 nucleocapsid protein (NP) gene, complete cds	1497 bp	North Carolina	2022-03-31
OQ966301	Influenza A virus (A/Turkey/North Dakota/22-009840-001/2022(H5N1)) segment 5 nucleocapsid protein (NP) gene, complete cds	1497 bp	North Dakota	2022-03-30
OQ966309	Influenza A virus (A/Turkey/North Dakota/22-009978-001/2022(H5N1)) segment 5 nucleocapsid protein (NP) gene, complete cds	1497 bp	North Dakota	2022-04-01
OQ966341	Influenza A virus (A/Turkey/South Dakota/22-006792-001/2022(H5N1)) segment 5 nucleocapsid protein (NP) gene, complete cds	1497 bp	South Dakota	2022-03-04
OQ966349	Influenza A virus (A/Turkey/South Dakota/22-006792-002/2022(H5N1)) segment 5 nucleocapsid protein (NP) gene, complete cds	1497 bp	South Dakota	2022-03-04
OQ966733	Influenza A virus (A/Turkey/Utah/22-012960-001/2022(H5N1)) segment 5 nucleocapsid protein (NP) gene, complete cds	1497 bp	Utah	2022-04-26
OQ966741	Influenza A virus (A/Turkey/Wisconsin/22-010935-001/2022(H5N1)) segment 5 nucleocapsid protein (NP) gene, complete cds	1497 bp	Wisconsin	2022-04-10
OQ966749	Influenza A virus (A/Turkey/Wisconsin/22-010935-002/2022(H5N1)) segment 5 nucleocapsid protein (NP) gene, complete cds	1497 bp	Wisconsin	2022-04-10
OQ966869	Influenza A virus (A/Wild Turkey/Montana/22-012657-001/2022(H5N1)) segment 5 nucleocapsid protein (NP) gene, complete cds	1497 bp	Montana	2022-04-12
OQ966877	Influenza A virus (A/Wild Turkey/Montana/22-012657-002/2022(H5N1)) segment 5 nucleocapsid protein (NP) gene, complete cds	1497 bp	Montana	2022-04-12
OQ966885	Influenza A virus (A/Wild Turkey/Wyoming/22-011426-001/2022(H5N1)) segment 5 nucleocapsid protein (NP) gene, complete cds	1497 bp	Wyoming	2022-04-01
OQ966893	Influenza A virus (A/Wild Turkey/Wyoming/22-011426-003/2022(H5N1)) segment 5 nucleocapsid protein (NP) gene, complete cds	1497 bp	Wyoming	2022-04-01
