# Supplementary material for: Artificial Intelligence-Guided Design of some Pan-H5N1-clade 2.3.4.4b Mosaic DNA-based vaccines to combat the circulating HPAI in birds
Source: Research Square preprint supplement (doi:10.21203/rs.3.rs-6711963/v1), 2025-05-23
Supplement: Supplementary file 4 [file e47c9bd6fc00c9c912d33af8.xlsx]

## Sheet: Chicken
Accession Number	Strain	Size	State/region	Isolation date
PV370535	Influenza A virus (A/chicken/Larimer-BYC/2.3.4.4b/2022(H5N1)) segment 7 matrix protein 2 (M2) and matrix protein 1 (M1) genes, complete cds	1027	Larimer-BYC	2022-01-01
OR819343	Influenza A virus (A/chicken/New York/NYCVH-168127/2023(H5N1)) segment 7 matrix protein 2 (M2) and matrix protein 1 (M1) genes, complete cds	1027	New York	2023-04-09
OQ967119	Influenza A virus (A/chicken/Colorado/22-011826-001/2022(H5N1)) segment 7 matrix protein 2 (M2) and matrix protein 1 (M1) genes, complete cds	982	Colorado	2022-04-15
OQ967127	Influenza A virus (A/chicken/Colorado/22-011826-002/2022(H5N1)) segment 7 matrix protein 2 (M2) and matrix protein 1 (M1) genes, complete cds	982	Colorado	2022-04-15
OQ967135	Influenza A virus (A/chicken/Colorado/22-012308-001/2022(H5N1)) segment 7 matrix protein 2 (M2) and matrix protein 1 (M1) genes, complete cds	982	Colorado	2022-04-19
OQ967143	Influenza A virus (A/chicken/Colorado/22-012308-002/2022(H5N1)) segment 7 matrix protein 2 (M2) and matrix protein 1 (M1) genes, complete cds	982	Colorado	2022-04-19
OQ967151	Influenza A virus (A/chicken/Colorado/22-012308-003/2022(H5N1)) segment 7 matrix protein 2 (M2) and matrix protein 1 (M1) genes, complete cds	982	Colorado	2022-04-19
OQ967159	Influenza A virus (A/chicken/Colorado/22-013057-001/2022(H5N1)) segment 7 matrix protein 2 (M2) and matrix protein 1 (M1) genes, complete cds	982	Colorado	2022-04-28
Q967167	Influenza A virus (A/chicken/Delaware/22-005260-001/2022(H5N1)) segment 7 matrix protein 2 (M2) and matrix protein 1 (M1) genes, complete cds	982	Delaware	2022-02-21
OQ967175	Influenza A virus (A/chicken/Delaware/22-006945-001/2022(H5N1)) segment 7 matrix protein 2 (M2) and matrix protein 1 (M1) genes, complete cds	982	Delaware	2022-03-07
OQ967183	Influenza A virus (A/chicken/Delaware/22-006945-002/2022(H5N1)) segment 7 matrix protein 2 (M2) and matrix protein 1 (M1) genes, complete cds	982	Delaware	2022-03-07
OQ967191	Influenza A virus (A/chicken/Delaware/22-006945-003/2022(H5N1)) segment 7 matrix protein 2 (M2) and matrix protein 1 (M1) genes, complete cds	982	Delaware	2022-03-07
OQ967199	Influenza A virus (A/chicken/Delaware/22-006945-004/2022(H5N1)) segment 7 matrix protein 2 (M2) and matrix protein 1 (M1) genes, complete cds	982	Delaware	2022-03-07
OQ967207	Influenza A virus (A/chicken/Delaware/22-008054-001/2022(H5N1)) segment 7 matrix protein 2 (M2) and matrix protein 1 (M1) genes, complete cds	982	Delaware	2022-03-16
OQ967215	Influenza A virus (A/chicken/Delaware/22-008054-003/2022(H5N1)) segment 7 matrix protein 2 (M2) and matrix protein 1 (M1) genes, complete cds	982	Delaware	2022-03-16
OQ967223	Influenza A virus (A/chicken/Delaware/22-008054-004/2022(H5N1)) segment 7 matrix protein 2 (M2) and matrix protein 1 (M1) genes, complete cds	982	Delaware	2022-03-16
OQ967231	Influenza A virus (A/chicken/Idaho/22-011336-001/2022(H5N1)) segment 7 matrix protein 2 (M2) and matrix protein 1 (M1) genes, complete cds	982	Idaho	2022-04-13
OQ967239	Influenza A virus (A/chicken/Idaho/22-011347-002/2022(H5N1)) segment 7 matrix protein 2 (M2) and matrix protein 1 (M1) genes, complete cds	982	Idaho	2022-04-14
OQ967247	Influenza A virus (A/chicken/Idaho/22-011347-004/2022(H5N1)) segment 7 matrix protein 2 (M2) and matrix protein 1 (M1) genes, complete cds	982	Idaho	2022-04-14
OQ967255	Influenza A virus (A/chicken/Idaho/22-011347-005/2022(H5N1)) segment 7 matrix protein 2 (M2) and matrix protein 1 (M1) genes, complete cds	982	Idaho	2022-04-14
OQ967263	Influenza A virus (A/chicken/Indiana/22-012933-001/2022(H5N1)) segment 7 matrix protein 2 (M2) and matrix protein 1 (M1) genes, complete cds	982	Indiana	2022-04-23
OQ967271	Influenza A virus (A/chicken/Iowa/22-007376-001/2022(H5N1)) segment 7 matrix protein 2 (M2) and matrix protein 1 (M1) genes, complete cds	982	Iowa	2022-03-10
OQ967279	Influenza A virus (A/chicken/Iowa/22-007376-003/2022(H5N1)) segment 7 matrix protein 2 (M2) and matrix protein 1 (M1) genes, complete cds	982	Iowa	2022-03-10
OQ967287	Influenza A virus (A/chicken/Iowa/22-007376-005/2022(H5N1)) segment 7 matrix protein 2 (M2) and matrix protein 1 (M1) genes, complete cds	982	Iowa	2022-03-10
OQ967295	Influenza A virus (A/chicken/Iowa/22-007376-007/2022(H5N1)) segment 7 matrix protein 2 (M2) and matrix protein 1 (M1) genes, complete cds	982	Iowa	2022-03-10
OQ967303	Influenza A virus (A/chicken/Iowa/22-007376-012/2022(H5N1)) segment 7 matrix protein 2 (M2) and matrix protein 1 (M1) genes, complete cds	982	Iowa	2022-03-10
OQ967311	Influenza A virus (A/chicken/Iowa/22-008176-003/2022(H5N1)) segment 7 matrix protein 2 (M2) and matrix protein 1 (M1) genes, complete cds	982	Iowa	2022-03-17
OQ967319	Influenza A virus (A/chicken/Iowa/22-008176-004/2022(H5N1)) segment 7 matrix protein 2 (M2) and matrix protein 1 (M1) genes, complete cds	982	Iowa	2022-03-17
OQ967327	Influenza A virus (A/chicken/Iowa/22-008176-005/2022(H5N1)) segment 7 matrix protein 2 (M2) and matrix protein 1 (M1) genes, complete cds	982	Iowa	2022-03-17
OQ967335	Influenza A virus (A/chicken/Iowa/22-009180-001/2022(H5N1)) segment 7 matrix protein 2 (M2) and matrix protein 1 (M1) genes, complete cds	982	Iowa	2022-03-25
OQ967343	Influenza A virus (A/chicken/Iowa/22-009180-002/2022(H5N1)) segment 7 matrix protein 2 (M2) and matrix protein 1 (M1) genes, complete cds	982	Iowa	2022-03-25
OQ967351	Influenza A virus (A/chicken/Iowa/22-009287-001/2022(H5N1)) segment 7 matrix protein 2 (M2) and matrix protein 1 (M1) genes, complete cds	982	Iowa	2022-03-28
OQ967359	Influenza A virus (A/chicken/Iowa/22-009819-001/2022(H5N1)) segment 7 matrix protein 2 (M2) and matrix protein 1 (M1) genes, complete cds	982	Iowa	2022-03-31
OQ967367	Influenza A virus (A/chicken/Iowa/22-009819-002/2022(H5N1)) segment 7 matrix protein 2 (M2) and matrix protein 1 (M1) genes, complete cds	982	Iowa	2022-03-31
OQ967375	Influenza A virus (A/chicken/Iowa/22-009985-001/2022(H5N1)) segment 7 matrix protein 2 (M2) and matrix protein 1 (M1) genes, complete cds	982	Iowa	2022-04-01
OQ967383	Influenza A virus (A/chicken/Kentucky/22-004416-001/2022(H5N1)) segment 7 matrix protein 2 (M2) and matrix protein 1 (M1) genes, complete cds	982	Kentucky	2022-02-11
OQ967391	Influenza A virus (A/chicken/Kentucky/22-004416-002/2022(H5N1)) segment 7 matrix protein 2 (M2) and matrix protein 1 (M1) genes, complete cds	982	Kentucky	2022-02-11
OQ967399	Influenza A virus (A/chicken/Kentucky/22-004416-003/2022(H5N1)) segment 7 matrix protein 2 (M2) and matrix protein 1 (M1) genes, complete cds	982	Kentucky	2022-02-11
OQ967407	Influenza A virus (A/chicken/Maryland/22-006578-001/2022(H5N1)) segment 7 matrix protein 2 (M2) and matrix protein 1 (M1) genes, complete cds	982	Maryland	2022-03-03
OQ967415	Influenza A virus (A/chicken/Maryland/22-006578-002/2022(H5N1)) segment 7 matrix protein 2 (M2) and matrix protein 1 (M1) genes, complete cds	982	Maryland	2022-03-03
OQ967423	Influenza A virus (A/chicken/Maryland/22-006578-005/2022(H5N1)) segment 7 matrix protein 2 (M2) and matrix protein 1 (M1) genes, complete cds	982	Maryland	2022-03-03
OQ967431	Influenza A virus (A/chicken/Maryland/22-006578-013/2022(H5N1)) segment 7 matrix protein 2 (M2) and matrix protein 1 (M1) genes, complete cds	982	Maryland	2022-03-03
OQ967439	Influenza A virus (A/chicken/Maryland/22-006578-014/2022(H5N1)) segment 7 matrix protein 2 (M2) and matrix protein 1 (M1) genes, complete cds	982	Maryland	2022-03-03
OQ967447	Influenza A virus (A/chicken/Maryland/22-006948-001/2022(H5N1)) segment 7 matrix protein 2 (M2) and matrix protein 1 (M1) genes, complete cds	982	Maryland	2022-03-04
OQ967455	Influenza A virus (A/chicken/Maryland/22-007086-001/2022(H5N1)) segment 7 matrix protein 2 (M2) and matrix protein 1 (M1) genes, complete cds	982	Maryland	2022-03-07
OQ967463	Influenza A virus (A/chicken/Maryland/22-007273-001/2022(H5N1)) segment 7 matrix protein 2 (M2) and matrix protein 1 (M1) genes, complete cds	982	Maryland	2022-03-08
OQ967471	Influenza A virus (A/chicken/Maryland/22-007273-002/2022(H5N1)) segment 7 matrix protein 2 (M2) and matrix protein 1 (M1) genes, complete cds	982	Maryland	2022-03-08
OQ967479	Influenza A virus (A/chicken/Maryland/22-007273-003/2022(H5N1)) segment 7 matrix protein 2 (M2) and matrix protein 1 (M1) genes, complete cds	982	Maryland	2022-03-08
OQ967487	Influenza A virus (A/chicken/Maryland/22-007273-004/2022(H5N1)) segment 7 matrix protein 2 (M2) and matrix protein 1 (M1) genes, complete cds	982	Maryland	2022-03-08
OQ967495	Influenza A virus (A/chicken/Maryland/22-007273-005/2022(H5N1)) segment 7 matrix protein 2 (M2) and matrix protein 1 (M1) genes, complete cds	982	Maryland	2022-03-08
OQ967503	Influenza A virus (A/chicken/Maryland/22-008243-001/2022(H5N1)) segment 7 matrix protein 2 (M2) and matrix protein 1 (M1) genes, complete cds	982	Maryland	2022-03-17
OQ967511	Influenza A virus (A/chicken/Michigan/22-011627-001/2022(H5N1)) segment 7 matrix protein 2 (M2) and matrix protein 1 (M1) genes, complete cds	982	Michigan	2022-04-13
OQ967519	Influenza A virus (A/chicken/Michigan/22-012855-001/2022(H5N1)) segment 7 matrix protein 2 (M2) and matrix protein 1 (M1) genes, complete cds	982	Michigan	2022-04-25
OQ967527	Influenza A virus (A/chicken/Michigan/22-012855-002/2022(H5N1)) segment 7 matrix protein 2 (M2) and matrix protein 1 (M1) genes, complete cds	982	Michigan	2022-04-25
OQ967535	Influenza A virus (A/chicken/Michigan/22-012855-003/2022(H5N1)) segment 7 matrix protein 2 (M2) and matrix protein 1 (M1) genes, complete cds	982	Michigan	2022-04-25
OQ967543	Influenza A virus (A/chicken/Michigan/22-012855-004/2022(H5N1)) segment 7 matrix protein 2 (M2) and matrix protein 1 (M1) genes, complete cds	982	Michigan	2022-04-25
OQ967551	Influenza A virus (A/chicken/Michigan/22-012855-005/2022(H5N1)) segment 7 matrix protein 2 (M2) and matrix protein 1 (M1) genes, complete cds	982	Michigan	2022-04-25
OQ967559	Influenza A virus (A/chicken/Michigan/22-012977-001/2022(H5N1)) segment 7 matrix protein 2 (M2) and matrix protein 1 (M1) genes, complete cds	982	Michigan	2022-04-26
OQ967567	Influenza A virus (A/chicken/Michigan/22-013224-001/2022(H5N1)) segment 7 matrix protein 2 (M2) and matrix protein 1 (M1) genes, complete cds	982	Michigan	2022-04-29
OQ967575	Influenza A virus (A/chicken/Minnesota/22-010993-001/2022(H5N1)) segment 7 matrix protein 2 (M2) and matrix protein 1 (M1) genes, complete cds	982	Minnesota	2022-04-10
OQ967583	Influenza A virus (A/chicken/Minnesota/22-010993-004/2022(H5N1)) segment 7 matrix protein 2 (M2) and matrix protein 1 (M1) genes, complete cds	982	Minnesota	2022-04-10
OQ967591	Influenza A virus (A/chicken/Minnesota/22-010994-001/2022(H5N1)) segment 7 matrix protein 2 (M2) and matrix protein 1 (M1) genes, complete cds	982	Minnesota	2022-04-10
OQ967599	Influenza A virus (A/chicken/Minnesota/22-012373-001/2022(H5N1)) segment 7 matrix protein 2 (M2) and matrix protein 1 (M1) genes, complete cds	982	Minnesota	2022-04-21
OQ967607	Influenza A virus (A/chicken/Minnesota/22-012932-001/2022(H5N1)) segment 7 matrix protein 2 (M2) and matrix protein 1 (M1) genes, complete cds	982	Minnesota	2022-04-26
OQ967615	Influenza A virus (A/chicken/Minnesota/22-012966-001/2022(H5N1)) segment 7 matrix protein 2 (M2) and matrix protein 1 (M1) genes, complete cds	982	Minnesota	2022-04-26
OQ967623	Influenza A virus (A/chicken/Missouri/22-006569-001/2022(H5N1)) segment 7 matrix protein 2 (M2) and matrix protein 1 (M1) genes, complete cds	982	Missouri	2022-03-02
OQ967631	Influenza A virus (A/chicken/Missouri/22-006569-004/2022(H5N1)) segment 7 matrix protein 2 (M2) and matrix protein 1 (M1) genes, complete cds	982	Missouri	2022-03-02
OQ967639	Influenza A virus (A/chicken/Missouri/22-006569-005/2022(H5N1)) segment 7 matrix protein 2 (M2) and matrix protein 1 (M1) genes, complete cds	982	Missouri	2022-03-02
OQ967647	Influenza A virus (A/chicken/Missouri/22-006569-007/2022(H5N1)) segment 7 matrix protein 2 (M2) and matrix protein 1 (M1) genes, complete cds	982	Missouri	2022-03-02
OQ967655	Influenza A virus (A/chicken/Montana/22-010923-004/2022(H5N1)) segment 7 matrix protein 2 (M2) and matrix protein 1 (M1) genes, complete cds	982	Montana	2022-04-09
OQ967663	Influenza A virus (A/chicken/Montana/22-010923-006/2022(H5N1)) segment 7 matrix protein 2 (M2) and matrix protein 1 (M1) genes, complete cds	982	Montana	2022-04-09
OQ967671	Influenza A virus (A/chicken/Montana/22-012040-001/2022(H5N1)) segment 7 matrix protein 2 (M2) and matrix protein 1 (M1) genes, complete cds	982	Montana	2022-04-19
OQ967679	Influenza A virus (A/chicken/Montana/22-012040-003/2022(H5N1)) segment 7 matrix protein 2 (M2) and matrix protein 1 (M1) genes, complete cds	982	Montana	2022-04-19
OQ967687	Influenza A virus (A/chicken/Montana/22-012540-001/2022(H5N1)) segment 7 matrix protein 2 (M2) and matrix protein 1 (M1) genes, complete cds	982	Montana	2022-04-22
OQ967695	Influenza A virus (A/chicken/Montana/22-013053-001/2022(H5N1)) segment 7 matrix protein 2 (M2) and matrix protein 1 (M1) genes, complete cds	982	Montana	2022-04-28
OQ967703	Influenza A virus (A/chicken/Montana/22-013053-002/2022(H5N1)) segment 7 matrix protein 2 (M2) and matrix protein 1 (M1) genes, complete cds	982	Montana	2022-04-28
OQ967711	Influenza A virus (A/chicken/Montana/22-013056-002/2022(H5N1)) segment 7 matrix protein 2 (M2) and matrix protein 1 (M1) genes, complete cds	982	Montana	2022-04-28
OQ967719	Influenza A virus (A/chicken/Nebraska/22-008467-001/2022(H5N1)) segment 7 matrix protein 2 (M2) and matrix protein 1 (M1) genes, complete cds	982	Nebraska	2022-03-21
OQ967727	Influenza A virus (A/chicken/Nebraska/22-009006-001/2022(H5N1)) segment 7 matrix protein 2 (M2) and matrix protein 1 (M1) genes, complete cds	982	Nebraska	2022-03-23
OQ967735	Influenza A virus (A/chicken/Nebraska/22-010905-001/2022(H5N1)) segment 7 matrix protein 2 (M2) and matrix protein 1 (M1) genes, complete cds	982	Nebraska	2022-04-11
OQ967743	Influenza A virus (A/chicken/Nebraska/22-012756-001/2022(H5N1)) segment 7 matrix protein 2 (M2) and matrix protein 1 (M1) genes, complete cds	982	Nebraska	2022-04-26
OQ967751	Influenza A virus (A/chicken/North Carolina/22-010298-001/2022(H5N1)) segment 7 matrix protein 2 (M2) and matrix protein 1 (M1) genes, complete cds	982	North Carolina	2022-04-04
OQ967759	Influenza A virus (A/chicken/North Carolina/22-010298-002/2022(H5N1)) segment 7 matrix protein 2 (M2) and matrix protein 1 (M1) genes, complete cds	982	North Carolina	2022-04-04
OQ967767	Influenza A virus (A/chicken/North Carolina/22-010299-002/2022(H5N1)) segment 7 matrix protein 2 (M2) and matrix protein 1 (M1) genes, complete cds	982	North Carolina	2022-04-04
OQ967775	Influenza A virus (A/chicken/North Carolina/22-010929-001/2022(H5N1)) segment 7 matrix protein 2 (M2) and matrix protein 1 (M1) genes, complete cds	982	North Carolina	2022-04-11
OQ967783	Influenza A virus (A/chicken/North Carolina/22-010929-002/2022(H5N1)) segment 7 matrix protein 2 (M2) and matrix protein 1 (M1) genes, complete cds	982	North Carolina	2022-04-11
OQ967791	Influenza A virus (A/chicken/North Carolina/22-010929-007/2022(H5N1)) segment 7 matrix protein 2 (M2) and matrix protein 1 (M1) genes, complete cds	982	North Carolina	2022-04-11
OQ967799	Influenza A virus (A/chicken/North Dakota/22-009337-001/2022(H5N1)) segment 7 matrix protein 2 (M2) and matrix protein 1 (M1) genes, complete cds	982	North Dakota	2022-03-28
OQ967807	Influenza A virus (A/chicken/North Dakota/22-009677-001/2022(H5N1)) segment 7 matrix protein 2 (M2) and matrix protein 1 (M1) genes, complete cds	982	North Dakota	2022-03-30
OQ967815	Influenza A virus (A/chicken/North Dakota/22-011109-001/2022(H5N1)) segment 7 matrix protein 2 (M2) and matrix protein 1 (M1) genes, complete cds	982	North Dakota	2022-04-11
OQ967823	Influenza A virus (A/chicken/North Dakota/22-011286-001/2022(H5N1)) segment 7 matrix protein 2 (M2) and matrix protein 1 (M1) genes, complete cds	982	North Dakota	2022-04-12
OQ967831	Influenza A virus (A/chicken/North Dakota/22-012538-001/2022(H5N1)) segment 7 matrix protein 2 (M2) and matrix protein 1 (M1) genes, complete cds	982	North Dakota	2022-04-25
OQ967839	Influenza A virus (A/chicken/North Dakota/22-012538-002/2022(H5N1)) segment 7 matrix protein 2 (M2) and matrix protein 1 (M1) genes, complete cds	982	North Dakota	2022-04-25
OQ967847	Influenza A virus (A/chicken/Oklahoma/22-013220-001/2022(H5N1)) segment 7 matrix protein 2 (M2) and matrix protein 1 (M1) genes, complete cds	982	oklahoma	2022-04-28
OQ967855	Influenza A virus (A/chicken/Pennsylvania/22-011531-001/2022(H5N1)) segment 7 matrix protein 2 (M2) and matrix protein 1 (M1) genes, complete cds	982	Pennsylvania	2022-04-14
OQ967863	Influenza A virus (A/chicken/Pennsylvania/22-011531-005/2022(H5N1)) segment 7 matrix protein 2 (M2) and matrix protein 1 (M1) genes, complete cds	982	Pennsylvania	2022-04-14
OQ967871	Influenza A virus (A/chicken/Pennsylvania/22-011531-006/2022(H5N1)) segment 7 matrix protein 2 (M2) and matrix protein 1 (M1) genes, complete cds	982	Pennsylvania	2022-04-14
OQ967879	Influenza A virus (A/chicken/Pennsylvania/22-011767-001/2022(H5N1)) segment 7 matrix protein 2 (M2) and matrix protein 1 (M1) genes, complete cds	982	Pennsylvania	2022-04-16
OQ967887	Influenza A virus (A/chicken/Pennsylvania/22-011920-001/2022(H5N1)) segment 7 matrix protein 2 (M2) and matrix protein 1 (M1) genes, complete cds	982	Pennsylvania	2022-04-18
OQ967895	Influenza A virus (A/chicken/Pennsylvania/22-011921-002/2022(H5N1)) segment 7 matrix protein 2 (M2) and matrix protein 1 (M1) genes, complete cds	982	Pennsylvania	2022-04-18
OQ967903	Influenza A virus (A/chicken/Pennsylvania/22-012091-001/2022(H5N1)) segment 7 matrix protein 2 (M2) and matrix protein 1 (M1) genes, complete cds	982	Pennsylvania	2022-04-19
OQ967911	Influenza A virus (A/chicken/Pennsylvania/22-012092-003/2022(H5N1)) segment 7 matrix protein 2 (M2) and matrix protein 1 (M1) genes, complete cds	982	Pennsylvania	2022-04-19
OQ967919	Influenza A virus (A/chicken/Pennsylvania/22-012092-005/2022(H5N1)) segment 7 matrix protein 2 (M2) and matrix protein 1 (M1) genes, complete cds	982	Pennsylvania	2022-04-19
OQ967927	Influenza A virus (A/chicken/Pennsylvania/22-012092-007/2022(H5N1)) segment 7 matrix protein 2 (M2) and matrix protein 1 (M1) genes, complete cds	982	Pennsylvania	2022-04-19
OQ967935	Influenza A virus (A/chicken/Pennsylvania/22-012092-008/2022(H5N1)) segment 7 matrix protein 2 (M2) and matrix protein 1 (M1) genes, complete cds	982	Pennsylvania	2022-04-19
OQ967943	Influenza A virus (A/chicken/Pennsylvania/22-012248-001/2022(H5N1)) segment 7 matrix protein 2 (M2) and matrix protein 1 (M1) genes, complete cds	982	Pennsylvania	2022-04-19
OQ967951	Influenza A virus (A/chicken/Pennsylvania/22-012578-004/2022(H5N1)) segment 7 matrix protein 2 (M2) and matrix protein 1 (M1) genes, complete cds	982	Pennsylvania	2022-04-25
OQ967959	Influenza A virus (A/chicken/Pennsylvania/22-012742-001/2022(H5N1)) segment 7 matrix protein 2 (M2) and matrix protein 1 (M1) genes, complete cds	982	Pennsylvania	2022-04-26
OQ967967	Influenza A virus (A/chicken/Utah/22-011468-001/2022(H5N1)) segment 7 matrix protein 2 (M2) and matrix protein 1 (M1) genes, complete cds	982	Utah	2022-04-14
OQ967975	Influenza A virus (A/chicken/Utah/22-011468-002/2022(H5N1)) segment 7 matrix protein 2 (M2) and matrix protein 1 (M1) genes, complete cds	982	Utah	2022-04-14
OQ967983	Influenza A virus (A/chicken/Utah/22-012375-001/2022(H5N1)) segment 7 matrix protein 2 (M2) and matrix protein 1 (M1) genes, complete cds	982	Utah	2022-04-21
OQ967991	Influenza A virus (A/chicken/Wisconsin/22-007545-001/2022(H5N1)) segment 7 matrix protein 2 (M2) and matrix protein 1 (M1) genes, complete cds	982	Wisconsin	2022-03-13
OQ967999	Influenza A virus (A/chicken/Wisconsin/22-007545-004/2022(H5N1)) segment 7 matrix protein 2 (M2) and matrix protein 1 (M1) genes, complete cds	982	Wisconsin	2022-03-13
OQ968007	Influenza A virus (A/chicken/Wisconsin/22-007545-005/2022(H5N1)) segment 7 matrix protein 2 (M2) and matrix protein 1 (M1) genes, complete cds	982	Wisconsin	2022-03-13
OQ968015	Influenza A virus (A/chicken/Wisconsin/22-011334-002/2022(H5N1)) segment 7 matrix protein 2 (M2) and matrix protein 1 (M1) genes, complete cds	982	Wisconsin	2022-03-13

## Sheet: Duck
Accession Number	Strain	Size	State/region	Isolation date
OQ957615	Influenza A virus (A/American Black Duck/Connecticut/22-005000-001/2022(H5N1)) segment 7 matrix protein 2 (M2) and matrix protein 1 (M1) genes, complete cds	982	Connecticut	2022-02-06
OQ957623	Influenza A virus (A/American Black Duck/Connecticut/22-005313-006/2022(H5N1)) segment 7 matrix protein 2 (M2) and matrix protein 1 (M1) genes, complete cds	982	Connecticut	2022-02-16
OQ957631	Influenza A virus (A/American Black Duck/Connecticut/22-005313-007/2022(H5N1)) segment 7 matrix protein 2 (M2) and matrix protein 1 (M1) genes, complete cds	982	Connecticut	2022-02-16
OQ957639	Influenza A virus (A/American Black Duck/Connecticut/22-005313-008/2022(H5N1)) segment 7 matrix protein 2 (M2) and matrix protein 1 (M1) genes, complete cds	982	Connecticut	2022-02-16
OQ957647	Influenza A virus (A/American Black Duck/Ohio/22-009205-005/2022(H5N1)) segment 7 matrix protein 2 (M2) and matrix protein 1 (M1) genes, complete cds	982	Ohio	2022-03-04
OQ957655	Influenza A virus (A/American Black Duck/Ohio/22-009205-010/2022(H5N1)) segment 7 matrix protein 2 (M2) and matrix protein 1 (M1) genes, complete cds	982	Ohio	2022-03-04
OQ957663	Influenza A virus (A/American Black Duck/Ohio/22-009209-007/2022(H5N1)) segment 7 matrix protein 2 (M2) and matrix protein 1 (M1) genes, complete cds	982	Ohio	2022-03-09
OQ960927	Influenza A virus (A/Duck/Florida/22-006447-001/2022(H5N1)) segment 7 matrix protein 2 (M2) and matrix protein 1 (M1) genes, complete cds	982	Florida	2022-03-03
OQ960935	Influenza A virus (A/Duck/Idaho/22-012046-001/2022(H5N1)) segment 7 matrix protein 2 (M2) and matrix protein 1 (M1) genes, complete cds	982	Idaho	2022-04-18
OQ960943	Influenza A virus (A/Duck/Idaho/22-012047-001/2022(H5N1)) segment 7 matrix protein 2 (M2) and matrix protein 1 (M1) genes, complete cds	982	Idaho	2022-04-18
OQ960951	Influenza A virus (A/Duck/Indiana/22-010611-001/2022(H5N1)) segment 7 matrix protein 2 (M2) and matrix protein 1 (M1) genes, complete cds	982	Indiana	2022-04-07
OQ960959	Influenza A virus (A/Duck/Indiana/22-010624-001/2022(H5N1)) segment 7 matrix protein 2 (M2) and matrix protein 1 (M1) genes, complete cds	982	Indiana	2022-04-07
OQ960967	Influenza A virus (A/Duck/Indiana/22-011343-001/2022(H5N1)) segment 7 matrix protein 2 (M2) and matrix protein 1 (M1) genes, complete cds	982	Indiana	2022-04-12
OQ960975	Influenza A virus (A/Duck/Indiana/22-011946-002/2022(H5N1)) segment 7 matrix protein 2 (M2) and matrix protein 1 (M1) genes, complete cds	982	Indiana	2022-04-17
OQ960983	Influenza A virus (A/Duck/Indiana/22-011946-004/2022(H5N1)) segment 7 matrix protein 2 (M2) and matrix protein 1 (M1) genes, complete cds	982	Indiana	2022-04-17
OQ960991	Influenza A virus (A/Duck/Montana/22-010454-001/2022(H5N1)) segment 7 matrix protein 2 (M2) and matrix protein 1 (M1) genes, complete cds	982	Montana	2022-04-06
OQ960999	Influenza A virus (A/Duck/Montana/22-010454-003/2022(H5N1)) segment 7 matrix protein 2 (M2) and matrix protein 1 (M1) genes, complete cds	982	Montana	2022-04-06
OQ961007	Influenza A virus (A/Duck/Montana/22-012040-005/2022(H5N1)) segment 7 matrix protein 2 (M2) and matrix protein 1 (M1) genes, complete cds	982	Montana	2022-04-19
OQ961015	Influenza A virus (A/Duck/Montana/22-012040-007/2022(H5N1)) segment 7 matrix protein 2 (M2) and matrix protein 1 (M1) genes, complete cds	982	Montana	2022-04-19
OQ961023	Influenza A virus (A/Duck/Montana/22-013055-005/2022(H5N1)) segment 7 matrix protein 2 (M2) and matrix protein 1 (M1) genes, complete cds	982	Montana	2022-04-27
OQ961031	Influenza A virus (A/Duck/Montana/22-013055-006/2022(H5N1)) segment 7 matrix protein 2 (M2) and matrix protein 1 (M1) genes, complete cds	982	Montana	2022-04-27
OQ961039	Influenza A virus (A/Duck/Montana/22-013055-007/2022(H5N1)) segment 7 matrix protein 2 (M2) and matrix protein 1 (M1) genes, complete cds	982	Montana	2022-04-27
OQ961047	Influenza A virus (A/Duck/Pennsylvania/22-013189-003/2022(H5N1)) segment 7 matrix protein 2 (M2) and matrix protein 1 (M1) genes, complete cds	982	Pennsylvania	2022-04-28
OQ961055	Influenza A virus (A/Duck/Pennsylvania/22-013189-004/2022(H5N1)) segment 7 matrix protein 2 (M2) and matrix protein 1 (M1) genes, complete cds	982	Pennsylvania	2022-04-28
OQ962591	Influenza A virus (A/Muscovy Duck/Florida/22-010679-002/2022(H5N1)) segment 7 matrix protein 2 (M2) and matrix protein 1 (M1) genes, complete cds	982	Florida	2022-04-04
OQ962599	Influenza A virus (A/Muscovy Duck/Florida/22-010679-003/2022(H5N1)) segment 7 matrix protein 2 (M2) and matrix protein 1 (M1) genes, complete cds	982	Florida	2022-04-04
OQ962607	Influenza A virus (A/Muscovy Duck/Florida/22-010682-002/2022(H5N1)) segment 7 matrix protein 2 (M2) and matrix protein 1 (M1) genes, complete cds	982	Florida	2022-04-05
OQ963271	Influenza A virus (A/Ring-necked Duck/Michigan/22-009361-006/2022(H5N1)) segment 7 matrix protein 2 (M2) and matrix protein 1 (M1) genes, complete cds	982	Michigan	2022-03-23
OQ963279	Influenza A virus (A/Ring-necked Duck/Michigan/22-009361-011/2022(H5N1)) segment 7 matrix protein 2 (M2) and matrix protein 1 (M1) genes, complete cds	982	Michigan	2022-03-23
OQ963295	Influenza A virus (A/Ring-necked Duck/Missouri/22-012338-025/2022(H5N1)) segment 7 matrix protein 2 (M2) and matrix protein 1 (M1) genes, complete cds	982	Missouri	2022-03-11
OQ966959	Influenza A virus (A/Wood Duck/Michigan/22-009361-014/2022(H5N1)) segment 7 matrix protein 2 (M2) and matrix protein 1 (M1) genes, complete cds	982	Michigan	2022-03-23
OQ966967	Influenza A virus (A/Wood Duck/Michigan/22-009361-015/2022(H5N1)) segment 7 matrix protein 2 (M2) and matrix protein 1 (M1) genes, complete cds	982	Michigan	2022-03-23
OQ966991	Influenza A virus (A/Wood Duck/Minnesota/22-009381-001/2022(H5N1)) segment 7 matrix protein 2 (M2) and matrix protein 1 (M1) genes, complete cds	982	Minnesota	2022-03-24
OQ966999	Influenza A virus (A/Wood Duck/Minnesota/22-011225-001/2022(H5N1)) segment 7 matrix protein 2 (M2) and matrix protein 1 (M1) genes, complete cds	982	Minnesota	2022-04-05
OQ967071	Influenza A virus (A/Wood Duck/Missouri/22-012338-023/2022(H5N1)) segment 7 matrix protein 2 (M2) and matrix protein 1 (M1) genes, complete cds	982	Missouri	2022-04-07
OQ967079	Influenza A virus (A/Wood Duck/New York/22-011188-001/2022(H5N1)) segment 7 matrix protein 2 (M2) and matrix protein 1 (M1) genes, complete cds	982	New York	2022-04-11
OQ967087	Influenza A virus (A/Wood Duck/North Carolina/22-003829-001/2022(H5N1)) segment 7 matrix protein 2 (M2) and matrix protein 1 (M1) genes, complete cds	982	North Carolina	2022-01-29
OQ967095	Influenza A virus (A/Wood Duck/Tennessee/22-005907-002/2022(H5N1)) segment 7 matrix protein 2 (M2) and matrix protein 1 (M1) genes, complete cds	982	Tennessee	2022-02-13
OQ967103	Influenza A virus (A/Wood Duck/Wisconsin/22-011240-001/2022(H5N1)) segment 7 matrix protein 2 (M2) and matrix protein 1 (M1) genes, complete cds	982	Wisconsin	2022-03-29
OQ967111	Influenza A virus (A/Wood Duck/Wisconsin/22-011820-001/2022(H5N1)) segment 7 matrix protein 2 (M2) and matrix protein 1 (M1) genes, complete cds	982	Wisconsin	2022-04-05

## Sheet: Goose
Accession Number	Strain	Size	State/region	Isolation date
OQ957567	Influenza A virus (A/Canada Goose/Michigan/22-008506-005/2022(H5N1)) segment 7 matrix protein 2 (M2) and matrix protein 1 (M1) genes, complete cds	982	Michigan	2022-03-17
OQ960431	Influenza A virus (A/Canada Goose/Colorado/22-010377-001/2022(H5N1)) segment 7 matrix protein 2 (M2) and matrix protein 1 (M1) genes, complete cds	982	Colorado	2022-04-01
OQ960439	Influenza A virus (A/Canada Goose/Colorado/22-013125-001/2022(H5N1)) segment 7 matrix protein 2 (M2) and matrix protein 1 (M1) genes, complete cds	982	Colorado	2022-04-26
OQ960447	Influenza A virus (A/Canada Goose/Delaware/22-004745-001/2022(H5N1)) segment 7 matrix protein 2 (M2) and matrix protein 1 (M1) genes, complete cds	982	Delaware	2022-02-04
OQ960455	Influenza A virus (A/Canada Goose/Florida/22-010682-001/2022(H5N1)) segment 7 matrix protein 2 (M2) and matrix protein 1 (M1) genes, complete cds	982	Florida	2022-04-05
OQ960463	Influenza A virus (A/Canada Goose/Illinois/22-008379-001/2022(H5N1)) segment 7 matrix protein 2 (M2) and matrix protein 1 (M1) genes, complete cds	982	Illinois	2022-03-16
OQ960471	Influenza A virus (A/Canada Goose/Massachusetts/22-005893-001/2022(H5N1)) segment 7 matrix protein 2 (M2) and matrix protein 1 (M1) genes, complete cds	982	Massachusetts	2022-02-03
OQ960479	Influenza A virus (A/Canada Goose/Massachusetts/22-005893-002/2022(H5N1)) segment 7 matrix protein 2 (M2) and matrix protein 1 (M1) genes, complete cds	982	Massachusetts	2022-02-03
OQ960487	Influenza A virus (A/Canada Goose/Massachusetts/22-007630-001/2022(H5N1)) segment 7 matrix protein 2 (M2) and matrix protein 1 (M1) genes, complete cds	982	Massachusetts	2022-03-08
OQ960495	Influenza A virus (A/Canada Goose/Michigan/22-008506-003/2022(H5N1)) segment 7 matrix protein 2 (M2) and matrix protein 1 (M1) genes, complete cds	982	Michigan	2022-03-17
OQ960503	Influenza A virus (A/Canada Goose/Michigan/22-008506-004/2022(H5N1)) segment 7 matrix protein 2 (M2) and matrix protein 1 (M1) genes, complete cds	982	Michigan	2022-03-17
OQ960511	Influenza A virus (A/Canada Goose/Michigan/22-008506-006/2022(H5N1)) segment 7 matrix protein 2 (M2) and matrix protein 1 (M1) genes, complete cds	982	Michigan	2022-03-17
OQ960519	Influenza A virus (A/Canada Goose/Michigan/22-008506-007/2022(H5N1)) segment 7 matrix protein 2 (M2) and matrix protein 1 (M1) genes, complete cds	982	Michigan	2022-03-17
OQ960527	Influenza A virus (A/Canada Goose/Michigan/22-008506-008/2022(H5N1)) segment 7 matrix protein 2 (M2) and matrix protein 1 (M1) genes, complete cds	982	Michigan	2022-03-17
OQ960535	Influenza A virus (A/Canada Goose/Minnesota/22-009383-001/2022(H5N1)) segment 7 matrix protein 2 (M2) and matrix protein 1 (M1) genes, complete cds	982	Minnesota	2022-03-25
OQ960543	Influenza A virus (A/Canada Goose/Minnesota/22-010232-001/2022(H5N1)) segment 7 matrix protein 2 (M2) and matrix protein 1 (M1) genes, complete cds	982	Minnesota	2022-03-25
OQ960551	Influenza A virus (A/Canada Goose/Minnesota/22-010355-002/2022(H5N1)) segment 7 matrix protein 2 (M2) and matrix protein 1 (M1) genes, complete cds	982	Minnesota	2022-04-05
OQ960559	Influenza A virus (A/Canada Goose/Missouri/22-012338-008/2022(H5N1)) segment 7 matrix protein 2 (M2) and matrix protein 1 (M1) genes, complete cds	982	Missouri	2022-03-18
OQ960567	Influenza A virus (A/Canada Goose/Missouri/22-012338-010/2022(H5N1)) segment 7 matrix protein 2 (M2) and matrix protein 1 (M1) genes, complete cds	982	Missouri	2022-03-18
OQ960575	Influenza A virus (A/Canada Goose/Missouri/22-012338-014/2022(H5N1)) segment 7 matrix protein 2 (M2) and matrix protein 1 (M1) genes, complete cds	982	Missouri	2022-03-01
OQ960583	Influenza A virus (A/Canada Goose/Missouri/22-012338-026/2022(H5N1)) segment 7 matrix protein 2 (M2) and matrix protein 1 (M1) genes, complete cds	982	Missouri	2022-04-01
OQ960591	Influenza A virus (A/Canada Goose/Missouri/22-012338-029/2022(H5N1)) segment 7 matrix protein 2 (M2) and matrix protein 1 (M1) genes, complete cds	982	Missouri	2022-03-01
OQ960599	Influenza A virus (A/Canada Goose/Montana/22-011285-001/2022(H5N1)) segment 7 matrix protein 2 (M2) and matrix protein 1 (M1) genes, complete cds	982	Montana	2022-04-11
OQ960607	Influenza A virus (A/Canada Goose/Montana/22-012541-001/2022(H5N1)) segment 7 matrix protein 2 (M2) and matrix protein 1 (M1) genes, complete cds	982	Montana	2022-04-20
OQ960615	Influenza A virus (A/Canada Goose/Nebraska/22-007169-001/2022(H5N1)) segment 7 matrix protein 2 (M2) and matrix protein 1 (M1) genes, complete cds	982	Nebraska	2022-03-07
OQ960623	Influenza A virus (A/Canada Goose/Nebraska/22-007179-001/2022(H5N1)) segment 7 matrix protein 2 (M2) and matrix protein 1 (M1) genes, complete cds	982	Nebraska	2022-03-07
OQ960631	Influenza A virus (A/Canada Goose/New Hampshire/22-006203-001/2022(H5N1)) segment 7 matrix protein 2 (M2) and matrix protein 1 (M1) genes, complete cds	982	New Hampshire	2022-02-22
OQ960639	Influenza A virus (A/Canada Goose/New Hampshire/22-006203-002/2022(H5N1)) segment 7 matrix protein 2 (M2) and matrix protein 1 (M1) genes, complete cds	982	New Hampshire	2022-02-22
OQ960647	Influenza A virus (A/Canada Goose/New Hampshire/22-006203-003/2022(H5N1)) segment 7 matrix protein 2 (M2) and matrix protein 1 (M1) genes, complete cds	982	New Hampshire	2022-02-22
OQ960655	Influenza A virus (A/Canada Goose/New Hampshire/22-010920-002/2022(H5N1)) segment 7 matrix protein 2 (M2) and matrix protein 1 (M1) genes, complete cds	982	New Hampshire	2022-04-07
OQ960663	Influenza A virus (A/Canada Goose/New York/22-009396-001/2022(H5N1)) segment 7 matrix protein 2 (M2) and matrix protein 1 (M1) genes, complete cds	982	New York	2022-03-21
OQ960671	Influenza A virus (A/Canada Goose/North Dakota/22-010036-004/2022(H5N1)) segment 7 matrix protein 2 (M2) and matrix protein 1 (M1) genes, complete cds	982	North Dakota	2022-03-25
OQ960679	Influenza A virus (A/Canada Goose/Ohio/22-007948-001/2022(H5N1)) segment 7 matrix protein 2 (M2) and matrix protein 1 (M1) genes, complete cds	982	Ohio	2022-03-01
OQ960687	Influenza A virus (A/Canada Goose/Ohio/22-008995-001/2022(H5N1)) segment 7 matrix protein 2 (M2) and matrix protein 1 (M1) genes, complete cds	982	Ohio	2022-03-15
OQ960695	Influenza A virus (A/Canada Goose/Ohio/22-008995-002/2022(H5N1)) segment 7 matrix protein 2 (M2) and matrix protein 1 (M1) genes, complete cds	982	Ohio	2022-03-15
OQ960703	Influenza A virus (A/Canada Goose/South Dakota/22-007946-003/2022(H5N1)) segment 7 matrix protein 2 (M2) and matrix protein 1 (M1) genes, complete cds	982	South Dakota	2022-03-09
OQ960711	Influenza A virus (A/Canada Goose/South Dakota/22-008382-001/2022(H5N1)) segment 7 matrix protein 2 (M2) and matrix protein 1 (M1) genes, complete cds	982	South Dakota	2022-03-16
OQ960719	Influenza A virus (A/Canada Goose/South Dakota/22-008571-001/2022(H5N1)) segment 7 matrix protein 2 (M2) and matrix protein 1 (M1) genes, complete cds	982	South Dakota	2022-03-14
OQ960727	Influenza A virus (A/Canada Goose/South Dakota/22-008571-002/2022(H5N1)) segment 7 matrix protein 2 (M2) and matrix protein 1 (M1) genes, complete cds	982	South Dakota	2022-03-14
OQ960735	Influenza A virus (A/Canada Goose/South Dakota/22-008571-003/2022(H5N1)) segment 7 matrix protein 2 (M2) and matrix protein 1 (M1) genes, complete cds	982	South Dakota	2022-03-14
OQ960743	Influenza A virus (A/Canada Goose/Tennessee/22-010667-001/2022(H5N1)) segment 7 matrix protein 2 (M2) and matrix protein 1 (M1) genes, complete cds	982	Tenesse	2022-04-01
OQ960751	Influenza A virus (A/Canada Goose/Vermont/22-012250-001/2022(H5N1)) segment 7 matrix protein 2 (M2) and matrix protein 1 (M1) genes, complete cds	982	Vermont	2022-04-18
OQ960759	Influenza A virus (A/Canada Goose/Wisconsin/22-009408-001/2022(H5N1)) segment 7 matrix protein 2 (M2) and matrix protein 1 (M1) genes, complete cds	982	Wisconsin	2022-03-20
OQ960767	Influenza A virus (A/Canada Goose/Wisconsin/22-011238-001/2022(H5N1)) segment 7 matrix protein 2 (M2) and matrix protein 1 (M1) genes, complete cds	982	Wisconsin	2022-03-28
OQ960775	Influenza A virus (A/Canada Goose/Wisconsin/22-011818-001/2022(H5N1)) segment 7 matrix protein 2 (M2) and matrix protein 1 (M1) genes, complete cds	982	Wisconsin	2022-04-02
OQ960783	Influenza A virus (A/Canada Goose/Wisconsin/22-011819-001/2022(H5N1)) segment 7 matrix protein 2 (M2) and matrix protein 1 (M1) genes, complete cds	982	Wisconsin	2022-04-04
OQ960791	Influenza A virus (A/Canada Goose/Wyoming/22-010373-001/2022(H5N1)) segment 7 matrix protein 2 (M2) and matrix protein 1 (M1) genes, complete cds	982	Wyoming	2022-03-31
OQ960799	Influenza A virus (A/Canada Goose/Wyoming/22-011125-001/2022(H5N1)) segment 7 matrix protein 2 (M2) and matrix protein 1 (M1) genes, complete cds	982	Wyoming	2022-04-10
OQ960807	Influenza A virus (A/Canada Goose/Wyoming/22-011671-001/2022(H5N1)) segment 7 matrix protein 2 (M2) and matrix protein 1 (M1) genes, complete cds	982	Wyoming	2022-04-13
OQ960815	Influenza A virus (A/Canada Goose/Wyoming/22-012062-001/2022(H5N1)) segment 7 matrix protein 2 (M2) and matrix protein 1 (M1) genes, complete cds	982	Wyoming	2022-04-18
OQ960823	Influenza A virus (A/Canada Goose/Wyoming/22-012665-003/2022(H5N1)) segment 7 matrix protein 2 (M2) and matrix protein 1 (M1) genes, complete cds	982	Wyoming	2022-04-21

## Sheet: Birds
Accession Number	Species	Strain	Size	State/region	Isolation date
OR818563	red-tailed hawk	Influenza A virus (A/red-tailed hawk/New York/NYCVH-22-8477/2022(H5N1)) segment 7 matrix protein 2 (M2) and matrix protein 1 (M1) genes, complete cds	1027	New York	2022-10-22
OR819063	peregrine falcon	Influenza A virus (A/peregrine falcon/New York/NYCVH-160820/2022(H5N1)) segment 7 matrix protein 2 (M2) and matrix protein 1 (M1) genes, complete cds	1027	New York	2022-12-18
OQ958079	Backyard bird	Influenza A virus (A/Backyard bird/Alaska/22-013107-002/2022(H5N1)) segment 7 matrix protein 2 (M2) and matrix protein 1 (M1) genes, complete cds	982	Alaska	2022-04-28
OQ958071	Backyard bird	Influenza A virus (A/Backyard bird/Alaska/22-013107-001/2022(H5N1)) segment 7 matrix protein 2 (M2) and matrix protein 1 (M1) genes, complete cds	982	Alaska	2022-04-28
OQ958087	Backyard bird	Influenza A virus (A/Backyard bird/Colorado/22-010668-001/2022(H5N1)) segment 7 matrix protein 2 (M2) and matrix protein 1 (M1) genes, complete cds	982	Colorado	2022-04-07
OQ958095	Backyard bird	Influenza A virus (A/Backyard bird/Colorado/22-011827-001/2022(H5N1)) segment 7 matrix protein 2 (M2) and matrix protein 1 (M1) genes, complete cds	982	Colorado	2022-04-15
OQ958103	Backyard bird	Influenza A virus (A/Backyard bird/Colorado/22-011827-002/2022(H5N1)) segment 7 matrix protein 2 (M2) and matrix protein 1 (M1) genes, complete cds	982	Colorado	2022-04-15
OQ958111	Backyard bird	Influenza A virus (A/Backyard bird/Connecticut/22-006118-001/2022(H5N1)) segment 7 matrix protein 2 (M2) and matrix protein 1 (M1) genes, complete cds	982	Connecticut	2022-02-28
OQ958119	Backyard bird	Influenza A virus (A/Backyard bird/Idaho/22-011775-001/2022(H5N1)) segment 7 matrix protein 2 (M2) and matrix protein 1 (M1) genes, complete cds	982	Idaho	2022-04-18
OQ958127	Backyard bird	Influenza A virus (A/Backyard bird/Idaho/22-011775-002/2022(H5N1)) segment 7 matrix protein 2 (M2) and matrix protein 1 (M1) genes, complete cds	982	Idaho	2022-04-18
OQ958135	Backyard bird	Influenza A virus (A/Backyard bird/Idaho/22-012045-001/2022(H5N1)) segment 7 matrix protein 2 (M2) and matrix protein 1 (M1) genes, complete cds	982	Idaho	2022-04-18
OQ958143	Backyard bird	Influenza A virus (A/Backyard bird/Idaho/22-012045-002/2022(H5N1)) segment 7 matrix protein 2 (M2) and matrix protein 1 (M1) genes, complete cds	982	Idaho	2022-04-18
OQ958151	Backyard bird	Influenza A virus (A/Backyard bird/Illinois/22-009720-001/2022(H5N1)) segment 7 matrix protein 2 (M2) and matrix protein 1 (M1) genes, complete cds	982	Illinois	2022-03-29
OQ958159	Backyard bird	Influenza A virus (A/Backyard bird/Illinois/22-009720-003/2022(H5N1)) segment 7 matrix protein 2 (M2) and matrix protein 1 (M1) genes, complete cds	982	Illinois	2022-03-29
OQ958167	Backyard bird	Influenza A virus (A/Backyard bird/Iowa/22-006114-001/2022(H5N1)) segment 7 matrix protein 2 (M2) and matrix protein 1 (M1) genes, complete cds	982	Iowa	2022-02-28
OQ958175	Backyard bird	Influenza A virus (A/Backyard bird/Iowa/22-008373-001/2022(H5N1)) segment 7 matrix protein 2 (M2) and matrix protein 1 (M1) genes, complete cds	982	Iowa	2022-03-19
OQ958199	Backyard bird	Influenza A virus (A/Backyard bird/Kansas/22-008114-001/2022(H5N1)) segment 7 matrix protein 2 (M2) and matrix protein 1 (M1) genes, complete cds	982	Kansas	2022-03-16
OQ958207	Backyard bird	Influenza A virus (A/Backyard bird/Kansas/22-008114-002/2022(H5N1)) segment 7 matrix protein 2 (M2) and matrix protein 1 (M1) genes, complete cds	982	Kansas	2022-03-17
OQ958247	Backyard bird	Influenza A virus (A/Backyard bird/Maine/22-005158-001/2022(H5N1)) segment 7 matrix protein 2 (M2) and matrix protein 1 (M1) genes, complete cds	982	Maine	2022-02-17
OQ958255	Backyard bird	Influenza A virus (A/Backyard bird/Maine/22-005443-001/2022(H5N1)) segment 7 matrix protein 2 (M2) and matrix protein 1 (M1) genes, complete cds	982	Maine	2022-02-20
OQ958383	Backyard bird	Influenza A virus (A/Backyard bird/Massachusetts/22-009371-001/2022(H5N1)) segment 7 matrix protein 2 (M2) and matrix protein 1 (M1) genes, complete cds	982	Massachusetts	2022-03-25
OQ958391	Backyard bird	Influenza A virus (A/Backyard bird/Michigan/22-005440-001/2022(H5N1)) segment 7 matrix protein 2 (M2) and matrix protein 1 (M1) genes, complete cds	982	Michigan	2022-02-22
OQ958399	Backyard bird	Influenza A virus (A/Backyard bird/Michigan/22-005440-002/2022(H5N1)) segment 7 matrix protein 2 (M2) and matrix protein 1 (M1) genes, complete cds	982	Michigan	2022-02-22
OQ958535	Backyard bird	Influenza A virus (A/Backyard bird/Minnesota/22-009181-001/2022(H5N1)) segment 7 matrix protein 2 (M2) and matrix protein 1 (M1) genes, complete cds	982	Minnesota	2022-03-25
OQ958543	Backyard bird	Influenza A virus (A/Backyard bird/Minnesota/22-009181-003/2022(H5N1)) segment 7 matrix protein 2 (M2) and matrix protein 1 (M1) genes, complete cds	982	Minnesota	2022-03-25
OQ958663	Backyard bird	Influenza A virus (A/Backyard bird/Missouri/22-006639-001/2022(H5N1)) segment 7 matrix protein 2 (M2) and matrix protein 1 (M1) genes, complete cds	982	Missouri	2022-03-03
OQ958671	Backyard bird	Influenza A virus (A/Backyard bird/Missouri/22-007677-001/2022(H5N1)) segment 7 matrix protein 2 (M2) and matrix protein 1 (M1) genes, complete cds	982	Missouri	2022-03-14
OQ958687	Backyard bird	Influenza A virus (A/Backyard bird/Montana/22-010445-001/2022(H5N1)) segment 7 matrix protein 2 (M2) and matrix protein 1 (M1) genes, complete cds	982	Montana	2022-04-05
OQ958695	Backyard bird	Influenza A virus (A/Backyard bird/Montana/22-010445-003/2022(H5N1)) segment 7 matrix protein 2 (M2) and matrix protein 1 (M1) genes, complete cds	982	Montana	2022-04-05
OQ958703	Backyard bird	Influenza A virus (A/Backyard bird/Nebraska/22-007805-001/2022(H5N1)) segment 7 matrix protein 2 (M2) and matrix protein 1 (M1) genes, complete cds	982	Nebraska	2022-03-14
OQ958711	Backyard bird	Influenza A virus (A/Backyard bird/Nebraska/22-007805-002/2022(H5N1)) segment 7 matrix protein 2 (M2) and matrix protein 1 (M1) genes, complete cds	982	Nebraska	2022-03-14
OQ958751	Backyard bird	Influenza A virus (A/Backyard bird/New Hampshire/22-007886-001/2022(H5N1)) segment 7 matrix protein 2 (M2) and matrix protein 1 (M1) genes, complete cds	982	New Hampshire	2022-03-15
OQ958759	Backyard bird	Influenza A virus (A/Backyard bird/New York/22-005647-001/2022(H5N1)) segment 7 matrix protein 2 (M2) and matrix protein 1 (M1) genes, complete cds	982	New York	2022-02-22
OQ958767	Backyard bird	Influenza A virus (A/Backyard bird/New York/22-005647-002/2022(H5N1)) segment 7 matrix protein 2 (M2) and matrix protein 1 (M1) genes, complete cds	982	New York	2022-02-22
OQ958831	Backyard bird	Influenza A virus (A/Backyard bird/North Carolina/22-009583-001/2022(H5N1)) segment 7 matrix protein 2 (M2) and matrix protein 1 (M1) genes, complete cds	982	North Carolina	2022-03-27
OQ958839	Backyard bird	Influenza A virus (A/Backyard bird/North Dakota/22-010141-001/2022(H5N1)) segment 7 matrix protein 2 (M2) and matrix protein 1 (M1) genes, complete cds	982	North Dakota	2022-04-04
OQ958847	Backyard bird	Influenza A virus (A/Backyard bird/North Dakota/22-010657-001/2022(H5N1)) segment 7 matrix protein 2 (M2) and matrix protein 1 (M1) genes, complete cds	982	North Dakota	2022-04-06
OQ958895	Backyard bird	Influenza A virus (A/Backyard bird/Ohio/22-009419-001/2022(H5N1)) segment 7 matrix protein 2 (M2) and matrix protein 1 (M1) genes, complete cds	982	Ohio	2022-03-26
OQ958903	Backyard bird	Influenza A virus (A/Backyard bird/South Dakota/22-009194-002/2022(H5N1)) segment 7 matrix protein 2 (M2) and matrix protein 1 (M1) genes, complete cds	982	South Dakota	2022-03-25
OQ958911	Backyard bird	Influenza A virus (A/Backyard bird/Virginia/22-004415-001/2022(H5N1)) segment 7 matrix protein 2 (M2) and matrix protein 1 (M1) genes, complete cds	982	Virginia	2022-02-11
OQ958919	Backyard bird	Influenza A virus (A/Backyard bird/Wisconsin/22-009934-002/2022(H5N1)) segment 7 matrix protein 2 (M2) and matrix protein 1 (M1) genes, complete cds	982	Wisconsin	2022-03-31
OQ958927	Backyard bird	Influenza A virus (A/Backyard bird/Wisconsin/22-010325-001/2022(H5N1)) segment 7 matrix protein 2 (M2) and matrix protein 1 (M1) genes, complete cds	982	Wisconsin	2022-04-05
OQ789278	American wigeon	Influenza A virus (A/American wigeon/South Carolina/AH0195145/2021(H5N1)) segment 7 matrix protein 2 (M2) and matrix protein 1 (M1) genes, complete cds	982	South Carolina	2021-12-30

## Sheet: Turkey
Accession Number	Strain	Size	State/region	Isolation date
OQ957583	Influenza A virus (A/Turkey/Minnesota/22-011787-001/2022(H5N1)) segment 7 matrix protein 2 (M2) and matrix protein 1 (M1) genes, complete cds	982	Minnesota	2022-04-15
OQ957591	Influenza A virus (A/Turkey/Minnesota/22-011787-002/2022(H5N1)) segment 7 matrix protein 2 (M2) and matrix protein 1 (M1) genes, complete cds	982	Minnesota	2022-04-15
OQ965191	Influenza A virus (A/Turkey Vulture/New York/22-011863-001/2022(H5N1)) segment 7 matrix protein 2 (M2) and matrix protein 1 (M1) genes, complete cds	982	New York	2022-04-12
OQ965199	Influenza A virus (A/Turkey Vulture/North Dakota/22-013134-001/2022(H5N1)) segment 7 matrix protein 2 (M2) and matrix protein 1 (M1) genes, complete cds	982	North Dakota	2022-04-21
OQ965207	Influenza A virus (A/Turkey Vulture/North Dakota/22-013144-001/2022(H5N1)) segment 7 matrix protein 2 (M2) and matrix protein 1 (M1) genes, complete cds	982	North Dakota	2022-04-21
OQ965223	Influenza A virus (A/Turkey Vulture/Vermont/22-011552-001/2022(H5N1)) segment 7 matrix protein 2 (M2) and matrix protein 1 (M1) genes, complete cds	982	Vermont	2022-04-12
OQ965231	Influenza A virus (A/Turkey/Indiana/22-003707-003/2022(H5N1)) segment 7 matrix protein 2 (M2) and matrix protein 1 (M1) genes, complete cds	982	Indiana	2022-02-07
OQ965239	Influenza A virus (A/Turkey/Indiana/22-004688-002/2022(H5N1)) segment 7 matrix protein 2 (M2) and matrix protein 1 (M1) genes, complete cds	982	Indiana	2022-02-14
OQ965327	Influenza A virus (A/Turkey/Iowa/22-006795-001/2022(H5N1)) segment 7 matrix protein 2 (M2) and matrix protein 1 (M1) genes, complete cds	982	Iowa	2022-03-06
OQ965335	Influenza A virus (A/Turkey/Iowa/22-008862-002/2022(H5N1)) segment 7 matrix protein 2 (M2) and matrix protein 1 (M1) genes, complete cds	982	Iowa	2022-03-23
OQ965431	Influenza A virus (A/Turkey/Kansas/22-011119-001/2022(H5N1)) segment 7 matrix protein 2 (M2) and matrix protein 1 (M1) genes, complete cds	982	Kansas	2022-04-09
OQ965439	Influenza A virus (A/Turkey/Kansas/22-011119-002/2022(H5N1)) segment 7 matrix protein 2 (M2) and matrix protein 1 (M1) genes, complete cds	982	Kansas	2022-04-09
OQ965455	Influenza A virus (A/Turkey/Kentucky/22-004546-001/2022(H5N1)) segment 7 matrix protein 2 (M2) and matrix protein 1 (M1) genes, complete cds	982	Kentucky	2022-02-12
OQ965463	Influenza A virus (A/Turkey/Minnesota/22-009182-001/2022(H5N1)) segment 7 matrix protein 2 (M2) and matrix protein 1 (M1) genes, complete cds	982	Minnesota	2022-03-25
OQ965471	Influenza A virus (A/Turkey/Minnesota/22-009182-002/2022(H5N1)) segment 7 matrix protein 2 (M2) and matrix protein 1 (M1) genes, complete cds	982	Minnesota	2022-03-25
OQ966143	Influenza A virus (A/Turkey/Missouri/22-006944-002/2022(H5N1)) segment 7 matrix protein 2 (M2) and matrix protein 1 (M1) genes, complete cds	982	Missouri	2022-03-07
OQ966151	Influenza A virus (A/Turkey/Missouri/22-007087-001/2022(H5N1)) segment 7 matrix protein 2 (M2) and matrix protein 1 (M1) genes, complete cds	982	Missouri	2022-03-08
OQ966183	Influenza A virus (A/Turkey/North Carolina/22-009332-001/2022(H5N1)) segment 7 matrix protein 2 (M2) and matrix protein 1 (M1) genes, complete cds	982	North Carolina	2022-03-27
OQ966191	Influenza A virus (A/Turkey/North Carolina/22-009981-001/2022(H5N1)) segment 7 matrix protein 2 (M2) and matrix protein 1 (M1) genes, complete cds	982	North Carolina	2022-03-31
OQ966303	Influenza A virus (A/Turkey/North Dakota/22-009840-001/2022(H5N1)) segment 7 matrix protein 2 (M2) and matrix protein 1 (M1) genes, complete cds	982	North Dakota	2022-03-30
OQ966311	Influenza A virus (A/Turkey/North Dakota/22-009978-001/2022(H5N1)) segment 7 matrix protein 2 (M2) and matrix protein 1 (M1) genes, complete cds	982	North Dakota	2022-04-01
OQ966343	Influenza A virus (A/Turkey/South Dakota/22-006792-001/2022(H5N1)) segment 7 matrix protein 2 (M2) and matrix protein 1 (M1) genes, complete cds	982	South Dakota	2022-03-04
OQ966351	Influenza A virus (A/Turkey/South Dakota/22-006792-002/2022(H5N1)) segment 7 matrix protein 2 (M2) and matrix protein 1 (M1) genes, complete cds	982	South Dakota	2022-03-04
OQ966735	Influenza A virus (A/Turkey/Utah/22-012960-001/2022(H5N1)) segment 7 matrix protein 2 (M2) and matrix protein 1 (M1) genes, complete cds	982	Utah	2022-04-26
OQ966743	Influenza A virus (A/Turkey/Wisconsin/22-010935-001/2022(H5N1)) segment 7 matrix protein 2 (M2) and matrix protein 1 (M1) genes, complete cds	982	Wisconsin	2022-04-10
OQ966751	Influenza A virus (A/Turkey/Wisconsin/22-010935-002/2022(H5N1)) segment 7 matrix protein 2 (M2) and matrix protein 1 (M1) genes, complete cds	982	Wisconsin	2022-04-10
OQ966871	Influenza A virus (A/Wild Turkey/Montana/22-012657-001/2022(H5N1)) segment 7 matrix protein 2 (M2) and matrix protein 1 (M1) genes, complete cds	982	Montana	2022-04-12
OQ966879	Influenza A virus (A/Wild Turkey/Montana/22-012657-002/2022(H5N1)) segment 7 matrix protein 2 (M2) and matrix protein 1 (M1) genes, complete cds	982	Montana	2022-04-12
OQ966887	Influenza A virus (A/Wild Turkey/Wyoming/22-011426-001/2022(H5N1)) segment 7 matrix protein 2 (M2) and matrix protein 1 (M1) genes, complete cds	982	Wyoming	2022-04-01
OQ966895	Influenza A virus (A/Wild Turkey/Wyoming/22-011426-003/2022(H5N1)) segment 7 matrix protein 2 (M2) and matrix protein 1 (M1) genes, complete cds	982	Wyoming	2022-04-01
